## **Time-varying reproduction numbers of COVID-19 in Georgia, USA, March 2-June 14, 2020: comparison of two estimation methods**

Kamalich Muniz-Rodriguez, MPH; Gerardo Chowell, PhD; Jessica S. Schwind, PhD; Randall Ford, DDS; Sylvia K. Ofori, MPH; Chigozie A. Ogwara, BS; Margaret R. Davies, BS; Terrence Jacobs, BS; Chi-Hin Cheung, MS; Logan T. Cowan, PhD; Andrew R. Hansen, DrPH; Isaac Chun-Hai Fung\*, PhD

Author affiliations: Department of Biostatistics, Epidemiology and Environmental Health Sciences, Jiann-Ping Hsu College of Public Health, Georgia Southern University, Statesboro, GA (Ms. Muniz-Rodriguez, Ms. Ofori, Dr. Schwind, Ms. Ogwara, Ms. Davies, Mr. Jacobs, Dr. Cowan, Dr. Fung); Department of Community Health and Health Policy, Jiann-Ping Hsu College of Public Health, Georgia Southern University, Statesboro, GA (Dr. Ford, Dr. Hansen); Department of Population Health Sciences, School of Public Health, Georgia State University, Atlanta, GA (Dr. Chowell); Independent researcher, Hong Kong (Mr. Cheung)

Authors ORCID: 0000-0002-4786-9438 (Ms. K. Muniz-Rodriguez); 0000-0003-2194-2251 (Dr. G. Chowell); 0000-0002-2056-0182 (Dr. J. S. Schwind); 0000-0002-6811-4464 (Dr. R. Ford); 0000-0002-9961-9975 (Ms. S. K. Ofori); 0000-0001-7418-0153 (Ms. C. A. Ogwara); 0000-0002-2447-4767 (Mr. C.-H. Cheung); 0000-0002-0462-7041 (Dr. L. T. Cowan); 0000-0001-5496-2529 (Dr. I. C.-H. Fung)

Email addresses: [km11200@georgiasouthern.edu](mailto:km11200@georgiasouthern.edu) (K. Muniz-Rodriguez); [gchowell@gsu.edu](mailto:gchowell@gsu.edu) (G. Chowell); [jschwind@georgiasouthern.edu](mailto:jschwind@georgiasouthern.edu) (J. S. Schwind); [rf08112@georgiasouthern.edu](mailto:rf08112@georgiasouthern.edu) (R. Ford); [so01935@georgiasouthern.edu](mailto:so01935@georgiasouthern.edu) (S. K. Ofori); [co05814@georgiasouthern.edu](mailto:co05814@georgiasouthern.edu) (C. A. Ogwara); [md18742@georgiasouthern.edu](mailto:md18742@georgiasouthern.edu) (M. R. Davies); [tj10163@georgiasouthern.edu](mailto:tj10163@georgiasouthern.edu) (T. Jacobs);

[westerpants@gmail.com](mailto:westerpants@gmail.com) (C.-H. Cheung); [lcowan@georgiasouthern.edu](mailto:lcowan@georgiasouthern.edu) (L. Cowan);

[ahansen@georgiasouthern.edu](mailto:ahansen@georgiasouthern.edu) (A. Hansen); [cfung@georgiasouthern.edu](mailto:cfung@georgiasouthern.edu) (I. C.-H. Fung)

\*Correspondence should be addressed to: Dr. Isaac Chun-Hai Fung, Department of Biostatistics, Epidemiology and Environmental Health Sciences, Jiann-Ping Hsu College of Public Health, P.O. Box 7989, Georgia Southern University, Statesboro, GA 30460-7989, USA. Telephone: 912-478-5079. Email: [cfung@georgiasouthern.edu](mailto:cfung@georgiasouthern.edu)

Author contributions

Authors Muniz-Rodriguez and Chowell contribute equally as co-first authors.

Word count: 3027

Abstract: 194

Acknowledgment: G.C. received support from NSF grant 1414374 as part of the joint NSF-NIH-USDA Ecology and Evolution of Infectious Diseases program. I.C.-H.F. received salary support from the Centers for Disease Control and Prevention (CDC) (19IPA1908208). This article is not part of I.C.-H.F.'s CDC-sponsored projects.

Disclaimer: The opinions expressed in this paper does not necessarily represent the official positions of the CDC or the United States Government.

**ABSTRACT (200, max 200)**

**Objective:** In 2020, SARS-CoV-2 impacted Georgia, USA. Georgia announced state-wide shelter-in-place on April 2 (implemented the next day) and announced the partial lifting of restrictions on April 27. Time-varying reproduction number estimates might vary depending on methodology.

**Methods:** Daily incidence of confirmed COVID-19 cases by reporting date, March 2-June 14, 2020, in Georgia, Metro Atlanta, and Dougherty County were analyzed. We estimated and compared the COVID-19 time-varying reproduction number,  $R_t$ , by R package EpiEstim (with a window of 1 and 2 weeks) and the renewal equation tied to the generalized growth model (GGM).

**Results:** The EpiEstim  $R_t$  estimates are more sensitive to fluctuation in incident cases than the GGM estimates. The median EpiEstim  $R_t$  estimate (1-week window) in Georgia dropped from between 2 and 4 in mid-March, to  $<2$  in late March and early April. The median  $R_t$  dropped  $<1$  for the first time on April 15.  $R_t$  fluctuates around 1 from mid-April to June 14. The  $R_t$  estimate by GGM dropped below 2 on March 7 and stabilized to the range of 1 to 1.1 by March 31.

**Conclusions:** GGM estimated  $R_t$  as an overall trend over a 3-month period, while EpiEstim is sensitive to daily variation in incidence.

**Key Words:** Coronavirus, COVID-19, Reproduction number, Infectious Disease, SARS-CoV-2

## INTRODUCTION

In 2020, the pandemic of coronavirus disease 2019 (COVID-19), caused by severe acute respiratory syndrome coronavirus 2 (SARS-CoV-2), impacted the state of Georgia (GA) as in other jurisdictions within the United States. Georgia ranked twelve out of fifty states and ten territories of the United States in terms of COVID-19 confirmed cases as of April 18, 2020.<sup>1</sup> Metro Atlanta counties have been the hardest hit by the virus with thousands of confirmed cases cumulatively: 6,350 in Fulton, 5,322 in Dekalb and 7,463 in Gwinnett as of June 26, 2020.<sup>2</sup> Dougherty County, with Albany as the county seat, was a COVID-19 hotspot in southeast GA and reported a large number of cases (as of June 26, 2020: cumulative number = 1,873, with incidence rate, IR=2,083 per 100,000 individuals).<sup>2</sup> In GA, every county government had the power to impose preventive measures to reduce viral transmission as they see fit, before the state imposed a state-wide emergency that overrode autonomy of county governments (Table 1). On March 23, 2020, the GA State Government issued an executive order requesting citizens with underlying conditions and those with a COVID-19 diagnosis to shelter-in-place.<sup>3</sup> Certain businesses were to remain closed and no more than 10 individuals could gather in a location without maintaining a distance of at least six feet. The order also called for restaurants to offer only curbside pick-ups or deliveries.<sup>3</sup> On April 2, 2020, a state-wide shelter-in-place ordinance was enacted by the Governor allowing only essential services to operate (implemented on April 3).<sup>4</sup> The GA State Government announced on April 27, 2020 during a press conference that services, such as beauty salons, barber shops, stores, and restaurants, can reopen if they follow pertinent social distancing measures specified by the state.<sup>5</sup> As the COVID-19 epidemic in GA continues, it is important to quantify the epidemiologic characteristics of COVID-19 so that we may formulate policies and implement interventions to minimize transmission and mortality.

To characterize the transmission potential of an epidemic, it is necessary to calculate the reproduction number based on the trajectory of the incidence curve.<sup>6</sup> The basic reproduction number,  $R_0$ , is the average number of secondary cases that one primary case can generate in a completely susceptible population in the absence of behavioral changes or public health interventions.<sup>6</sup> The estimated values of

the  $R_0$  for SARS-CoV-2 vary across geographic locations. An early study of the epidemic in Wuhan reported a  $R_0$  of 2.2 (assuming serial interval of 7.5).<sup>7</sup> A more recent study of the epidemic in China, adjusted for the changing case definition, estimated  $R_0$  of 1.8-2.0 (assuming serial interval of 7.5) or 1.4-1.5 (assuming serial interval of 4.7).<sup>8</sup> Our analysis of confirmed COVID-19 cases in Iran estimated the mean  $R_0$  as 3.5 or 4.4, depending on the statistical method (assuming serial interval of 4.4).<sup>9</sup>

In contrast, the time-varying (or time-dependent) reproduction number,  $R_t$ , is a time-dependent estimate of the secondary cases that arise from one case at time  $t$ , when depletion of the susceptible population, behavioral changes, and measures to control transmission of disease have taken place.<sup>10,11</sup> As with  $R_0$ , if  $R_t > 1$ , it indicates there is sustainable transmission in the population. When  $R_t < 1$ , disease transmission cannot be sustained, and it is used as an indication of the effectiveness of infection control measures.<sup>6,10</sup>

Various statistical methods have been proposed to estimate  $R_t$ . Their strengths and weaknesses have been recently assessed by researchers who compared the performance of different methods using synthetic epidemic data,<sup>12,13</sup> and observed COVID-19 incidence data.<sup>14</sup>

An oft-used method is the instantaneous reproduction number method implemented in the R package EpiEstim.<sup>10,11</sup> This Bayesian method provides an estimate of the average  $R_t$  over a short time window specified by the user (e.g., a 7-day window that ends at time  $t$ ). It treats the fluctuation in incidence data as signals of an increasing or decreasing reproduction number. This method has been used to estimate COVID-19  $R_t$  in jurisdictions such as mainland China,<sup>15</sup> Hong Kong,<sup>16</sup> Iran,<sup>17</sup> South Korea,<sup>18</sup> Italy,<sup>19</sup> Nigeria,<sup>20</sup> and Switzerland.<sup>21</sup>

Another method is based on the renewal equation,<sup>22,23</sup> which characterizes the incidence curve using the generalized growth model (GGM).<sup>24</sup> This method characterizes the mean trajectory of  $R_t$  over a longer time period assuming the intermittent fluctuation of incidence data as an underlying noise structure that follows a Poisson or negative binomial distribution. This method has been used to estimate COVID-19  $R_t$  in countries such as, Iran,<sup>9</sup> South Korea,<sup>25</sup> and Peru.<sup>26</sup>

This study aimed to use these two statistical methods and compared their  $R_t$  estimates for COVID-19 in GA, Dougherty County, and Metro Atlanta counties, analyzing historical data from March 2 through June 14, 2020, as the state incrementally implemented and then relaxed social distancing interventions (Table 1).

## **METHODS**

This study uses historical data from the COVID-19 pandemic, March 2 — June 14, 2020, in the state of GA, Dougherty County, and all Metro Atlanta counties (Supplementary Materials Tables S1-S12). Metro Atlanta is defined by the United States Office of Management and Budget as the “Atlanta-Sandy Springs-Alpharetta, Georgia Metropolitan Statistical Area.”<sup>27</sup> The list of Metro Atlanta counties is provided in Table 2.

### **Data acquisition**

We downloaded the cumulative data of confirmed cases from March 2 — June 14, 2020, for the entire state of GA and its counties from the New York Times (NYT) GitHub data repository.<sup>28</sup> Every jurisdiction in our study has a start date corresponding to the first reported case for the area, according to NYT (Table 2). The first case in GA was reported on March 2, 2020.<sup>28</sup> Our cutoff point for all jurisdictions was June 14, 2020, 7 weeks after businesses in the state reopened on April 27, 2020, following social distancing and prevention measures (Table 1).<sup>5</sup>

We verified the numbers with official statistical reports from the Georgia Department of Public Health (GA-DPH).<sup>2</sup> If any inconsistencies were found, the numbers from the GA-DPH were used as the standard. To estimate  $R_t$ , we transformed the cumulative numbers into daily number of cases reported to obtain daily SARS-CoV-2 incidence (Supplementary Materials Table S1-S12). We also searched the local government pages to verify if any control measures were established. Such information is presented in Table 1.

### **Statistical analyses**

*The instantaneous reproduction number (EpiEstim package)*

The  $R_t$  estimated by the R package EpiEstim is also known as an instantaneous reproduction number.<sup>11</sup> This measure is defined by Cori et al. as the ratio between  $I_t$ , the number of incident cases at time  $t$ , to  $\Lambda_t$ , the total infectiousness of all the infected individuals at time  $t$ . The latter is represented mathematically as  $\Lambda_t = \sum_{s=1}^t I_{t-s} w_s$ , i.e., the sum of infection incidence up to time  $t-1$ , weighted by an infectivity function  $w_s$ , which is a probability distribution describing the average infectiousness profile after infection and is usually represented by the serial interval distribution. Thus, the number of new cases at time  $t$  is Poisson-distributed with a mean of  $R_t \sum_{s=1}^t I_{t-s} w_s$ . Conditional on the number of new cases in previous time points,  $I_0, \dots, I_{t-1}$ , and given the reproduction number  $R_t$ , the likelihood of the incidence  $I_t$  is as follows:  $P(I_t | I_0, \dots, I_{t-1}, w, R_t) = \frac{(R_t \Lambda_t)^{I_t} e^{-R_t \Lambda_t}}{I_t!}$  where the total infectiousness of infected individuals at time  $t$ ,  $\Lambda_t = \sum_{s=1}^t I_{t-s} w_s$ .<sup>11</sup>

In other words,  $R_t = I_t / (\sum_{s=1}^t I_{t-s} w_s)$ . This can be interpreted as the average number of secondary cases that an infectious individual will infect at time  $t$ , if conditions remain the same at time  $t$ . As this formulation may result in a highly variable  $R_t$  estimate over time, the instantaneous reproduction number method as implemented in EpiEstim assumes that the  $R_t$  is constant over a specified time window of size  $\tau$  ending at time  $t$ . This will allow the estimate to be less variable and more precise. Given that transmissibility is assumed constant over a time period, from  $(t-\tau+1)$  to  $t$ , and is denoted by a reproduction number,  $R_{t,\tau}$ , the likelihood of the incidence during the time period, from  $I_{(t-\tau+1)}$  to  $I_t$ , conditional on incidence prior to the time period, from  $I_0$ , to  $I_{(t-\tau)}$ , is as follows:<sup>11</sup>  $P(I_{t-\tau+1}, \dots, I_t | I_0, \dots, I_{t-\tau}, w, R_{t,\tau}) =$

$$\prod_{s=t-\tau+1}^t \left[ \frac{(R_{t,\tau} \Lambda_s)^{I_s} e^{-R_{t,\tau} \Lambda_s}}{I_s!} \right]$$

Here, the time window used was a period of 7 days (main analysis) and 14 days (sensitivity analysis) respectively.

Using a Bayesian framework with a Gamma-distributed prior for  $R_{t,\tau}$ , Cori et al. derived an analytical expression of the posterior distribution of  $R_t$  and thus estimated its median, the variance, and

the 95% credible interval.<sup>11</sup> In this paper, the data was analyzed using EpiEstim version 2.2-3,<sup>10,11</sup> implemented in R Version 1.2.1335 Macintosh (R Core Team, Vienna, Austria).

### *Generalized growth model*

The GGM characterizes the COVID-19 daily incidence using the growth rate,  $r$ , and a scaling factor,  $p$ , of the growth rate as its parameters. The GGM model allows epidemiologists to measure multiple epidemic profiles, including constant incidence, sub-exponential growth, and exponential growth.<sup>29</sup> The GGM is represented by  $dC(t)/dt = C'(t) = rC(t)^p$ , where  $C'(t)$  corresponds to the incidence curve over time;  $C(t)$  describes the cumulative incidence over time  $t$ ;  $r$  is the growth rate (1/time) and  $p$  is the scaling parameter fitting sub-exponential growth.<sup>24,29</sup> The scaling parameter of GGM,  $p$ , represents exponential growth if  $p = 1$ , sub-exponential growth or polynomial growth if  $0 < p < 1$ , and constant growth if  $p = 0$ . To estimate the  $R_t$  at a specific time, we linked the GGM model fit to the renewal equation that estimates the temporal changes in the effective reproduction number using a discretized probability distribution ( $\rho_i$ ) of the serial interval, namely,  $R_{t_i} = \frac{I_i}{\sum_{j=0}^i (I_{i-j})\rho_i}$ . In the renewal equation we denote the total incidence at calendar time  $t_i$  by  $I_i$ . Here the denominator represents the total number of cases contributing to the new reported cases at time  $t_i$ . We simulated 300 curves to estimate uncertainty boundaries.<sup>24,29</sup> Because the time series of incident cases displays overdispersion, we assumed a negative binomial error structure underlying the data points (Tables 2).<sup>24</sup> The choice of the scaling parameter of the negative binomial distribution, i.e. the ratio of variance / mean, was manually explored (from 1, 2, 5 and then in the increments of 5) to achieve the lowest variance possible with at least 85% of the data points covered by the 95% prediction interval. The serial interval is assumed to follow a gamma distribution with a mean = 4.60 days, and standard deviation = 5.55 days.<sup>30</sup>

To estimate  $R_t$ , we analyzed the incidence data during March 2 — June 14, 2020. Statistical significance was defined a priori at  $\alpha = 0.05$ . Our GGM analyses were conducted in MATLAB R2019b (MathWorks, Natick, MA).

### *Creation of figures comparing EpiEstim and GGM results*



The processing of EpiEstim and GGM outputs and the creation of the figures comparing them were conducted using R version 3.6.2 (R Core Team, Vienna, Austria).

### *Ethics*

The Georgia Southern University Institutional Review Board made a non-human subjects determination for this project (H20364), under the G8 exemption category.

## **RESULTS**

Community transmission of SARS-CoV-2 remained ongoing in GA based on incidence data by date of report from March 2 – June 14, 2020. As of June 14, 2020, The median EpiEstim  $R_t$  estimates were 1.14 (95% credible interval, CrI, 1.11, 1.17) for a 1-week-window and 1.07 (95% CrI, 1.05, 1.09) for a 2-week-window respectively. In Metro Atlanta, the transmission may have been under control, with  $R_t$  estimates being 1.02 (95% CrI, 0.98, 1.06) for a 1-week-window and 0.98 (95% CrI, 0.95, 1.01) for a 2-week-window. Likewise, in Dougherty County, the transmission with  $R_t$  estimates being 1.03 (95% CrI, 0.72, 1.41) for a 1-week-window and 0.93 (95% CrI, 0.72, 1.17) for a 2-week-window. The mean GGM  $R_t$  estimate was 1.00 (95% confidence interval, CI, 1.00, 1.00) for GA, Metro Atlanta, and Dougherty County (Table 2).

The EpiEstim  $R_t$  estimates are more sensitive to fluctuation in incident cases than the GGM estimates. As social distancing measures unfolded and then relaxed in GA during our study period (March 2 – June 14, 2020), the median EpiEstim  $R_t$  estimate (1-week window) in Georgia dropped from between 2 and 4 in mid-March, to  $<2$  in late March and early April. The median  $R_t$  dropped  $<1$  for the first time on April 15.  $R_t$  fluctuated around 1 from mid-April to June 14. The 2-week window EpiEstim  $R_t$  estimate largely followed the trend of the 1-week window estimate, even though the 2-week estimate is smoother than the 1-week estimate when the  $R_t$  estimate fluctuates around 1 from late April to mid-June. The median  $R_t$  estimate by GGM dropped below 2 on March 7 and was stabilized to the range of 1 to 1.1 from March 31 through June 14 (Figure 1).

Regarding Metro Atlanta (Figure 2), EpiEstim  $R_t$  estimates (both 1-week and 2-week window) fluctuated above 1.5 in March and gradually decreased to around 1 in April and continued to fluctuate above and below 1. In contrast, the GGM  $R_t$  estimate dropped below 1.5 on March 9, and below 1.1 on March 29, and it stabilized between 1 and 1.1 through June 14. The  $R_t$  estimates for each of the Metro Atlanta counties are presented in Figures S1 to S29 in the Supplementary Materials.

Regarding Dougherty County (Figure 3), we observed a speedy decline in EpiEstim  $R_t$  estimates (both 1-week and 2-week window) from around 2 in late March to a low of 0.32 on April 26. This finding was primarily driven by the early epidemic observed in Dougherty County, which were large clusters of cases infected via two funerals that happened to be superspreading events.<sup>31</sup> The median GGM  $R_t$  estimate dropped below 1.5 on March 20, below 1.1 on March 28, and it stabilized between 1 and 1.1, through June 14.

## DISCUSSION

Community transmission of SARS-CoV-2 remained ongoing in GA as of June 14, 2020 (i.e., 10½ weeks after statewide shelter-in-place order was first imposed on April 2 and 7 weeks after businesses reopened under new social distancing guidance) (Table 1). The 95% CrI of both the 1-week and 2-week window EpiEstim  $R_t$  estimates were  $>1$ .

On April 27, GA reopened some sectors of the economy, with specific guidelines pertinent to social distancing.<sup>5</sup> As the economy reopened and increased unprotected social mixing ensued, an increase in daily number of new confirmed cases was observed in June as SARS-CoV-2 transmission continued unabated.<sup>2</sup> Our study documented the decrease in  $R_t$  following social distancing interventions in GA and provided further evidence that social distancing measures remained important to keep COVID-19 under control.

Furthermore, many residents in both rural and urban GA are medically vulnerable. A recent analysis by The Surgo Foundation estimated the COVID-19 community vulnerability index (CCVI) for Dougherty County, by combining epidemiologic risk factors for infection and sociodemographic factors,

at very high levels (CCVI = 0.87) when compared with counties in Metro Atlanta (Fulton county's CCVI = 0.42).<sup>32</sup> Although the EpiEstim  $R_t$  estimates for Dougherty County were  $<1$  from April 14 to April 30,  $R_t$  rebounded since late April, and it has been fluctuating with 95% CrI including 1 most of the time from early May to mid-June (Figure 3). This corresponded to the partial reopening of the GA economy. The relaxation of social distancing measures should be implemented with an abundance of caution due to the population's vulnerability. Another important factor for consideration is access to healthcare and surge capacity in hospitals, especially in rural GA. The healthcare system in Dougherty County was heavily impacted by the surge of COVID-19 patients driven by superspreading events.<sup>31</sup>

While economic factors are legitimate concerns for decisionmakers, reopening the economy too soon led to the resurgence of COVID-19 cases in GA as observed in June. Further research into the spatiotemporal variation of SARS-CoV-2 transmission potential and its association with economic and medical vulnerability will shed light on the disease and economic burden of COVID-19 in GA.

Our study compared the  $R_t$  estimate obtained using two methods: the instantaneous reproduction number method implemented in the R package EpiEstim<sup>10,11</sup> and the renewal equation linked to the GGM.<sup>24</sup> One major difference between the two methods is the underlying assumption about the fluctuation in the incident case count number. The EpiEstim estimate is sensitive to fluctuation in daily incident case counts as the instantaneous reproduction number method treats such changes as meaningful signals reflecting genuine increases or decreases in transmission potential. To the contrary, the GGM treats the fluctuation in daily incident case counts as noise and represent such noise with an underlying error structure using either a Poisson or a negative binomial distribution. Each method has its strengths and weaknesses. The instantaneous reproduction number method in the EpiEstim package should be used if the purpose is to identify time-dependent changes in the  $R_t$  estimate that reflects the implementation or relaxation of social distancing measures over time. GGM should be used if the purpose is to identify an overall trend of the epidemic trajectory and if the data is noisy, and we have reasons to believe that the fluctuations may reflect artifacts in the surveillance system.

Regarding the time window chosen for EpiEstim, we used a window of 7 days in our main analysis and 14 days in our sensitivity analysis. We did not use a window of  $<7$  days, because a weekend effect was observed in the data, i.e., the daily number of cases reported in the weekend was consistently smaller than those in the weekdays before or after the weekend. The 2-week window EpiEstim estimate lagged behind the 1-week window EpiEstim estimate when the  $R_t$  estimate fluctuates around 1. This result can be explained because the 2-week estimate was an average of 14 days and did not reflect the immediate change in transmission potential.

### *Limitations*

Our study is limited by several factors. First, we used the NYT dataset; data was recorded by reported date and not by day of symptom onset. Given the time difference between the transmission events and subsequent symptom onset, testing, and case reporting, the  $R_t$  estimates should reflect transmission that had happened several days ago (the sum of the incubation period and the delay to testing and case reporting). Second, our data does not differentiate between imported and community transmission cases. Third, cases may be underreported due to limited testing capacity, or they may be mild or asymptomatic cases. Fourth, our analysis is right-censored by June 14, 2020. Future studies can further extend the analysis as the pandemic progresses. Fifth, in addition to the two methods utilized here, there are other statistical methods that estimate  $R_t$ ,<sup>12,13</sup> e.g., the case reproduction number method as proposed by Walling and Teunis,<sup>33</sup> but they are out-of-scope for this paper.

### **CONCLUSION**

In Spring 2020, social distancing measures reduced the transmission of SARS-CoV-2 in GA. However, the epidemic has not yet been suppressed.  $R_t$  was fluctuating around 1 for GA, Metro Atlanta and Dougherty County since GA economy reopened in late April 2020. Government agencies should carefully consider the next steps of their COVID-19 plans for their communities considering ongoing transmission across GA.

## References

1. Centers for Disease Control and Prevention. CDC Coronavirus Interactive. *U.S. Cases 2020*; <https://www.cdc.gov/coronavirus-interactive/index.html>. Accessed April 18, 2020.
2. Georgia Department of Public Health. Georgia Department of Public Health COVID-19 Daily Status Report. 2020; <https://dph.georgia.gov/covid-19-daily-status-report>. Accessed June 26, 2020, 2020.
3. State of Georgia Government. Gov. Kemp Issues New Executive Orders, Provides COVID-19 Update (March 23, 2020). 2020; <https://gov.georgia.gov/press-releases/2020-03-23/gov-kemp-issues-new-executive-orders-provides-covid-19-update>. Accessed June 30, 2020.
4. State of Georgia Government. Governor Kemp Issues Shelter in Place Order (April 2, 2020). 2020; <https://gov.georgia.gov/press-releases/2020-04-02/governor-kemp-issues-shelter-in-place-order>. Accessed June 30, 2020.
5. State of Georgia Government. Governor Kemp Gives COVID-19 Update (April 27, 2020). 2020; <https://gov.georgia.gov/press-releases/2020-04-27/governor-kemp-gives-covid-19-update>. Accessed June 30, 2020.
6. Vynnycky E, White R. *An Introduction to Infectious Disease Modelling*. Oxford: Oxford University Press; 2010.
7. Li Q, Guan X, Wu P, et al. Early Transmission Dynamics in Wuhan, China, of Novel Coronavirus–Infected Pneumonia. *New England Journal of Medicine*. 2020;382(13):1199-1207.
8. Tsang TK, Wu P, Lin Y, Lau EHY, Leung GM, Cowling BJ. Effect of changing case definitions for COVID-19 on the epidemic curve and transmission parameters in mainland China: a modelling study. *The Lancet Public Health*. 2020.
9. Muniz-Rodriguez K, Fung IC-H, Ferdosi SR, et al. Severe Acute Respiratory Syndrome Coronavirus 2 Transmission Potential, Iran, 2020. *Emerging Infectious Disease journal*. 2020;26(8).
10. Thompson RN, Stockwin JE, van Gaalen RD, et al. Improved inference of time-varying reproduction numbers during infectious disease outbreaks. *Epidemics*. 2019;29:100356.
11. Cori A, Ferguson NM, Fraser C, Cauchemez S. A new framework and software to estimate time-varying reproduction numbers during epidemics. *Am J Epidemiol*. 2013;178(9):1505-1512.
12. Gostic KM, McGough L, Baskerville E, et al. Practical considerations for measuring the effective reproductive number, Rt. *medRxiv*. 2020;2020.06.18.20134858.
13. O'Driscoll M, Harry C, Donnelly CA, Cori A, Dorigatti I. A comparative analysis of statistical methods to estimate the reproduction number in emerging epidemics with implications for the current COVID-19 pandemic. *medRxiv*. 2020;2020.05.13.20101121.
14. Roosa K, Lee Y, Luo R, et al. Short-term Forecasts of the COVID-19 Epidemic in Guangdong and Zhejiang, China: February 13–23, 2020. *J Clin Med*. 2020;9(2).
15. Leung K, Wu JT, Liu D, Leung GM. First-wave COVID-19 transmissibility and severity in China outside Hubei after control measures, and second-wave scenario planning: a modelling impact assessment. *Lancet*. 2020;395(10233):1382-1393.
16. Cowling BJ, Ali ST, Ng TWY, et al. Impact assessment of non-pharmaceutical interventions against coronavirus disease 2019 and influenza in Hong Kong: an observational study. *Lancet Public Health*. 2020;5(5):e279-e288.
17. Najafi F, Izadi N, Hashemi-Nazari SS, Khosravi-Shadmani F, Nikbakht R, Shakiba E. Serial interval and time-varying reproduction number estimation for COVID-19 in western Iran. *New Microbes New Infect*. 2020;36:100715.
18. Zhuang Z, Zhao S, Lin Q, et al. Preliminary estimates of the reproduction number of the coronavirus disease (COVID-19) outbreak in Republic of Korea and Italy by 5 March 2020. *Int J Infect Dis*. 2020;95:308-310.

19. Moirano G, Schmid M, Barone-Adesi F. Short-Term Effects of Mitigation Measures for the Containment of the COVID-19 Outbreak: An Experience From Northern Italy. *Disaster Med Public Health Prep.* 2020:1-2.
20. Adegboye OA, Adekunle AI, Gayawan E. Early Transmission Dynamics of Novel Coronavirus (COVID-19) in Nigeria. *Int J Environ Res Public Health.* 2020;17(9):3054.
21. Scire J, Nadeau S, Vaughan T, et al. Reproductive number of the COVID-19 epidemic in Switzerland with a focus on the Cantons of Basel-Stadt and Basel-Landschaft. *Swiss Med Wkly.* 2020;150:w20271.
22. Nishiura H, Chowell G. The effective reproduction number as a prelude to statistical estimation of time-dependent epidemic trends. In: Chowell G, Hayman JM, Bettencourt LMA, Castillo-Chavez C, eds. *Mathematical and statistical estimation approaches in epidemiology.* Dordrecht: Springer Netherlands; 2009:103-121.
23. Chowell G, Hincapie-Palacio D, Ospina J, et al. Using Phenomenological Models to Characterize Transmissibility and Forecast Patterns and Final Burden of Zika Epidemics. *PLoS Curr.* 2016;8; doi:10.1371/currents.outbreaks.f14b2217c902f453d9320a43a35b9583.
24. Viboud C, Simonsen L, Chowell G. A generalized-growth model to characterize the early ascending phase of infectious disease outbreaks. *Epidemics.* 2016;15:27-37.
25. Shim E, Tariq A, Choi W, Lee Y, Chowell G. Transmission potential and severity of COVID-19 in South Korea. *International Journal of Infectious Diseases.* 2020;93:339-344.
26. Munayco CV, Tariq A, Rothenberg R, et al. Early transmission dynamics of COVID-19 in a southern hemisphere setting: Lima-Peru: February 29th–March 30th, 2020. *Infectious Disease Modelling.* 2020;5:338-345.
27. Office of Management and Budget. To the heads of Executive Departments and Establishments. 2015; <https://www.bls.gov/bls/omb-bulletin-15-01-revised-delineations-of-metropolitan-statistical-areas.pdf>.
28. Coronavirus (Covid-19) Data in the United States. 2020. <https://github.com/nytimes/covid-19-data>. Accessed April 18, 2020.
29. Chowell G. Fitting dynamic models to epidemic outbreaks with quantified uncertainty: A primer for parameter uncertainty, identifiability, and forecasts. *Infectious Disease Modelling.* 2017;2(3):379-398.
30. You C, Deng Y, Hu W, et al. Estimation of the time-varying reproduction number of COVID-19 outbreak in China. *Int J Hyg Environ Health.* 2020;228:113555.
31. Barry E. Days After a Funeral in a Georgia Town, Coronavirus 'Hit Like a Bomb' (New York Times, March 30, 2020). 2020; <https://www.nytimes.com/2020/03/30/us/coronavirus-funeral-albany-georgia.html>. Accessed June 27, 2020.
32. Surgo Foundation. The COVID-19 Community Vulnerability Index (CCVI). 2020; [https://precisionforcovid.org/ccvi?fbclid=IwAR0VsJVvj-RBNwEC62iJb32R1ZTVnWE0yT1H7SfUXeyF3JEBEKn69sY7JR\\_s](https://precisionforcovid.org/ccvi?fbclid=IwAR0VsJVvj-RBNwEC62iJb32R1ZTVnWE0yT1H7SfUXeyF3JEBEKn69sY7JR_s). Accessed April 27, 2020, 2020.
33. Wallinga J, Teunis P. Different epidemic curves for severe acute respiratory syndrome reveal similar impacts of control measures. *Am J Epidemiol.* 2004;160(6):509-516.
34. State of Georgia Government. News: Press Releases. 2020; <https://gov.georgia.gov/press-releases>. Accessed June 30, 2020.
35. Bartow County Commissioner. Emergency Administrative Order. 2020; 5. Available at: [https://www.bartowga.org/CommissionerOffice/COVID-19-EMERGENCY\\_DECLARATION\\_AMENDMENT\\_3-26-2020.pdf](https://www.bartowga.org/CommissionerOffice/COVID-19-EMERGENCY_DECLARATION_AMENDMENT_3-26-2020.pdf).
36. Board of Commissioners of Butts County. Resolution CR202008A Amending Local State of Emergency Declaration. 2020; <https://buttscountyga.com/cr202008aamendlsed/>. Accessed April 17, 2020, 2020.

37. Carroll County Facebook Page. Facebook post: Shelter in place 2020; <https://www.facebook.com/carrollcountyga/photos/a.125786450829871/3539184499490032/?type=3&theater>. Accessed April 17, 2020, 2020.
38. Carroll County Board of Health. Supplement local order of state of emergency. 2020; 8. Available at: <https://www.carrollcountyga.com/DocumentCenter/View/3515/FINAL-Carroll-County-Board-of-Health---Shelter-in-Place-3-24-20>.
39. Catoosa County. Coronavirus COVID-19 information. 2020; <https://www.catoosa.com/coronavirus-covid-19>. Accessed April 17, 2020, 2020.
40. Chattooga County Health Department. Public health director assesses Northwest Georgia coronavirus situation. 2020; [https://www.facebook.com/ChattoogaDPH/posts/828821817586018:0?\\_tn\\_ =K-R](https://www.facebook.com/ChattoogaDPH/posts/828821817586018:0?_tn_ =K-R). Accessed April 17, 2020, 2020.
41. Cherokee County Board of Commissioners. Declaration of local emergency and Local emergency order No. 2020-02. 2020; 6. Available at: <https://www.cherokeega.com/focus/coronavirus/Press-Releases/03-25-2020-CCBOC.pdf>. Accessed April 17, 2020, 2020.
42. Clayton County Government. Clayton County Government Facebook Profile. 2020; <https://www.facebook.com/ClaytonCountyGeorgia/>. Accessed April 17, 2020, 2020.
43. Cobb County Board of Commissioners. Chairman Issues Declaration of Emergency for COVID-19 Crisis - March 24, 2020. 2020; <https://www.youtube.com/watch?v=5YwWHcmra4M>. Accessed July 1, 2020.
44. Board of Commissioners of Coweta County. An ordinance for the taking of additional emergency measures and renewed declaration of a local state of emergency related to covid-19; and for other purposes. 2020; 5. Available at: <https://www.coweta.ga.us/home/showdocument?id=20166>.
45. DeKalb County. DeKalb CEO Thurmond Issues State of Emergency Executive Order. 2020; <https://www.dekalbcountyga.gov/news/dekalb-ceo-thurmond-issues-state-emergency-executive-order>. Accessed April 17, 2020.
46. Dougherty County Board of Commissioners. Media Advisory Shelter in Place. 2020; [http://www.dougherty.ga.us/filestorage/1800/379008/379614/DOCOadvisory\\_ShelterInPlace\\_032020.pdf](http://www.dougherty.ga.us/filestorage/1800/379008/379614/DOCOadvisory_ShelterInPlace_032020.pdf). Accessed 16.
47. Douglas County Board of Health. Declaration of Local State of Emergency. 2020; 8. Available at: <http://www.celebratedouglascounty.com/news/>.
48. Fayette County. Fayette County Will Extend Closure to the Public. 2020; <https://fayettetcountyga.gov/>. Accessed April 17, 2020.
49. Forsyth County Board of Commissioners. Forsyth County Chair Exercise of Emergency Powers Pursuant to a Declaration of Local Emergency. 2020; <https://www.forsythco.com/News/PostId/2644/senior-services-may-newsletter-now-available>.
50. Fulton County. Coronavirus Updates. *Updates on Fulton County Facility closures and Service Changes* 2020; <https://www.fultoncountyga.gov/news/2020/04/06/updates-on-fulton-county-facility-closures-and-service-changes>. Accessed April 17, 2020, 2020.
51. Hall County Georgia. General County News. 2020; <https://www.hallcounty.org/CivicAlerts.aspx?AID=751>. Accessed April 17, 2020, 2020.
52. Haralson County Boards of Commissioners. Emergency Order March 25, 2020. 2020; 10. Available at: <https://www.carrollcountyga.com/718/COVID-19-Update>.
53. Heard County Georgia. Heard County Board of Health Shelter in Place Order. *County News* 2020; [https://www.heardcountyga.com/news/2020/2020\\_ShelterOrder.html](https://www.heardcountyga.com/news/2020/2020_ShelterOrder.html). Accessed April 17, 2020, 2020.
54. Henry County Board of Commissioners. Ordinance #20-02. 2020; <https://www.co.henry.ga.us/Residents/COVID-19>.
55. Jasper County Board of Commissioners. Countywide Emergency Protective Order for all of Jasper County. 2002; 1. Available at: <https://jaspercountyga.org/emergency-protective-order/>.

56. Board of Commissioners Lamar County. Shelter in Place. 2020; <https://www.lamarcountyga.com>. Accessed 4.
57. Meriwether County Georgia Board of Commissioners. Press Release 3-24-2020. 2020; <https://www.meriwethercountyga.us>. Accessed 4.
58. Newton County. Newton County Measures for COVID-19. *Civic Alerts* 2020; <http://ncboc.com/CivicAlerts.aspx?AID=187>. Accessed April 17, 2020, 2020.
59. Paulding County Board of Commissioners. Ordinance 20-03 A Declaration of State Emergency Arising Because of COVID-19. 2020; <https://www.paulding.gov/CivicAlerts.aspx?CID=1>.
60. Pickens County. An Ordinance for the Declaration of a Local State of Emergency Related to COVID-19. 2020; 11. Available at: <https://pickenscountyga.gov>.
61. Walton County. An Ordinance Declaring a State of Emergency Arising because of COVID-19 and Taking Immediate Emergency Measures. 2020; <https://www.waltoncountyga.gov>.



Table 1. Control measures announced and implemented by state and local government agencies in the state of Georgia, in Metro Atlanta counties and Dougherty County in March-April, 2020. Note that most of these control measures began to be implemented the day after the announcement. For example, Georgia’s state-wide shelter-in-place was announced on April 2, 2020 to be implemented on April 3, 2020.

| Location                       | Date           | Implemented measure(s)                                                                                                                                                                                                                                                 |
|--------------------------------|----------------|------------------------------------------------------------------------------------------------------------------------------------------------------------------------------------------------------------------------------------------------------------------------|
| State of Georgia <sup>34</sup> | March 23, 2020 | Executive order to limit physical interactions including shelter-in-place if diagnosed with underlying conditions, bar closed, and no gathering with more them 10 individuals should take place.                                                                       |
|                                | April 2, 2020  | State-wide shelter-in-place order.                                                                                                                                                                                                                                     |
|                                | April 15, 2020 | State-wide testing for all symptomatic individuals (referral is still needed).                                                                                                                                                                                         |
|                                | April 27, 2020 | Businesses in the state will start opening following social distancing and prevention measures.                                                                                                                                                                        |
| Bartow County <sup>35</sup>    | March 20, 2020 | State of emergency declared by county officials.                                                                                                                                                                                                                       |
|                                | March 26, 2020 | Follow-up on the State Government Order to limit public gatherings to ten people. Restaurants will only be available for take-out or delivery. Establishments that require physical contact will be closed.                                                            |
| Butts County <sup>36</sup>     | March 24, 2020 | County declared under state of emergency. Limit public gatherings to ten people. Restaurants will only be available for take-out or delivery. Establishments that require physical contact will be closed.                                                             |
| Carroll County                 | March 22, 2020 | Shelter-in-place order for the county. No public gatherings of more than ten people, and food will be sold as take-out or delivery. <sup>37</sup>                                                                                                                      |
|                                | March 26, 2020 | Citizens should stay home, and gatherings of any size are prohibited. <sup>38</sup>                                                                                                                                                                                    |
| Catoosa County <sup>39</sup>   | March 23, 2020 | Follow-up on State government order to limit public gatherings to ten people. Restaurants will only be available for take-out or delivery. Establishments that require physical contact will be closed.                                                                |
| Chattooga County <sup>40</sup> | March 16, 2020 | Recommendation to cancel events and large gatherings over 50 people and maintain physical distance of 6 feet.                                                                                                                                                          |
| Cherokee County <sup>41</sup>  | March 25, 2020 | Declare local state of emergency, limit public gatherings to ten people. Restaurants will only be available for take-out or delivery. Individuals of at-risk groups should shelter-in-place, and those with a positive diagnosis will stay quarantined in their house. |
|                                | March 13, 2020 | Encouragement to citizens to avoid public gatherings and public events.                                                                                                                                                                                                |
| Clayton County <sup>42</sup>   | March 24, 2020 | State of emergency amended to include limiting gatherings to 10 individuals.                                                                                                                                                                                           |
|                                | March 24, 2020 | Declaration of state of emergency according to the state-level ordinance to emphasize social distancing. Essential business will open from 6:00 am to 9:00 pm, no dine-in services will be available.                                                                  |
| Cobb County <sup>43</sup>      | March 24, 2020 | Declaration of state of emergency according to the state-level ordinance to emphasize social distancing. Essential business will open from 6:00 am to 9:00 pm, no dine-in services will be available.                                                                  |
| Coweta County <sup>44</sup>    | March 26, 2020 | Declaration of state of emergency according to the state-level ordinance to emphasize social distancing. Declaration of voluntary shelter at home, no dine-in services will be available.                                                                              |
| DeKalb County <sup>45</sup>    | March 23, 2020 | Prohibition of gathering with ten or more people, citizens will shelter-in-place, curfew established from 9 am to 6 am, playgrounds, parks and gyms will remain close, and food services will be delivery or take-out only.                                            |
| Dougherty County <sup>46</sup> | March 21, 2020 | Shelter-in-place order, non-essential activities will be canceled. Restaurants will provide drive-through, pickup/curbside, and delivery services.                                                                                                                     |
| Douglas County <sup>47</sup>   | March 23, 2020 | Shelter-in-place order for county residents. Public gatherings of more than 10 are prohibited, restaurants will only be available for take-out or delivery.                                                                                                            |
|                                | April 1, 2020  | Public gatherings of ten or more are prohibited. Restaurants will only work curbside, take-out or delivery.                                                                                                                                                            |
| Fayette County <sup>48</sup>   | April 8, 2020  | Shelter-in-place in compliance with state-level ordinance.                                                                                                                                                                                                             |
|                                | March 18, 2020 | Public gatherings of ten or more are prohibited.                                                                                                                                                                                                                       |
| Forsyth County <sup>49</sup>   | March 18, 2020 | Public gatherings of ten or more are prohibited.                                                                                                                                                                                                                       |

| Location                        | Date           | Implemented measure(s)                                                                                                                                                                                                   |
|---------------------------------|----------------|--------------------------------------------------------------------------------------------------------------------------------------------------------------------------------------------------------------------------|
| Fulton County <sup>50</sup>     | March 18, 2020 | Senior centers, art center and libraries will be closed to the public.                                                                                                                                                   |
|                                 | March 24, 2020 | All libraries will be closed to the public.                                                                                                                                                                              |
|                                 | March 24, 2020 | Maintain less than 10 people in one location, restaurants will not have dine-in services, and residents must stay at home.                                                                                               |
|                                 | April 8, 2020  | Follow-up on Statewide Judicial Emergency. Services and hearings were suspended.                                                                                                                                         |
| Hall County <sup>51</sup>       | March 13, 2020 | Closure of libraries and parks in the County.                                                                                                                                                                            |
|                                 | March 19, 2020 | Commissioners placed a stay at home mandate.                                                                                                                                                                             |
|                                 | March 24, 2020 | Mandate closure of dine-in services.                                                                                                                                                                                     |
| Haralson County <sup>52</sup>   | March 25, 2020 | Shelter-in-place order, public gatherings are prohibited, travel only for essential activities.                                                                                                                          |
| Heard County <sup>53</sup>      | March 26, 2020 | Shelter-in-place order made official.                                                                                                                                                                                    |
| Henry County <sup>54</sup>      | April 1, 2020  | Shelter-in-place order for county residents. Public gatherings of more than 10 are prohibited, restaurants will only be available for take-out or delivery.                                                              |
| Jasper County <sup>55</sup>     | March 26, 2020 | Curfew from 10:00 pm to 6:00 am. Public gatherings of ten or more are prohibited. Restaurants will only work curbside, take-out or delivery.                                                                             |
| Lamar County <sup>56</sup>      | April 3, 2020  | Shelter-in-place order by county government.                                                                                                                                                                             |
| Meriwether County <sup>57</sup> | March 20, 2020 | State of emergency declared by county officials. Curfew from 9:00 pm to 6:00 am.                                                                                                                                         |
|                                 | March 24, 2020 | Public gatherings of ten or more are prohibited. Restaurants will only work curbside, take-out or delivery. Business where physical interaction is needed will be closed, and curfew is imposed from 9:00 pm to 6:00am.  |
| Newton County <sup>58</sup>     | March 31, 2020 | Shelter-in-place order for county residents. Public gatherings of more than 10 are prohibited, restaurants will only be available for take-out or delivery.                                                              |
| Paulding County <sup>59</sup>   | March 26, 2020 | Person showing symptoms shall refrain from entering public buildings; restaurants will refrain from in-dining services; non-essential businesses will remain closed; no gatherings of more than 10 people are permitted. |
| Pickens County <sup>60</sup>    | March 24, 2020 | Residents must shelter in their homes; all gatherings are suspended; all travel is limited to essential travel needs                                                                                                     |
| Walton County <sup>61</sup>     | March 26, 2020 | Public gatherings of ten or more are prohibited. Restaurants will only work curbside, take-out or delivery.                                                                                                              |

Table 2. Estimates for the time-varying reproduction number,  $R_t$ , on June 14, 2020 for the state of Georgia, Dougherty County, and Metro Atlanta counties, using the generalized growth model and using the instantaneous reproduction number method as implemented in the R package EpiEstim. Both analyses used a serial interval following a gamma distribution with a mean of 4.60 days and a standard deviation of 5.55 days, and  $\alpha = 0.05$ .

| Location      | First reported case (dd-mm-yy) | Generalized Growth Model           |                                                                                      |                           |                                 |                     | EpiEstim (1-week window)             |                                 | EpiEstim (2-week window)             |                                 |
|---------------|--------------------------------|------------------------------------|--------------------------------------------------------------------------------------|---------------------------|---------------------------------|---------------------|--------------------------------------|---------------------------------|--------------------------------------|---------------------------------|
|               |                                | Variance/Mean for NBD <sup>1</sup> | Number (%) / Total Number of points within 95% CI of simulated epidemic trajectories | Growth rate, $r$ (95% CI) | Scaling parameter, $p$ (95% CI) | Mean $R_t$ (95% CI) | Median $R_t$ (2.5%, 97.5% quantiles) | Mean $R_t$ (Standard Deviation) | Median $R_t$ (2.5%, 97.5% quantiles) | Mean $R_t$ (Standard Deviation) |
| Georgia       | 2-Mar-20                       | 100                                | 90/105 (86%)                                                                         | 18 (11,20)                | 0.35 (0.33, 0.41)               | 1.00 (1.00, 1.00)   | 1.14 (1.11, 1.17)                    | 1.14 (0.02)                     | 1.07 (1.05, 1.09)                    | 1.07 (0.01)                     |
| Dougherty     | 15-Mar-20                      | 10                                 | 86/92 (93%)                                                                          | 17 (8.5, 20)              | 0.031 (0, 0.13)                 | 1.00 (1.00, 1.00)   | 1.03 (0.72, 1.41)                    | 1.04 (0.18)                     | 0.93 (0.72, 1.17)                    | 0.93 (0.11)                     |
| Metro Atlanta | 2-Mar-20                       | 75                                 | 90/105 (86%)                                                                         | 16 (8.7,20)               | 0.32 (0.29, 0.39)               | 1.00 (1.00, 1.00)   | 1.02 (0.98, 1.06)                    | 1.02 (0.02)                     | 0.98 (0.95, 1.01)                    | 0.98 (0.01)                     |
| Bartow        | 11-Mar-20                      | 5                                  | 94/96 (98%)                                                                          | 4.7 (1.6, 6.7)            | 0.044 (0, 0.22)                 | 1.00 (1.00, 1.00)   | 0.73 (0.46, 1.08)                    | 0.74 (0.16)                     | 0.95 (0.74, 1.20)                    | 0.96 (0.12)                     |
| Butts         | 22-Mar-20                      | 5                                  | 83/85 (98%)                                                                          | 2.0 (0.56, 3.6)           | 0.11 (0, 0.37)                  | 1.00 (1.00, 1.00)   | 0.47 (0.11, 1.27)                    | 0.53 (0.30)                     | 0.78 (0.46, 1.21)                    | 0.79 (0.19)                     |
| Carroll       | 20-Mar-20                      | 5                                  | 81/87 (93%)                                                                          | 5.7 (2.3, 8)              | 0.046 (0, 0.21)                 | 1.00 (1.00, 1.00)   | 0.89 (0.63, 1.22)                    | 0.90 (0.15)                     | 0.96 (0.77, 1.17)                    | 0.96 (0.10)                     |
| Cherokee      | 8-Mar-20                       | 5                                  | 95/99 (96%)                                                                          | 2.3 (1.1, 4.4)            | 0.28 (0.15, 0.39)               | 1.00 (1.00, 1.00)   | 1.06 (0.83, 1.33)                    | 1.07 (0.13)                     | 0.87 (0.72, 1.03)                    | 0.87 (0.08)                     |
| Clayton       | 15-Mar-20                      | 10                                 | 88/92 (96%)                                                                          | 7.1 (2.5, 16)             | 0.15 (0, 0.3)                   | 1.00 (1.00, 1.00)   | 1.06 (0.79, 1.16)                    | 1.07 (0.10)                     | 1.02 (0.89, 1.16)                    | 1.02 (0.07)                     |
| Cobb          | 7-Mar-20                       | 10                                 | 91/100 (91%)                                                                         | 5.3 (2.9, 8.8)            | 0.28 (0.2, 0.36)                | 1.00 (1.00, 1.00)   | 1.15 (1.03, 1.27)                    | 1.15 (0.06)                     | 1.03 (0.95, 1.12)                    | 1.03 (0.04)                     |
| Coweta        | 14-Mar-20                      | 5                                  | 92/93 (99%)                                                                          | 1.3 (0.48, 2.8)           | 0.3 (0.13, 0.48)                | 1.00 (1.00, 1.00)   | 1.00 (0.75, 1.31)                    | 1.01 (0.14)                     | 0.96 (0.78, 1.17)                    | 0.96 (0.10)                     |
| Dawson        | 20-Mar-20                      | 2                                  | 85/86 (99%)                                                                          | 1 (0.39, 1.7)             | 0.091 (0, 0.35)                 | 1.00 (1.00, 1.00)   | 0.94 (0.36, 1.93)                    | 0.99 (0.41)                     | 0.86 (0.43, 1.53)                    | 0.89 (0.28)                     |
| Dekalb        | 9-Mar-20                       | 20                                 | /98 (92%)                                                                            | 7.8 (3.3, 15)             | 0.25 (0.15, 0.36)               | 1.00 (1.00, 1.00)   | 0.97 (0.86, 1.08)                    | 0.97 (0.06)                     | 0.89 (0.82, 0.96)                    | 0.89 (0.04)                     |
| Douglas       | 20-Mar-20                      | 2                                  | 76/87 (87%)                                                                          | 5.1 (2.9, 7.8)            | 0.08 (0, 0.18)                  | 1.00 (1.00, 1.00)   | 1.10 (0.85, 1.40)                    | 1.11 (0.14)                     | 1.07 (0.88, 1.28)                    | 1.07 (0.10)                     |
| Fayette       | 9-Mar-20                       | 2                                  | 92/98 (94%)                                                                          | 2.1 (1.0, 3.0)            | 0.063 (0, 0.22)                 | 1.00 (1.00, 1.00)   | 1.15 (0.68, 1.79)                    | 1.17 (0.28)                     | 1.08 (0.72, 1.54)                    | 1.09 (0.21)                     |
| Forsyth       | 16-Mar-20                      | 5                                  | 90/91 (99%)                                                                          | 3.2 (1.1, 6.7)            | 0.16 (0.0037, 0.33)             | 1.00 (1.00, 1.00)   | 1.10 (0.82, 1.43)                    | 1.10 (0.16)                     | 1.00 (0.80, 1.23)                    | 1.00 (0.11)                     |
| Fulton        | 2-Mar-20                       | 40                                 | 102/105 (97%)                                                                        | 9.9 (2.8, 20)             | 0.24 (0.12, 0.39)               | 1.00 (1.00, 1.00)   | 0.94 (0.83, 1.05)                    | 0.94 (0.06)                     | 0.88 (0.81, 0.95)                    | 0.88 (0.04)                     |
| Gwinnett      | 7-Mar-20                       | 20                                 | 92/100 (92%)                                                                         | 1.8 (1, 3.2)              | 0.47 (0.38, 0.55)               | 1.00 (1.00, 1.00)   | 1.05 (0.97, 1.12)                    | 1.05 (0.04)                     | 1.05 (0.99, 1.10)                    | 1.05 (0.03)                     |
| Hall          | 16-Mar-20                      | 20                                 | 83/91 (91%)                                                                          | 9.8 (3.3, 20)             | 0.18 (0.053, 0.33)              | 1.00 (1.00, 1.00)   | 0.96 (0.81, 1.13)                    | 0.96 (0.08)                     | 0.99 (0.88, 1.11)                    | 0.99 (0.06)                     |

|            |           |                |              |                       |                      |                   |                   |             |                   |             |
|------------|-----------|----------------|--------------|-----------------------|----------------------|-------------------|-------------------|-------------|-------------------|-------------|
| Haralson   | 26-Mar-20 | 1<br>(Poisson) | 78/81 (96%)  | 0.6 (0.27, 0.86)      | 0.064 (0, 0.3)       | 1.00 (1.00, 1.00) | 0.90 (0.35, 1.85) | 0.95 (0.39) | 1.05 (0.60, 1.68) | 1.07 (0.28) |
| Heard      | 20-Mar-20 | 1<br>(Poisson) | 84/87 (97%)  | 0.12 (0.052,<br>0.23) | 0.57 (0.23,<br>0.89) | 1.10 (1.00, 1.10) | 1.44 (0.65, 2.71) | 1.50 (0.53) | 0.97 (0.48, 1.72) | 1.01 (0.32) |
| Henry      | 13-Mar-20 | 5              | 81/94 (86%)  | 5.2 (2.3, 9.6)        | 0.11 (0, 0.25)       | 1.00 (1.00, 1.00) | 1.16 (0.93, 1.43) | 1.17 (0.13) | 1.14 (0.97, 1.34) | 1.15 (0.09) |
| Jasper     | 24-Mar-20 | 2              | 83/83 (100%) | 0.23 (0.05, 0.75)     | 0.48 (0, 1.00)       | 1.10 (1.00, 1.20) | 0.89 (0.42, 1.62) | 0.93 (0.31) | 1.07 (0.67, 1.60) | 1.08 (0.24) |
| Lamar      | 20-Mar-20 | 5              | 86/87 (99%)  | 0.51 (0.06, 1.10)     | 0.24 (0, 0.93)       | 1.00 (1.00, 1.20) | 0.68 (0.20, 1.63) | 0.74 (0.37) | 0.79 (0.43, 1.30) | 0.81 (0.22) |
| Meriwether | 24-Mar-20 | 5              | 83/84 (99%)  | 0.78 (0.12, 1.80)     | 0.23 (0, 0.70)       | 1.00 (1.00, 1.10) | 1.07 (0.66, 1.61) | 1.08 (0.24) | 1.19 (0.86, 1.59) | 1.20 (0.19) |
| Morgan     | 23-Mar-20 | 5              | 84/84 (100%) | 0.36 (0.05, 0.78)     | 0.16 (0, 1.00)       | 1.00 (1.00, 1.20) | 1.05 (0.15, 3.50) | 1.25 (0.89) | 1.10 (0.33, 2.63) | 1.20 (0.60) |
| Newton     | 15-Mar-20 | 10             | 92/92 (100%) | 1.9 (0.36, 4.80)      | 0.22 (0, 0.53)       | 1.00 (1.00, 1.10) | 0.91 (0.61, 1.31) | 0.92 (0.18) | 0.92 (0.71, 1.17) | 0.93 (0.12) |
| Paulding   | 16-Mar-20 | 5              | 91/91 (100%) | 1.8 (0.57, 4.40)      | 0.22 (0, 0.43)       | 1.00 (1.00, 1.00) | 1.15 (0.87, 1.49) | 1.16 (0.16) | 1.00 (0.79, 1.24) | 1.01 (0.11) |
| Pickens    | 20-Mar-20 | 10             | 87/87 (100%) | 0.29 (0.04, 1.10)     | 0.43 (0, 1.00)       | 1.10 (1.00, 1.20) | 1.48 (0.83, 2.40) | 1.51 (0.40) | 1.29 (0.78, 1.99) | 1.32 (0.31) |
| Pike       | 28-Mar-20 | 5              | 79/79 (100%) | 0.65 (0.07, 1.30)     | 0.15 (0, 0.85)       | 1.00 (1.00, 1.20) | 1.11 (0.52, 2.01) | 1.15 (0.38) | 1.24 (0.73, 1.96) | 1.27 (0.32) |
| Rockdale   | 19-Mar-20 | 10             | 88/88 (100%) | 2.9 (0.65, 5.20)      | 0.07 (0, 0.38)       | 1.00 (1.00, 1.00) | 1.18 (0.82, 1.63) | 1.19 (0.21) | 1.13 (0.86, 1.45) | 1.13 (0.15) |
| Spalding   | 20-Mar-20 | 20             | 86/87 (99%)  | 2.4 (0.12, 5.20)      | 0.15 (0, 0.75)       | 1.00 (1.00, 1.10) | 1.04 (0.66, 1.56) | 1.06 (0.23) | 1.06 (0.77, 1.43) | 1.07 (0.17) |
| Walton     | 24-Mar-20 | 10             | 78/79 (99%)  | 1.6 (0.24, 4.60)      | 0.26 (0, 0.64)       | 1.00 (1.00, 1.10) | 0.81 (0.54, 1.17) | 0.82 (0.16) | 0.82 (0.63, 1.05) | 0.82 (0.11) |

Note. All data collection concluded on June 14, 2020. <sup>1</sup>NBD = negative binomial distribution of the underlying error structure.

## Figure Legends

Figure 1. Comparison between  $R_t$  for Georgia, USA, March 2—June 14, 2020, estimated using the instantaneous reproduction number method implemented in EpiEstim package (red: 1-week window and blue: 2-week window) and that using the Generalized Growth Model (GGM) (black). Solid lines represent the median estimates and the dashed line represent the 2.5 and 97.5 quantiles.

Figure 2. Comparison between  $R_t$  for Metro Atlanta, GA, March 2—June 14, 2020, estimated using the instantaneous reproduction number method implemented in EpiEstim package (red: 1-week window and blue: 2-week window) and that using the Generalized Growth Model (GGM) (black). Solid lines represent the median estimates and the dashed line represent the 2.5 and 97.5 quantiles.

Figure 3. Comparison between  $R_t$  for Dougherty, GA, March 2—June 14, 2020, estimated using the instantaneous reproduction number method implemented in EpiEstim package (red: 1-week window and blue: 2-week window) and that using the Generalized Growth Model (GGM) (black). Solid lines represent the median estimates and the dashed line represent the 2.5 and 97.5 quantiles.

# Georgia, USA

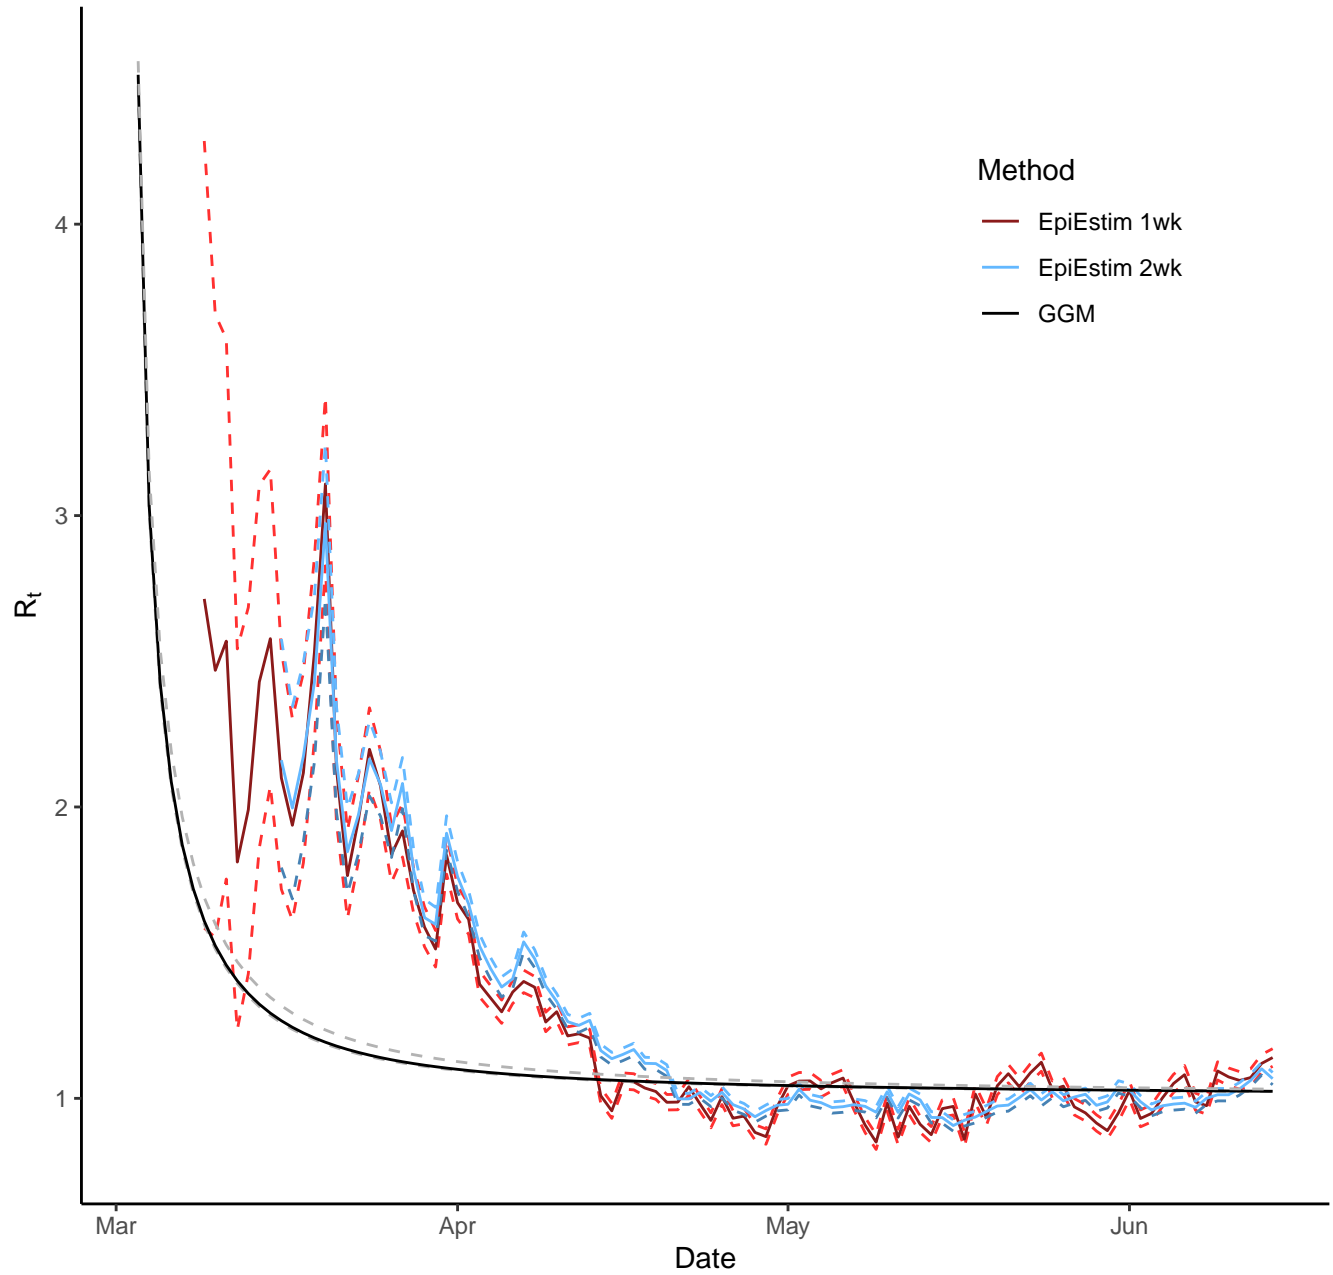

# Metro Atlanta

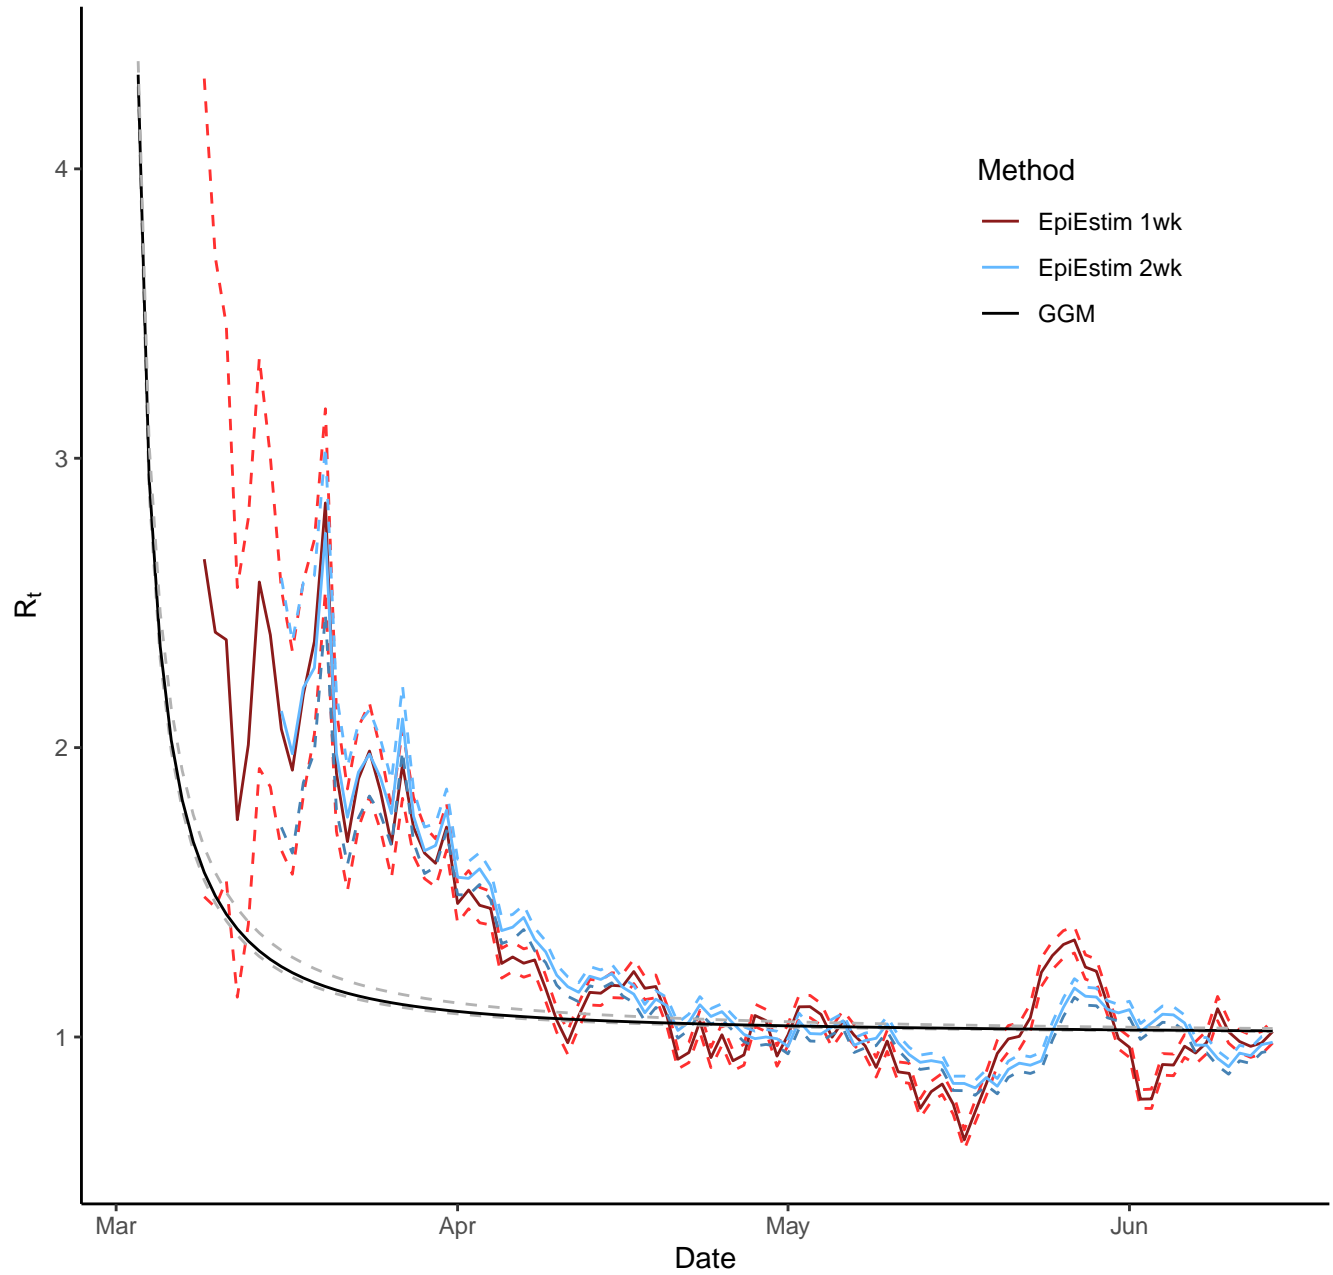

# Dougherty

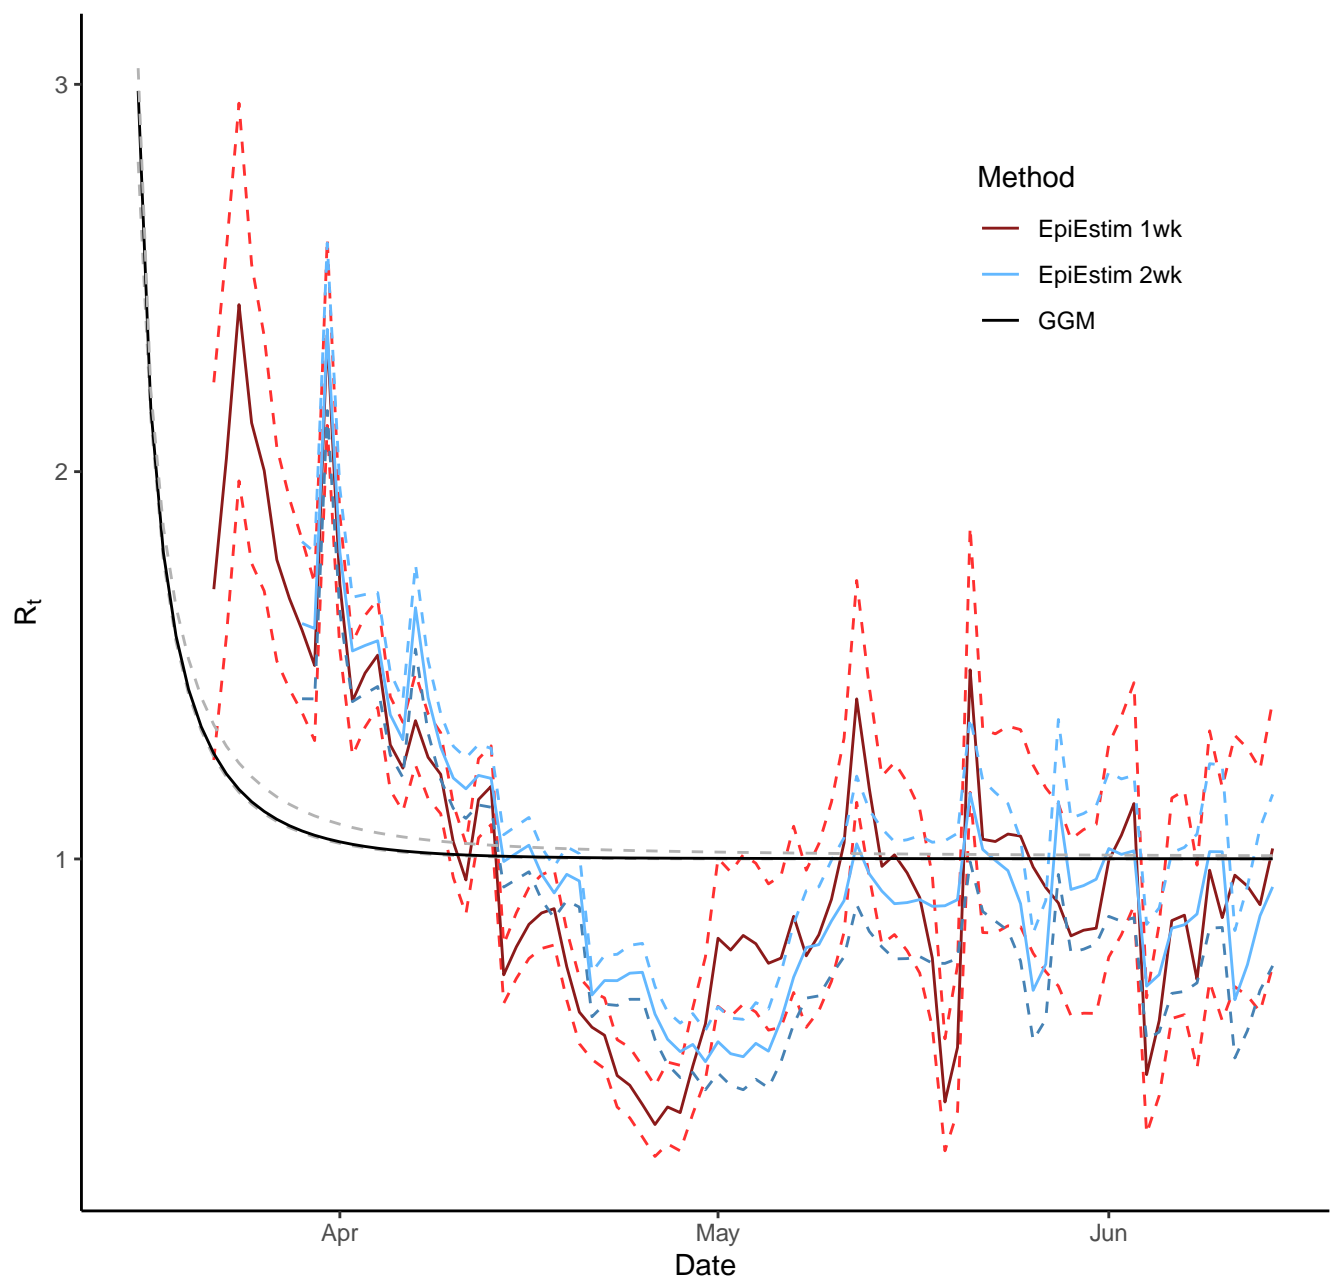



**Time-varying reproduction numbers of COVID-19 in Georgia, USA, March 2-June 14,  
2020: comparison of two estimation methods**

**Online Supplementary Materials**

Kamalich Muniz-Rodriguez<sup>1</sup>, MPH; Gerardo Chowell<sup>1</sup>, PhD; Jessica S. Schwind, PhD; Randall Ford, DDS; Sylvia K. Ofori, MPH; Chigozie A. Ogwara, BS; Margaret R. Davies, BS; Terrence Jacobs, BS; Chi-Hin Cheung, MS; Logan T. Cowan, PhD; Andrew R. Hansen, DrPH; Isaac Chun-Hai Fung\*, PhD

<sup>1</sup> These authors contribute equally as co-first authors

Author affiliations: Georgia Southern University (K. Muniz-Rodriguez, J. S. Schwind, R. Ford, S. K. Ofori, C. A. Ogwara, M. R. Davies, T. Jacobs, L. T. Cowan, A. R. Hansen, I. C.-H. Fung); Georgia State University (G. Chowell); Independent researcher, Hong Kong (C.-H. Cheung)

\*Correspondence should be addressed to: I. C. H. Fung, Department of Biostatistics, Epidemiology and Environmental Health Sciences, Jiann-Ping Hsu College of Public Health, Georgia Southern University. Telephone: 912-478-5079. Email: [cfung@georgiasouthern.edu](mailto:cfung@georgiasouthern.edu)



**Table S2.** Daily number of COVID-19 cases reported in the state of Georgia, Dougherty County and Metro Atlanta counties, from March 26—April 18, 2020.

| Location      | March |     |     |     |     |      | April |     |     |     |     |     |      |      |     |     |     |     |      |     |     |      |      |      |
|---------------|-------|-----|-----|-----|-----|------|-------|-----|-----|-----|-----|-----|------|------|-----|-----|-----|-----|------|-----|-----|------|------|------|
|               | 26    | 27  | 28  | 29  | 30  | 31   | 1     | 2   | 3   | 4   | 5   | 6   | 7    | 8    | 9   | 10  | 11  | 12  | 13   | 14  | 15  | 16   | 17   | 18   |
| Georgia       | 256   | 555 | 249 | 236 | 349 | 1085 | 631   | 696 | 523 | 416 | 359 | 816 | 1598 | 1048 | 681 | 974 | 402 | 191 | 1169 | 292 | 670 | 1061 | 1014 | 1183 |
| Dougherty     | 41    | 39  | 21  | 23  | 31  | 188  | 24    | 31  | 86  | 78  | 3   | 34  | 251  | 28   | 41  | 30  | 30  | 76  | 67   | 52  | 23  | 38   | 27   | 24   |
| Metro Atlanta | 125   | 397 | 141 | 182 | 283 | 483  | 154   | 370 | 556 | 355 | 84  | 430 | 576  | 314  | 302 | 380 | 167 | 241 | 642  | 674 | 483 | 427  | 642  | 191  |
| Bartow        | 11    | 14  | 10  | 2   | 6   | 12   | 10    | 6   | 6   | 1   | 0   | 22  | 9    | 4    | 8   | 5   | 3   | 2   | 10   | 7   | 7   | 3    | 5    | 1    |
| Butts         | 0     | 0   | 2   | 0   | 1   | 2    | 0     | 1   | 0   | 1   | 2   | 5   | 1    | 5    | 2   | 2   | 1   | 1   | 1    | 5   | 1   | 2    | 2    | 1    |
| Carroll       | 2     | 9   | 3   | 6   | 27  | 26   | 10    | 6   | 8   | 11  | 0   | 5   | 20   | 1    | 11  | 5   | 4   | 6   | 19   | 6   | 7   | 16   | 3    | 10   |
| Cherokee      | 8     | 6   | 4   | 6   | 9   | 9    | 7     | 9   | 20  | 6   | 4   | 17  | 6    | 8    | 12  | 10  | 9   | 1   | 17   | 15  | 13  | 13   | 29   | 11   |
| Clayton       | 8     | 16  | 4   | 2   | 3   | 50   | 16    | 37  | 41  | 29  | 3   | 16  | 24   | 11   | 9   | 30  | 11  | 33  | 24   | 39  | 27  | 11   | 26   | 6    |
| Cobb          | 10    | 44  | 22  | 43  | 22  | 37   | 17    | 37  | 81  | 31  | 21  | 43  | 49   | 42   | 45  | 28  | 24  | 23  | 88   | 79  | 55  | 64   | 71   | 19   |
| Coweta        | 4     | 5   | 1   | 3   | 14  | 4    | 1     | 6   | 8   | 8   | 3   | 9   | 4    | 2    | 5   | 13  | 1   | 5   | 15   | 14  | 3   | 4    | 11   | 7    |
| Dawson        | 2     | 0   | 0   | 1   | 3   | 3    | 1     | 0   | 2   | 3   | 0   | 2   | 2    | 3    | 1   | 1   | 0   | 1   | 6    | 4   | 1   | 2    | 3    | 1    |
| DeKalb        | 12    | 82  | 27  | 27  | 21  | 66   | 0     | 49  | 74  | 56  | 10  | 51  | 73   | 59   | 34  | 60  | 22  | 45  | 113  | 138 | 81  | 35   | 106  | 42   |
| Douglas       | 0     | 14  | 3   | 3   | 5   | 8    | 5     | 10  | 12  | 6   | 7   | 14  | 12   | 7    | 10  | 14  | 3   | 8   | 18   | 12  | 12  | 8    | 13   | 7    |
| Fayette       | 2     | 8   | 4   | 1   | 15  | 6    | 0     | 7   | 6   | 5   | 1   | 7   | 7    | 9    | 3   | 0   | 6   | 1   | 6    | 9   | 7   | 4    | 8    | 2    |
| Forsyth       | 5     | 6   | 1   | 6   | 8   | 11   | 3     | 3   | 8   | 10  | 2   | 12  | 14   | 0    | 10  | 10  | 9   | 5   | 10   | 10  | 4   | 12   | 16   | 12   |
| Fulton        | 27    | 116 | 31  | 47  | 78  | 96   | 39    | 109 | 163 | 49  | 11  | 83  | 132  | 76   | 75  | 81  | 29  | 49  | 140  | 177 | 90  | 43   | 92   | 28   |
| Gwinnett      | 10    | 42  | 10  | 14  | 33  | 64   | 15    | 46  | 50  | 47  | 10  | 45  | 85   | 46   | 32  | 51  | 12  | 20  | 65   | 49  | 70  | 32   | 120  | 22   |
| Hall          | 3     | 8   | 1   | 2   | 1   | 33   | 4     | 1   | 9   | 36  | 0   | 21  | 77   | 18   | 14  | 26  | 3   | 6   | 37   | 44  | 39  | 124  | 79   | 2    |
| Haralson      | 1     | 0   | 1   | 0   | 2   | 1    | 1     | 0   | 4   | 0   | 0   | 4   | 0    | 1    | 0   | 0   | 1   | 0   | 2    | 1   | 0   | 0    | 1    | 0    |
| Heard         | 0     | 0   | 0   | 0   | 0   | 0    | 1     | 0   | 0   | 0   | 0   | 0   | 1    | 0    | 0   | 0   | 1   | 0   | 0    | 1   | 0   | 0    | 0    | 2    |
| Henry         | 9     | 15  | 6   | 6   | 12  | 18   | 9     | 20  | 28  | 24  | 1   | 13  | 27   | 11   | 14  | 16  | 5   | 9   | 26   | 17  | 22  | 2    | 20   | 5    |
| Jasper        | 0     | 0   | 0   | 0   | 0   | 0    | 0     | 0   | 0   | 2   | 0   | 0   | 2    | 0    | 0   | 0   | 0   | 2   | 1    | 0   | 1   | 0    | 4    | 1    |
| Lamar         | 0     | 0   | 0   | 0   | 0   | 0    | 1     | 2   | 0   | 1   | 0   | 8   | 0    | 0    | 0   | 0   | 0   | 2   | 1    | 2   | 1   | 0    | 1    | 2    |
| Meriwether    | 2     | 0   | 0   | 2   | 1   | 0    | 1     | 2   | 1   | 1   | 0   | 4   | 3    | 0    | 0   | 1   | 4   | 0   | 0    | 1   | 4   | 7    | 5    | 0    |
| Morgan        | 0     | 0   | 0   | 0   | 0   | 1    | 0     | 0   | 0   | 0   | 0   | 4   | 4    | 2    | 1   | 1   | 0   | 0   | 1    | 0   | 2   | 2    | 0    | 1    |
| Newton        | 4     | 3   | 0   | 3   | 4   | 9    | 3     | 3   | 5   | 10  | 3   | 10  | 2    | 0    | 3   | 7   | 1   | 4   | 11   | 7   | 13  | 2    | 6    | 0    |
| Paulding      | 1     | 6   | 7   | 3   | 3   | 5    | 2     | 2   | 11  | 4   | 1   | 6   | 5    | 4    | 3   | 5   | 5   | 5   | 16   | 15  | 3   | 5    | 9    | 1    |
| Pickens       | 0     | 0   | 1   | 0   | 1   | 1    | 0     | 2   | 0   | 0   | 0   | 0   | 1    | 0    | 0   | 0   | 1   | 0   | 0    | 2   | 1   | 1    | 1    | 2    |
| Pike          | 0     | 0   | 1   | 1   | 0   | 0    | 0     | 0   | 2   | 1   | 0   | 4   | 1    | 1    | 1   | 3   | 1   | 0   | 3    | 3   | 3   | 3    | 1    | 1    |
| Rockdale      | 3     | 3   | 1   | 1   | 11  | 16   | 2     | 10  | 10  | 8   | 2   | 5   | 3    | 0    | 0   | 4   | 3   | 5   | 4    | 5   | 1   | 4    | 6    | 2    |
| Spalding      | 1     | 0   | 0   | 1   | 2   | 1    | 2     | 0   | 6   | 3   | 0   | 18  | 10   | 2    | 4   | 5   | 4   | 4   | 5    | 5   | 13  | 26   | 2    | 2    |
| Walton        | 0     | 0   | 1   | 2   | 1   | 4    | 4     | 2   | 1   | 2   | 3   | 2   | 2    | 2    | 5   | 2   | 4   | 4   | 3    | 7   | 2   | 2    | 2    | 1    |

**Table S3.** Daily number of COVID-19 cases reported in the state of Georgia, Dougherty County and Metro Atlanta counties, April 19—May 2, 2020.

| Location      | April |     |     |     |     |     |     |     |     |     |     |      | May  |     |
|---------------|-------|-----|-----|-----|-----|-----|-----|-----|-----|-----|-----|------|------|-----|
|               | 19    | 20  | 21  | 22  | 23  | 24  | 25  | 26  | 27  | 28  | 29  | 30   | 1    | 2   |
| Georgia       | 605   | 828 | 742 | 910 | 806 | 670 | 650 | 234 | 770 | 378 | 693 | 1131 | 1005 | 832 |
| Dougherty     | 16    | 11  | 20  | 0   | 0   | 9   | 5   | 0   | 10  | 13  | 7   | 6    | 25   | 3   |
| Metro Atlanta | 384   | 470 | 246 | 432 | 668 | 322 | 349 | 121 | 469 | 560 | 473 | 368  | 466  | 628 |
| Bartow        | 4     | 5   | 1   | 3   | 5   | 9   | 10  | 3   | 3   | 17  | 3   | 6    | 8    | 1   |
| Butts         | 9     | 30  | 1   | 44  | 0   | 0   | 0   | 1   | 0   | 4   | 4   | 11   | 6    | 0   |
| Carroll       | 11    | 23  | 8   | 0   | 10  | 6   | 5   | 1   | 3   | 13  | 6   | 10   | 17   | 8   |
| Cherokee      | 15    | 17  | 7   | 16  | 25  | 2   | 1   | 6   | 19  | 43  | 21  | 10   | 7    | 8   |
| Clayton       | 15    | 20  | 7   | 2   | 67  | 13  | 12  | 0   | 8   | 23  | 21  | 23   | 17   | 44  |
| Cobb          | 44    | 48  | 34  | 42  | 54  | 42  | 27  | 33  | 55  | 56  | 42  | 40   | 58   | 70  |
| Coweta        | 4     | 5   | 0   | 0   | 8   | 10  | 0   | 1   | 2   | 1   | 4   | 0    | 16   | 2   |
| Dawson        | 1     | 1   | 0   | 4   | 1   | 1   | 0   | 0   | 2   | 5   | 2   | 1    | 0    | 5   |
| DeKalb        | 65    | 47  | 43  | 46  | 80  | 32  | 67  | 12  | 55  | 52  | 73  | 47   | 46   | 75  |
| Douglas       | 4     | 10  | 3   | 13  | 14  | 3   | 0   | 2   | 6   | 16  | 11  | 8    | 10   | 6   |
| Fayette       | 3     | 4   | 1   | 2   | 10  | 2   | 3   | 0   | 8   | 2   | 5   | 0    | 2    | 3   |
| Forsyth       | 5     | 9   | 5   | 11  | 8   | 6   | 8   | 3   | 19  | 13  | 8   | 7    | 10   | 22  |
| Fulton        | 66    | 67  | 8   | 49  | 181 | 64  | 43  | 2   | 135 | 73  | 32  | 36   | 59   | 48  |
| Gwinnett      | 65    | 57  | 57  | 35  | 78  | 31  | 78  | 44  | 41  | 75  | 124 | 49   | 55   | 86  |
| Hall          | 18    | 77  | 54  | 151 | 56  | 59  | 10  | 1   | 65  | 87  | 76  | 85   | 136  | 212 |
| Haralson      | 0     | 2   | 3   | 0   | 1   | 0   | 0   | 0   | 1   | 1   | 0   | 0    | 1    | 0   |
| Heard         | 0     | 0   | 1   | 0   | 1   | 0   | 0   | 0   | 1   | 0   | 0   | 0    | 1    | 0   |
| Henry         | 16    | 11  | 2   | 2   | 27  | 6   | 17  | 15  | 13  | 24  | 4   | 0    | 0    | 20  |
| Jasper        | 2     | 0   | 1   | 0   | 1   | 1   | 0   | 0   | 0   | 2   | 0   | 0    | 0    | 1   |
| Lamar         | 1     | 2   | 2   | 0   | 2   | 0   | 2   | 0   | 1   | 1   | 2   | 1    | 1    | 1   |
| Meriwether    | 2     | 4   | 1   | 1   | 1   | 0   | 0   | 0   | 0   | 4   | 1   | 0    | 0    | 0   |
| Morgan        | 2     | 0   | 1   | 0   | 2   | 0   | 0   | 0   | 0   | 0   | 2   | 0    | 0    | 0   |
| Newton        | 9     | 9   | 3   | 4   | 7   | 5   | 8   | 0   | 7   | 11  | 9   | 3    | 4    | 5   |
| Paulding      | 4     | 4   | 0   | 4   | 3   | 8   | 3   | 1   | 6   | 6   | 4   | 13   | 1    | 4   |
| Pickens       | 0     | 0   | 0   | 0   | 1   | 1   | 0   | 1   | 0   | 5   | 0   | 0    | 0    | 1   |
| Pike          | 3     | 0   | 1   | 1   | 3   | 0   | 1   | 0   | 0   | 0   | 0   | 1    | 0    | 0   |
| Rockdale      | 12    | 9   | 1   | 3   | 7   | 7   | 3   | 0   | 5   | 9   | 3   | 11   | 2    | 3   |
| Spalding      | 2     | 7   | 1   | 0   | 4   | 4   | 45  | 1   | 7   | 4   | 4   | 5    | 4    | 1   |
| Walton        | 2     | 2   | 0   | 10  | 8   | 11  | 5   | 0   | 3   | 13  | 8   | 5    | 3    | 3   |

**Table S4.** Daily number of COVID-19 cases reported in the state of Georgia, Dougherty County and Metro Atlanta counties, May 3—26, 2020.

| Location      | May |     |     |     |     |     |     |     |     |     |     |     |     |     |     |     |     |     |     |     |     |     |     |     |
|---------------|-----|-----|-----|-----|-----|-----|-----|-----|-----|-----|-----|-----|-----|-----|-----|-----|-----|-----|-----|-----|-----|-----|-----|-----|
|               | 3   | 4   | 5   | 6   | 7   | 8   | 9   | 10  | 11  | 12  | 13  | 14  | 15  | 16  | 17  | 18  | 19  | 20  | 21  | 22  | 23  | 24  | 25  | 26  |
| Georgia       | 350 | 732 | 526 | 848 | 800 | 565 | 392 | 786 | 181 | 863 | 555 | 556 | 820 | 413 | 299 | 680 | 580 | 948 | 807 | 765 | 674 | 581 | 425 | 652 |
| Dougherty     | 2   | 7   | 7   | 5   | 11  | 17  | 4   | 6   | 16  | 34  | 1   | 0   | 18  | 0   | 0   | 2   | 4   | 4   | 44  | 7   | 2   | 2   | 3   | 0   |
| Metro Atlanta | 236 | 478 | 384 | 620 | 264 | 349 | 359 | 407 | 162 | 282 | 207 | 267 | 316 | 131 | 38  | 224 | 378 | 365 | 372 | 363 | 277 | 400 | 521 | 695 |
| Bartow        | 1   | 16  | 10  | 8   | 0   | 2   | 0   | 2   | 1   | 4   | 9   | 5   | 3   | 0   | 0   | 11  | 14  | 9   | 5   | 3   | 17  | 0   | 0   | 8   |
| Butts         | 0   | 0   | 5   | 5   | 4   | 4   | 1   | 8   | 9   | 2   | 1   | 4   | 0   | 1   | 0   | 2   | 0   | 6   | 0   | 1   | 2   | 1   | 2   | 3   |
| Carroll       | 0   | 4   | 1   | 2   | 0   | 1   | 3   | 2   | 0   | 2   | 0   | 3   | 8   | 0   | 0   | 0   | 10  | 7   | 12  | 2   | 1   | 5   | 27  | 18  |
| Cherokee      | 9   | 18  | 10  | 25  | 25  | 9   | 15  | 16  | 12  | 14  | 20  | 21  | 19  | 5   | 14  | 9   | 22  | 13  | 11  | 21  | 17  | 3   | 21  | 19  |
| Clayton       | 16  | 11  | 9   | 36  | 29  | 10  | 13  | 20  | 23  | 7   | 4   | 28  | 16  | 3   | 3   | 4   | 1   | 24  | 13  | 24  | 18  | 30  | 13  | 41  |
| Cobb          | 19  | 71  | 48  | 111 | 26  | 48  | 56  | 47  | 11  | 67  | 27  | 83  | 32  | 11  | 0   | 23  | 74  | 81  | 41  | 30  | 6   | 41  | 93  | 59  |
| Coweta        | 17  | 12  | 2   | 2   | 11  | 0   | 8   | 11  | 2   | 2   | 0   | 0   | 2   | 3   | 0   | 0   | 1   | 0   | 17  | 8   | 5   | 15  | 45  | 7   |
| Dawson        | 0   | 1   | 0   | 5   | 1   | 2   | 0   | 0   | 0   | 1   | 5   | 3   | 0   | 0   | 0   | 0   | 2   | 9   | 4   | 2   | 0   | 0   | 2   | 1   |
| DeKalb        | 36  | 71  | 29  | 73  | 39  | 49  | 44  | 47  | 19  | 50  | 27  | 32  | 87  | 49  | 2   | 54  | 62  | 61  | 59  | 42  | 66  | 111 | 48  | 116 |
| Douglas       | 6   | 2   | 10  | 10  | 3   | 32  | 2   | 14  | 3   | 0   | 5   | 7   | 4   | 5   | 0   | 1   | 6   | 7   | 3   | 23  | 9   | 3   | 14  | 13  |
| Fayette       | 2   | 4   | 2   | 0   | 1   | 0   | 5   | 4   | 2   | 1   | 0   | 2   | 1   | 1   | 1   | 3   | 2   | 0   | 0   | 3   | 4   | 1   | 1   | 11  |
| Forsyth       | 1   | 9   | 6   | 9   | 5   | 3   | 2   | 22  | 0   | 0   | 5   | 2   | 2   | 1   | 1   | 6   | 7   | 22  | 9   | 1   | 2   | 3   | 31  | 12  |
| Fulton        | 53  | 76  | 108 | 85  | 10  | 57  | 68  | 124 | 7   | 79  | 19  | 11  | 78  | 46  | 10  | 0   | 36  | 0   | 77  | 59  | 46  | 77  | 26  | 150 |
| Gwinnett      | 46  | 77  | 45  | 120 | 32  | 68  | 81  | 44  | 28  | 20  | 15  | 42  | 45  | 0   | 0   | 83  | 91  | 49  | 62  | 79  | 36  | 59  | 142 | 109 |
| Hall          | 6   | 76  | 70  | 68  | 42  | 41  | 5   | 10  | 27  | 21  | 52  | 13  | 15  | 6   | 4   | 14  | 27  | 39  | 18  | 21  | 36  | 17  | 5   | 51  |
| Haralson      | 0   | 0   | 1   | 1   | 1   | 0   | 0   | 0   | 0   | 1   | 1   | 0   | 0   | 0   | 0   | 0   | 1   | 0   | 1   | 0   | 0   | 0   | 0   | 4   |
| Heard         | 3   | 0   | 0   | 0   | 0   | 0   | 0   | 0   | 1   | 2   | 0   | 0   | 0   | 0   | 0   | 0   | 3   | 3   | 1   | 2   | 0   | 0   | 2   | 0   |
| Henry         | 8   | 0   | 7   | 19  | 12  | 8   | 27  | 11  | 6   | 0   | 1   | 0   | 0   | 0   | 0   | 0   | 0   | 4   | 8   | 4   | 0   | 5   | 9   | 14  |
| Jasper        | 1   | 1   | 0   | 1   | 0   | 0   | 0   | 0   | 0   | 0   | 0   | 0   | 0   | 0   | 0   | 0   | 0   | 0   | 0   | 5   | 0   | 0   | 0   | 1   |
| Lamar         | 0   | 0   | 0   | 0   | 0   | 0   | 0   | 1   | 0   | 0   | 0   | 1   | 0   | 0   | 0   | 0   | 3   | 0   | 2   | 4   | 0   | 1   | 2   | 4   |
| Meriwether    | 0   | 2   | 1   | 2   | 2   | 1   | 3   | 0   | 1   | 0   | 2   | 4   | 0   | 0   | 0   | 0   | 0   | 1   | 3   | 2   | 0   | 0   | 0   | 0   |
| Morgan        | 0   | 1   | 1   | 0   | 0   | 0   | 2   | 1   | 0   | 0   | 0   | 0   | 0   | 0   | 0   | 1   | 0   | 0   | 0   | 1   | 1   | 0   | 1   | 0   |
| Newton        | 3   | 7   | 7   | 10  | 4   | 4   | 12  | 6   | 2   | 1   | 0   | 0   | 0   | 0   | 3   | 0   | 2   | 9   | 5   | 6   | 3   | 15  | 7   | 24  |
| Paulding      | 1   | 12  | 2   | 3   | 6   | 3   | 1   | 1   | 3   | 4   | 4   | 2   | 4   | 0   | 0   | 1   | 6   | 14  | 3   | 9   | 2   | 2   | 14  | 3   |
| Pickens       | 2   | 0   | 0   | 0   | 2   | 1   | 1   | 0   | 0   | 2   | 1   | 0   | 0   | 0   | 0   | 2   | 1   | 0   | 1   | 1   | 2   | 0   | 0   | 0   |
| Pike          | 0   | 0   | 0   | 0   | 1   | 0   | 0   | 3   | 0   | 0   | 0   | 0   | 0   | 0   | 0   | 0   | 0   | 1   | 0   | 3   | 0   | 1   | 1   | 2   |
| Rockdale      | 1   | 4   | 5   | 19  | 3   | 2   | 2   | 9   | 4   | 2   | 3   | 1   | 0   | 0   | 0   | 1   | 1   | 0   | 3   | 3   | 1   | 7   | 2   | 1   |
| Spalding      | 4   | 0   | 3   | 1   | 1   | 3   | 5   | 3   | 1   | 0   | 0   | 3   | 0   | 0   | 0   | 3   | 4   | 0   | 0   | 4   | 3   | 0   | 6   | 3   |
| Walton        | 1   | 3   | 2   | 5   | 4   | 1   | 3   | 1   | 0   | 0   | 6   | 0   | 0   | 0   | 0   | 6   | 2   | 6   | 14  | 0   | 0   | 3   | 7   | 21  |

**Table S5.** Daily number of COVID-19 cases reported in the state of Georgia, Dougherty County and Metro Atlanta counties, May 27—June 14, 2020.

| Location      | May |     |     |     |     | June |     |     |     |     |     |     |     |     |     |     |     |     |     |
|---------------|-----|-----|-----|-----|-----|------|-----|-----|-----|-----|-----|-----|-----|-----|-----|-----|-----|-----|-----|
|               | 27  | 28  | 29  | 30  | 31  | 1    | 2   | 3   | 4   | 5   | 6   | 7   | 8   | 9   | 10  | 11  | 12  | 13  | 14  |
| Georgia       | 647 | 650 | 525 | 448 | 715 | 706  | 306 | 648 | 817 | 752 | 663 | 428 | 624 | 774 | 696 | 867 | 869 | 977 | 696 |
| Dougherty     | 0   | 40  | 0   | 0   | 0   | 10   | 4   | 6   | 4   | 2   | 7   | 0   | 3   | 12  | 2   | 7   | 1   | 5   | 4   |
| Metro Atlanta | 675 | 417 | 513 | 118 | 91  | 374  | 105 | 508 | 576 | 463 | 233 | 32  | 439 | 385 | 404 | 509 | 405 | 236 | 115 |
| Bartow        | 6   | 11  | 8   | 1   | 0   | 3    | 4   | 11  | 8   | 10  | 7   | 1   | 1   | 4   | 3   | 2   | 7   | 3   | 1   |
| Butts         | 5   | 4   | 6   | 0   | 0   | 0    | 5   | 3   | 3   | 2   | 1   | 0   | 0   | 0   | 0   | 0   | 0   | 0   | 2   |
| Carroll       | 22  | 4   | 1   | 1   | 6   | 0    | 0   | 11  | 33  | 10  | 2   | 0   | 5   | 2   | 4   | 2   | 9   | 9   | 3   |
| Cherokee      | 11  | 8   | 16  | 5   | 19  | 1    | 1   | 12  | 11  | 10  | 14  | 1   | 16  | 3   | 12  | 10  | 14  | 3   | 12  |
| Clayton       | 16  | 15  | 13  | 0   | 5   | 13   | 4   | 22  | 22  | 28  | 13  | 5   | 15  | 19  | 16  | 21  | 14  | 14  | 4   |
| Cobb          | 53  | 41  | 39  | 22  | 18  | 25   | 4   | 41  | 68  | 58  | 19  | 7   | 49  | 39  | 33  | 101 | 51  | 35  | 24  |
| Coweta        | 14  | 6   | 11  | 1   | 2   | 4    | 1   | 10  | 8   | 18  | 5   | 0   | 5   | 6   | 2   | 12  | 19  | 2   | 2   |
| Dawson        | 4   | 0   | 1   | 0   | 0   | 0    | 0   | 1   | 0   | 2   | 1   | 0   | 1   | 0   | 2   | 2   | 0   | 0   | 0   |
| DeKalb        | 152 | 62  | 83  | 13  | 3   | 61   | 8   | 71  | 65  | 47  | 22  | 4   | 42  | 66  | 66  | 43  | 53  | 21  | 8   |
| Douglas       | 4   | 7   | 11  | 0   | 4   | 3    | 3   | 7   | 15  | 12  | 9   | 0   | 9   | 11  | 12  | 10  | 7   | 10  | 4   |
| Fayette       | 3   | 0   | 0   | 0   | 0   | 0    | 2   | 2   | 2   | 3   | 1   | 0   | 2   | 7   | 0   | 4   | 1   | 1   | 1   |
| Forsyth       | 10  | 5   | 5   | 0   | 0   | 11   | 9   | 2   | 1   | 6   | 5   | 0   | 10  | 19  | 4   | 0   | 10  | 5   | 1   |
| Fulton        | 79  | 58  | 123 | 17  | 17  | 97   | 17  | 50  | 36  | 66  | 32  | 1   | 64  | 38  | 64  | 42  | 38  | 31  | 6   |
| Gwinnett      | 173 | 139 | 114 | 36  | 11  | 90   | 21  | 172 | 204 | 105 | 61  | 7   | 158 | 94  | 116 | 172 | 109 | 52  | 31  |
| Hall          | 44  | 28  | 15  | 2   | 0   | 40   | 1   | 31  | 27  | 30  | 19  | 1   | 26  | 22  | 22  | 13  | 28  | 13  | 7   |
| Haralson      | 0   | 2   | 1   | 0   | 0   | 2    | 2   | 2   | 1   | 1   | 1   | 0   | 0   | 2   | 2   | 0   | 1   | 0   | 0   |
| Heard         | 2   | 2   | 0   | 1   | 1   | 0    | 1   | 0   | 1   | 0   | 0   | 0   | 0   | 1   | 2   | 2   | 1   | 0   | 1   |
| Henry         | 17  | 0   | 14  | 2   | 2   | 3    | 2   | 21  | 26  | 9   | 5   | 0   | 11  | 12  | 8   | 23  | 19  | 10  | 2   |
| Jasper        | 0   | 0   | 1   | 3   | 0   | 4    | 0   | 0   | 5   | 1   | 1   | 1   | 1   | 2   | 0   | 4   | 1   | 0   | 0   |
| Lamar         | 3   | 6   | 1   | 0   | 0   | 4    | 0   | 2   | 2   | 1   | 0   | 0   | 0   | 0   | 2   | 1   | 0   | 0   | 0   |
| Meriwether    | 3   | 1   | 2   | 1   | 0   | 1    | 1   | 8   | 4   | 6   | 1   | 0   | 3   | 1   | 4   | 5   | 4   | 2   | 0   |
| Morgan        | 0   | 0   | 0   | 0   | 0   | 1    | 0   | 0   | 0   | 1   | 0   | 0   | 0   | 1   | 0   | 0   | 0   | 0   | 0   |
| Newton        | 6   | 3   | 7   | 1   | 0   | 9    | 9   | 6   | 6   | 6   | 1   | 0   | 6   | 1   | 6   | 5   | 5   | 3   | 0   |
| Paulding      | 11  | 4   | 11  | 6   | 2   | 0    | 2   | 4   | 6   | 7   | 4   | 1   | 2   | 17  | 11  | 15  | 4   | 1   | 3   |
| Pickens       | 0   | 2   | 2   | 0   | 1   | 0    | 0   | 2   | 0   | 0   | 1   | 1   | 0   | 1   | 4   | 2   | 0   | 6   | 0   |
| Pike          | 2   | 0   | 0   | 0   | 0   | 0    | 0   | 2   | 1   | 2   | 1   | 1   | 1   | 2   | 1   | 0   | 1   | 3   | 0   |
| Rockdale      | 8   | 2   | 5   | 2   | 0   | 0    | 4   | 8   | 5   | 2   | 4   | 0   | 6   | 6   | 5   | 4   | 4   | 5   | 2   |
| Spalding      | 2   | 3   | 8   | 0   | 0   | 2    | 0   | 3   | 1   | 11  | 2   | 0   | 2   | 5   | 1   | 6   | 1   | 4   | 1   |
| Walton        | 25  | 4   | 15  | 4   | 0   | 0    | 4   | 4   | 15  | 9   | 1   | 1   | 4   | 4   | 2   | 8   | 4   | 3   | 0   |



**Table S7.** Cumulative number of reported COVID-19 cases in the state of Georgia, Dougherty County and Metro Atlanta counties, March 17—31, 2020.

| Date          | March |     |     |     |     |     |     |      |      |      |      |      |      |      |      |
|---------------|-------|-----|-----|-----|-----|-----|-----|------|------|------|------|------|------|------|------|
|               | 17    | 18  | 19  | 20  | 21  | 22  | 23  | 24   | 25   | 26   | 27   | 28   | 29   | 30   | 31   |
| Georgia       | 142   | 193 | 282 | 482 | 552 | 620 | 800 | 1097 | 1387 | 1643 | 2198 | 2447 | 2683 | 3032 | 4117 |
| Dougherty     | 6     | 7   | 22  | 45  | 47  | 52  | 69  | 101  | 123  | 164  | 203  | 224  | 247  | 278  | 466  |
| Metro Atlanta | 114   | 158 | 215 | 348 | 379 | 425 | 547 | 698  | 844  | 969  | 1366 | 1507 | 1689 | 1972 | 2455 |
| Bartow        | 11    | 20  | 27  | 54  | 55  | 56  | 61  | 76   | 82   | 93   | 107  | 117  | 119  | 125  | 137  |
| Butts         | 0     | 0   | 0   | 0   | 0   | 2   | 2   | 2    | 3    | 3    | 3    | 5    | 5    | 6    | 8    |
| Carroll       | 0     | 0   | 0   | 14  | 16  | 16  | 21  | 26   | 50   | 52   | 61   | 64   | 70   | 97   | 123  |
| Cherokee      | 4     | 6   | 13  | 16  | 17  | 18  | 24  | 30   | 36   | 44   | 50   | 54   | 60   | 69   | 78   |
| Clayton       | 5     | 6   | 6   | 10  | 12  | 13  | 19  | 21   | 29   | 37   | 53   | 57   | 59   | 62   | 112  |
| Cobb          | 25    | 29  | 38  | 51  | 56  | 67  | 79  | 90   | 109  | 119  | 163  | 185  | 228  | 250  | 287  |
| Coweta        | 3     | 3   | 3   | 6   | 8   | 9   | 9   | 10   | 10   | 14   | 19   | 20   | 23   | 37   | 41   |
| Dawson        | 0     | 0   | 0   | 1   | 1   | 1   | 1   | 1    | 1    | 3    | 3    | 3    | 4    | 7    | 10   |
| DeKalb        | 15    | 18  | 22  | 40  | 42  | 53  | 74  | 107  | 125  | 137  | 219  | 246  | 273  | 294  | 360  |
| Douglas       | 0     | 0   | 0   | 1   | 4   | 4   | 7   | 12   | 18   | 18   | 32   | 35   | 38   | 43   | 51   |
| Fayette       | 5     | 7   | 8   | 8   | 9   | 9   | 11  | 12   | 12   | 14   | 22   | 26   | 27   | 42   | 48   |
| Forsyth       | 1     | 2   | 3   | 3   | 4   | 5   | 7   | 8    | 10   | 15   | 21   | 22   | 28   | 36   | 47   |
| Fulton        | 33    | 49  | 68  | 95  | 100 | 111 | 152 | 191  | 204  | 231  | 347  | 378  | 425  | 503  | 599  |
| Gwinnett      | 7     | 7   | 12  | 23  | 23  | 27  | 35  | 46   | 69   | 79   | 121  | 131  | 145  | 178  | 242  |
| Hall          | 1     | 3   | 5   | 6   | 9   | 9   | 10  | 16   | 19   | 22   | 30   | 31   | 33   | 34   | 67   |
| Haralson      | 0     | 0   | 0   | 0   | 0   | 0   | 0   | 0    | 0    | 1    | 1    | 2    | 2    | 4    | 5    |
| Heard         | 0     | 0   | 0   | 1   | 1   | 1   | 1   | 1    | 1    | 1    | 1    | 1    | 1    | 1    | 1    |
| Henry         | 2     | 2   | 3   | 6   | 7   | 7   | 9   | 13   | 20   | 29   | 44   | 50   | 56   | 68   | 86   |
| Jasper        | 0     | 0   | 0   | 0   | 0   | 0   | 0   | 1    | 2    | 2    | 2    | 2    | 2    | 2    | 2    |
| Lamar         | 0     | 0   | 0   | 1   | 1   | 3   | 3   | 3    | 3    | 3    | 3    | 3    | 3    | 3    | 3    |
| Meriwether    | 0     | 0   | 0   | 0   | 0   | 0   | 0   | 1    | 1    | 3    | 3    | 3    | 5    | 6    | 6    |
| Morgan        | 0     | 0   | 0   | 0   | 0   | 0   | 1   | 1    | 1    | 1    | 1    | 1    | 1    | 1    | 2    |
| Newton        | 1     | 3   | 3   | 4   | 4   | 4   | 4   | 6    | 8    | 12   | 15   | 15   | 18   | 22   | 31   |
| Paulding      | 1     | 3   | 3   | 3   | 4   | 4   | 5   | 6    | 6    | 7    | 13   | 20   | 23   | 26   | 31   |
| Pickens       | 0     | 0   | 0   | 2   | 2   | 2   | 3   | 4    | 4    | 4    | 4    | 5    | 5    | 6    | 7    |
| Pike          | 0     | 0   | 0   | 0   | 0   | 0   | 0   | 0    | 0    | 0    | 0    | 1    | 2    | 2    | 2    |
| Rockdale      | 0     | 0   | 1   | 1   | 2   | 2   | 5   | 8    | 10   | 13   | 16   | 17   | 18   | 29   | 45   |
| Spalding      | 0     | 0   | 0   | 2   | 2   | 2   | 4   | 5    | 10   | 11   | 11   | 11   | 12   | 14   | 15   |
| Walton        | 0     | 0   | 0   | 0   | 0   | 0   | 0   | 1    | 1    | 1    | 1    | 2    | 4    | 5    | 9    |



**Table S8.** Cumulative number of reported COVID-19 cases in the state of Georgia, Dougherty County and Metro Atlanta counties, April 1—18, 2020.

| Location      | April |      |      |      |      |      |      |       |       |       |       |       |       |       |       |       |       |       |
|---------------|-------|------|------|------|------|------|------|-------|-------|-------|-------|-------|-------|-------|-------|-------|-------|-------|
|               | 1     | 2    | 3    | 4    | 5    | 6    | 7    | 8     | 9     | 10    | 11    | 12    | 13    | 14    | 15    | 16    | 17    | 18    |
| Georgia       | 4748  | 5444 | 5967 | 6383 | 6742 | 7558 | 9156 | 10204 | 10885 | 11859 | 12261 | 12452 | 13621 | 13913 | 14583 | 15644 | 16658 | 17841 |
| Dougherty     | 490   | 521  | 607  | 685  | 688  | 722  | 973  | 1001  | 1042  | 1072  | 1102  | 1178  | 1245  | 1297  | 1320  | 1358  | 1385  | 1409  |
| Metro Atlanta | 2609  | 2979 | 3535 | 3890 | 3974 | 4404 | 4980 | 5294  | 5596  | 5976  | 6143  | 6384  | 7026  | 7700  | 8183  | 8610  | 9252  | 9443  |
| Bartow        | 147   | 153  | 159  | 160  | 160  | 182  | 191  | 195   | 203   | 208   | 211   | 213   | 223   | 230   | 237   | 240   | 245   | 246   |
| Butts         | 8     | 9    | 9    | 10   | 12   | 17   | 18   | 23    | 25    | 27    | 28    | 29    | 30    | 35    | 36    | 38    | 40    | 41    |
| Carroll       | 133   | 139  | 147  | 158  | 158  | 163  | 183  | 184   | 195   | 200   | 204   | 210   | 229   | 235   | 242   | 258   | 261   | 271   |
| Cherokee      | 85    | 94   | 114  | 120  | 124  | 141  | 147  | 155   | 167   | 177   | 186   | 187   | 204   | 219   | 232   | 245   | 274   | 285   |
| Clayton       | 128   | 165  | 206  | 235  | 238  | 254  | 278  | 289   | 298   | 328   | 339   | 372   | 396   | 435   | 462   | 473   | 499   | 505   |
| Cobb          | 304   | 341  | 422  | 453  | 474  | 517  | 566  | 608   | 653   | 681   | 705   | 728   | 816   | 895   | 950   | 1014  | 1085  | 1104  |
| Coweta        | 42    | 48   | 56   | 64   | 67   | 76   | 80   | 82    | 87    | 100   | 101   | 106   | 121   | 135   | 138   | 142   | 153   | 160   |
| Dawson        | 11    | 11   | 13   | 16   | 16   | 18   | 20   | 23    | 24    | 25    | 25    | 26    | 32    | 36    | 37    | 39    | 42    | 43    |
| DeKalb        | 360   | 409  | 483  | 539  | 549  | 600  | 673  | 732   | 766   | 826   | 848   | 893   | 1006  | 1144  | 1225  | 1260  | 1366  | 1408  |
| Douglas       | 56    | 66   | 78   | 84   | 91   | 105  | 117  | 124   | 134   | 148   | 151   | 159   | 177   | 189   | 201   | 209   | 222   | 229   |
| Fayette       | 48    | 55   | 61   | 66   | 67   | 74   | 81   | 90    | 93    | 93    | 99    | 100   | 106   | 115   | 122   | 126   | 134   | 136   |
| Forsyth       | 50    | 53   | 61   | 71   | 73   | 85   | 99   | 99    | 109   | 119   | 128   | 133   | 143   | 153   | 157   | 169   | 185   | 197   |
| Fulton        | 638   | 747  | 910  | 959  | 970  | 1053 | 1185 | 1261  | 1336  | 1417  | 1446  | 1495  | 1635  | 1812  | 1902  | 1945  | 2037  | 2065  |
| Gwinnett      | 257   | 303  | 353  | 400  | 410  | 455  | 540  | 586   | 618   | 669   | 681   | 701   | 766   | 815   | 885   | 917   | 1037  | 1059  |
| Hall          | 71    | 72   | 81   | 117  | 117  | 138  | 215  | 233   | 247   | 273   | 276   | 282   | 319   | 363   | 402   | 526   | 605   | 607   |
| Haralson      | 6     | 6    | 10   | 10   | 10   | 14   | 14   | 15    | 15    | 15    | 16    | 16    | 18    | 19    | 19    | 19    | 20    | 20    |
| Heard         | 2     | 2    | 2    | 2    | 2    | 2    | 3    | 3     | 3     | 3     | 4     | 4     | 4     | 5     | 5     | 5     | 5     | 7     |
| Henry         | 95    | 115  | 143  | 167  | 168  | 181  | 208  | 219   | 233   | 249   | 254   | 263   | 289   | 306   | 328   | 330   | 350   | 355   |
| Jasper        | 2     | 2    | 2    | 4    | 4    | 4    | 6    | 6     | 6     | 6     | 6     | 8     | 9     | 9     | 10    | 10    | 14    | 15    |
| Lamar         | 4     | 6    | 6    | 7    | 7    | 15   | 15   | 15    | 15    | 15    | 15    | 17    | 18    | 20    | 21    | 21    | 22    | 24    |
| Meriwether    | 7     | 9    | 10   | 11   | 11   | 15   | 18   | 18    | 18    | 19    | 23    | 23    | 23    | 24    | 28    | 35    | 40    | 40    |
| Morgan        | 2     | 2    | 2    | 2    | 2    | 6    | 10   | 12    | 13    | 14    | 14    | 14    | 15    | 15    | 17    | 19    | 19    | 20    |
| Newton        | 34    | 37   | 42   | 52   | 55   | 65   | 67   | 67    | 70    | 77    | 78    | 82    | 93    | 100   | 113   | 115   | 121   | 121   |
| Paulding      | 33    | 35   | 46   | 50   | 51   | 57   | 62   | 66    | 69    | 74    | 79    | 84    | 100   | 115   | 118   | 123   | 132   | 133   |
| Pickens       | 7     | 9    | 9    | 9    | 9    | 9    | 10   | 10    | 10    | 10    | 11    | 11    | 11    | 13    | 14    | 15    | 16    | 18    |
| Pike          | 2     | 2    | 4    | 5    | 5    | 9    | 10   | 11    | 12    | 15    | 16    | 16    | 19    | 22    | 25    | 28    | 29    | 30    |
| Rockdale      | 47    | 57   | 67   | 75   | 77   | 82   | 85   | 85    | 85    | 89    | 92    | 97    | 101   | 106   | 107   | 111   | 117   | 119   |
| Spalding      | 17    | 17   | 23   | 26   | 26   | 44   | 54   | 56    | 60    | 65    | 69    | 73    | 78    | 83    | 96    | 122   | 124   | 126   |
| Walton        | 13    | 15   | 16   | 18   | 21   | 23   | 25   | 27    | 32    | 34    | 38    | 42    | 45    | 52    | 54    | 56    | 58    | 59    |

**Table S9.** Cumulative number of reported COVID-19 cases in the state of Georgia, Dougherty County and Metro Atlanta counties, April 19—30, 2020.

| Location      | April |       |       |       |       |       |       |       |       |       |       |       |
|---------------|-------|-------|-------|-------|-------|-------|-------|-------|-------|-------|-------|-------|
|               | 19    | 20    | 21    | 22    | 23    | 24    | 25    | 26    | 27    | 28    | 29    | 30    |
| Georgia       | 17619 | 18447 | 19189 | 20099 | 20905 | 21575 | 22225 | 22459 | 23229 | 23607 | 24300 | 25431 |
| Dougherty     | 1425  | 1436  | 1456  | 1456  | 1456  | 1465  | 1470  | 1470  | 1480  | 1493  | 1500  | 1506  |
| Metro Atlanta | 9827  | 10297 | 10543 | 10975 | 11643 | 11965 | 12314 | 12435 | 12904 | 13464 | 13937 | 14305 |
| Bartow        | 250   | 255   | 256   | 259   | 264   | 273   | 283   | 286   | 289   | 306   | 309   | 315   |
| Butts         | 50    | 80    | 81    | 125   | 125   | 125   | 125   | 126   | 126   | 130   | 134   | 145   |
| Carroll       | 282   | 305   | 313   | 313   | 314   | 320   | 325   | 326   | 329   | 342   | 348   | 358   |
| Cherokee      | 300   | 317   | 324   | 340   | 365   | 367   | 368   | 374   | 393   | 436   | 457   | 467   |
| Clayton       | 520   | 540   | 547   | 549   | 616   | 629   | 641   | 641   | 649   | 672   | 693   | 716   |
| Cobb          | 1148  | 1196  | 1230  | 1272  | 1326  | 1368  | 1395  | 1428  | 1483  | 1539  | 1581  | 1621  |
| Coweta        | 164   | 169   | 169   | 169   | 177   | 187   | 187   | 188   | 190   | 191   | 195   | 195   |
| Dawson        | 44    | 45    | 45    | 49    | 50    | 51    | 51    | 51    | 53    | 58    | 60    | 61    |
| DeKalb        | 1473  | 1520  | 1563  | 1609  | 1689  | 1721  | 1788  | 1800  | 1855  | 1907  | 1980  | 2027  |
| Douglas       | 233   | 243   | 246   | 259   | 273   | 276   | 276   | 278   | 284   | 300   | 311   | 319   |
| Fayette       | 139   | 143   | 144   | 146   | 156   | 158   | 161   | 161   | 169   | 171   | 176   | 176   |
| Forsyth       | 202   | 211   | 216   | 227   | 235   | 241   | 249   | 252   | 271   | 284   | 292   | 299   |
| Fulton        | 2131  | 2198  | 2206  | 2255  | 2436  | 2500  | 2543  | 2545  | 2680  | 2753  | 2785  | 2821  |
| Gwinnett      | 1124  | 1181  | 1238  | 1273  | 1351  | 1382  | 1460  | 1504  | 1545  | 1620  | 1744  | 1793  |
| Hall          | 625   | 702   | 756   | 907   | 963   | 1022  | 1032  | 1033  | 1098  | 1185  | 1261  | 1346  |
| Haralson      | 20    | 22    | 25    | 25    | 26    | 26    | 26    | 26    | 27    | 28    | 28    | 28    |
| Heard         | 7     | 7     | 8     | 8     | 9     | 9     | 9     | 9     | 10    | 10    | 10    | 10    |
| Henry         | 371   | 382   | 384   | 386   | 413   | 419   | 436   | 451   | 464   | 488   | 492   | 492   |
| Jasper        | 17    | 17    | 18    | 18    | 19    | 20    | 20    | 20    | 20    | 22    | 22    | 22    |
| Lamar         | 25    | 27    | 29    | 29    | 31    | 31    | 33    | 33    | 34    | 35    | 37    | 38    |
| Meriwether    | 42    | 46    | 47    | 48    | 49    | 49    | 49    | 49    | 49    | 53    | 54    | 54    |
| Morgan        | 22    | 22    | 23    | 23    | 25    | 25    | 25    | 25    | 25    | 25    | 27    | 27    |
| Newton        | 130   | 139   | 142   | 146   | 153   | 158   | 166   | 166   | 173   | 184   | 193   | 196   |
| Paulding      | 137   | 141   | 141   | 145   | 148   | 156   | 159   | 160   | 166   | 172   | 176   | 189   |
| Pickens       | 18    | 18    | 18    | 18    | 19    | 20    | 20    | 21    | 21    | 26    | 26    | 26    |
| Pike          | 33    | 33    | 34    | 35    | 38    | 38    | 39    | 39    | 39    | 39    | 39    | 40    |
| Rockdale      | 131   | 140   | 141   | 144   | 151   | 158   | 161   | 161   | 166   | 175   | 178   | 189   |
| Spalding      | 128   | 135   | 136   | 136   | 140   | 144   | 189   | 190   | 197   | 201   | 205   | 210   |
| Walton        | 61    | 63    | 63    | 73    | 81    | 92    | 97    | 97    | 100   | 113   | 121   | 126   |

**Table S10.** Cumulative number of COVID-19 cases reported in the state of Georgia, Dougherty County and Metro Atlanta counties, May 1—15, 2020.

| Location      | May   |       |       |       |       |       |       |       |       |       |       |       |       |       |       |
|---------------|-------|-------|-------|-------|-------|-------|-------|-------|-------|-------|-------|-------|-------|-------|-------|
|               | 1     | 2     | 3     | 4     | 5     | 6     | 7     | 8     | 9     | 10    | 11    | 12    | 13    | 14    | 15    |
| Georgia       | 26436 | 27268 | 27618 | 28350 | 28876 | 29724 | 30524 | 31089 | 31481 | 32267 | 32448 | 33311 | 33866 | 34422 | 35242 |
| Dougherty     | 1531  | 1534  | 1536  | 1543  | 1550  | 1555  | 1566  | 1583  | 1587  | 1593  | 1609  | 1643  | 1644  | 1643  | 1662  |
| Metro Atlanta | 14771 | 15399 | 15638 | 16108 | 16497 | 17119 | 17382 | 17731 | 18089 | 18502 | 18668 | 18948 | 19155 | 19426 | 19749 |
| Bartow        | 323   | 324   | 325   | 341   | 351   | 359   | 359   | 361   | 361   | 363   | 364   | 368   | 377   | 382   | 385   |
| Butts         | 151   | 151   | 150   | 152   | 158   | 163   | 167   | 171   | 172   | 180   | 189   | 191   | 192   | 196   | 196   |
| Carroll       | 375   | 383   | 386   | 382   | 387   | 391   | 389   | 390   | 393   | 395   | 395   | 398   | 397   | 400   | 408   |
| Cherokee      | 474   | 482   | 491   | 509   | 519   | 544   | 569   | 578   | 593   | 609   | 621   | 635   | 655   | 676   | 695   |
| Clayton       | 733   | 777   | 793   | 804   | 813   | 849   | 878   | 888   | 901   | 921   | 944   | 951   | 955   | 983   | 999   |
| Cobb          | 1679  | 1749  | 1768  | 1839  | 1887  | 1998  | 2024  | 2072  | 2128  | 2175  | 2186  | 2253  | 2280  | 2363  | 2395  |
| Coweta        | 211   | 213   | 230   | 242   | 244   | 246   | 257   | 257   | 265   | 276   | 278   | 280   | 280   | 280   | 282   |
| Dawson        | 61    | 66    | 66    | 67    | 67    | 72    | 73    | 75    | 75    | 81    | 81    | 76    | 81    | 84    | 84    |
| DeKalb        | 2073  | 2148  | 2184  | 2255  | 2284  | 2357  | 2396  | 2445  | 2489  | 2536  | 2555  | 2605  | 2632  | 2664  | 2751  |
| Douglas       | 329   | 335   | 341   | 343   | 353   | 363   | 366   | 398   | 400   | 414   | 417   | 417   | 422   | 429   | 433   |
| Fayette       | 178   | 181   | 183   | 187   | 189   | 188   | 191   | 190   | 195   | 199   | 201   | 202   | 202   | 204   | 205   |
| Forsyth       | 309   | 331   | 332   | 341   | 347   | 356   | 361   | 364   | 366   | 388   | 391   | 386   | 393   | 395   | 397   |
| Fulton        | 2880  | 2928  | 2981  | 3057  | 3165  | 3250  | 3260  | 3317  | 3385  | 3509  | 3516  | 3595  | 3614  | 3625  | 3703  |
| Gwinnett      | 1848  | 1934  | 1980  | 2057  | 2102  | 2222  | 2254  | 2322  | 2403  | 2447  | 2475  | 2495  | 2510  | 2552  | 2597  |
| Hall          | 1482  | 1694  | 1700  | 1776  | 1846  | 1914  | 1956  | 1997  | 2002  | 2012  | 2039  | 2060  | 2112  | 2125  | 2140  |
| Haralson      | 29    | 29    | 29    | 29    | 30    | 31    | 32    | 32    | 32    | 32    | 32    | 33    | 34    | 34    | 34    |
| Heard         | 11    | 11    | 14    | 13    | 14    | 14    | 14    | 14    | 14    | 14    | 15    | 17    | 17    | 17    | 17    |
| Henry         | 492   | 512   | 520   | 520   | 527   | 546   | 558   | 566   | 593   | 604   | 610   | 614   | 615   | 621   | 628   |
| Jasper        | 22    | 23    | 24    | 25    | 25    | 26    | 26    | 26    | 25    | 25    | 25    | 26    | 26    | 26    | 26    |
| Lamar         | 39    | 40    | 40    | 39    | 39    | 39    | 38    | 39    | 39    | 40    | 40    | 40    | 40    | 41    | 41    |
| Meriwether    | 54    | 54    | 54    | 56    | 57    | 59    | 61    | 62    | 65    | 65    | 66    | 66    | 68    | 72    | 73    |
| Morgan        | 27    | 27    | 28    | 29    | 30    | 30    | 30    | 30    | 32    | 33    | 33    | 33    | 33    | 33    | 33    |
| Newton        | 200   | 205   | 208   | 215   | 222   | 232   | 236   | 240   | 252   | 258   | 260   | 261   | 262   | 263   | 262   |
| Paulding      | 190   | 194   | 195   | 207   | 209   | 212   | 218   | 221   | 222   | 223   | 226   | 230   | 234   | 236   | 240   |
| Pickens       | 26    | 27    | 29    | 29    | 28    | 29    | 31    | 32    | 33    | 33    | 33    | 35    | 36    | 35    | 35    |
| Pike          | 40    | 40    | 40    | 40    | 40    | 40    | 41    | 41    | 41    | 44    | 44    | 47    | 45    | 44    | 44    |
| Rockdale      | 191   | 194   | 195   | 199   | 204   | 223   | 226   | 228   | 230   | 239   | 243   | 245   | 248   | 249   | 249   |
| Spalding      | 214   | 215   | 219   | 219   | 222   | 223   | 224   | 227   | 232   | 235   | 237   | 237   | 236   | 239   | 239   |
| Walton        | 129   | 132   | 133   | 136   | 138   | 143   | 147   | 148   | 151   | 152   | 152   | 152   | 159   | 158   | 158   |

**Table S11.** Cumulative number of COVID-19 cases reported in the state of Georgia, Dougherty County and Metro Atlanta counties, May 16—31, 2020.

| Location      | May   |       |       |       |       |       |       |       |       |       |       |       |       |       |       |       |
|---------------|-------|-------|-------|-------|-------|-------|-------|-------|-------|-------|-------|-------|-------|-------|-------|-------|
|               | 16    | 17    | 18    | 19    | 20    | 21    | 22    | 23    | 24    | 25    | 26    | 27    | 28    | 29    | 30    | 31    |
| Georgia       | 35655 | 35954 | 36634 | 37214 | 38162 | 38969 | 39734 | 40408 | 40989 | 41414 | 42066 | 42713 | 43363 | 43888 | 44336 | 45051 |
| Dougherty     | 1662  | 1661  | 1664  | 1668  | 1672  | 1716  | 1723  | 1725  | 1727  | 1730  | 1774  | 1784  | 1764  | 1763  | 1770  | 1770  |
| Metro Atlanta | 19884 | 19899 | 20130 | 20502 | 20873 | 21239 | 21602 | 21878 | 22278 | 22799 | 23495 | 24170 | 24583 | 25099 | 25218 | 25308 |
| Bartow        | 385   | 384   | 396   | 410   | 419   | 424   | 427   | 444   | 443   | 443   | 452   | 458   | 469   | 477   | 478   | 478   |
| Butts         | 197   | 197   | 199   | 199   | 205   | 205   | 206   | 208   | 209   | 211   | 214   | 219   | 223   | 229   | 229   | 228   |
| Carroll       | 409   | 406   | 408   | 418   | 425   | 437   | 439   | 440   | 445   | 472   | 490   | 512   | 516   | 517   | 518   | 525   |
| Cherokee      | 700   | 714   | 723   | 745   | 758   | 769   | 790   | 807   | 810   | 831   | 850   | 861   | 869   | 885   | 890   | 909   |
| Clayton       | 1002  | 1005  | 1009  | 1010  | 1034  | 1047  | 1071  | 1089  | 1119  | 1132  | 1173  | 1189  | 1204  | 1217  | 1217  | 1221  |
| Cobb          | 2407  | 2406  | 2429  | 2503  | 2584  | 2625  | 2655  | 2661  | 2702  | 2795  | 2854  | 2907  | 2948  | 2987  | 3009  | 3027  |
| Coweta        | 285   | 284   | 285   | 287   | 286   | 303   | 311   | 316   | 331   | 376   | 383   | 397   | 403   | 414   | 415   | 417   |
| Dawson        | 84    | 83    | 84    | 86    | 95    | 99    | 101   | 101   | 101   | 103   | 104   | 108   | 108   | 109   | 109   | 109   |
| DeKalb        | 2800  | 2802  | 2856  | 2918  | 2979  | 3038  | 3080  | 3146  | 3257  | 3305  | 3421  | 3573  | 3635  | 3718  | 3731  | 3734  |
| Douglas       | 438   | 437   | 439   | 445   | 452   | 455   | 478   | 487   | 490   | 504   | 517   | 521   | 528   | 539   | 539   | 543   |
| Fayette       | 206   | 207   | 210   | 212   | 215   | 212   | 215   | 219   | 220   | 221   | 232   | 235   | 231   | 234   | 235   | 235   |
| Forsyth       | 398   | 399   | 405   | 412   | 434   | 443   | 444   | 446   | 449   | 480   | 492   | 502   | 507   | 512   | 512   | 512   |
| Fulton        | 3749  | 3759  | 3751  | 3795  | 3793  | 3872  | 3931  | 3977  | 4054  | 4080  | 4230  | 4309  | 4367  | 4490  | 4507  | 4524  |
| Gwinnett      | 2597  | 2594  | 2680  | 2771  | 2820  | 2882  | 2961  | 2997  | 3056  | 3198  | 3307  | 3480  | 3619  | 3733  | 3769  | 3780  |
| Hall          | 2146  | 2150  | 2164  | 2191  | 2230  | 2248  | 2269  | 2305  | 2322  | 2327  | 2378  | 2422  | 2450  | 2465  | 2467  | 2467  |
| Haralson      | 34    | 34    | 34    | 35    | 35    | 36    | 36    | 36    | 36    | 36    | 40    | 40    | 42    | 43    | 43    | 43    |
| Heard         | 17    | 17    | 17    | 20    | 23    | 24    | 26    | 26    | 26    | 28    | 28    | 30    | 32    | 32    | 33    | 34    |
| Henry         | 630   | 627   | 627   | 611   | 615   | 623   | 627   | 626   | 632   | 641   | 655   | 672   | 672   | 686   | 688   | 690   |
| Jasper        | 26    | 26    | 26    | 26    | 26    | 26    | 31    | 31    | 31    | 31    | 32    | 32    | 32    | 33    | 36    | 36    |
| Lamar         | 41    | 41    | 41    | 44    | 44    | 46    | 50    | 50    | 51    | 53    | 57    | 60    | 66    | 67    | 67    | 67    |
| Meriwether    | 72    | 72    | 70    | 70    | 73    | 76    | 78    | 78    | 78    | 78    | 78    | 81    | 82    | 84    | 85    | 85    |
| Morgan        | 33    | 33    | 34    | 34    | 34    | 34    | 35    | 36    | 36    | 37    | 37    | 37    | 37    | 37    | 37    | 37    |
| Newton        | 261   | 257   | 264   | 266   | 275   | 280   | 286   | 289   | 304   | 311   | 335   | 341   | 344   | 351   | 352   | 352   |
| Paulding      | 242   | 240   | 241   | 247   | 261   | 264   | 273   | 275   | 277   | 291   | 294   | 305   | 309   | 320   | 326   | 328   |
| Pickens       | 35    | 35    | 38    | 39    | 39    | 40    | 41    | 43    | 43    | 43    | 43    | 43    | 45    | 47    | 47    | 48    |
| Pike          | 44    | 44    | 44    | 44    | 45    | 45    | 48    | 48    | 49    | 50    | 52    | 54    | 54    | 54    | 54    | 54    |
| Rockdale      | 249   | 249   | 250   | 252   | 251   | 254   | 257   | 258   | 265   | 267   | 268   | 276   | 278   | 283   | 285   | 285   |
| Spalding      | 239   | 239   | 242   | 246   | 251   | 246   | 250   | 253   | 253   | 259   | 262   | 264   | 267   | 275   | 275   | 275   |
| Walton        | 158   | 158   | 164   | 166   | 172   | 186   | 186   | 186   | 189   | 196   | 217   | 242   | 246   | 261   | 265   | 265   |

**Table S12.** Cumulative number of COVID-19 cases reported in the state of Georgia, Dougherty County and Metro Atlanta counties, June 1—14, 2020.

| Location      | June  |       |       |       |       |       |       |       |       |       |       |       |       |       |
|---------------|-------|-------|-------|-------|-------|-------|-------|-------|-------|-------|-------|-------|-------|-------|
|               | 1     | 2     | 3     | 4     | 5     | 6     | 7     | 8     | 9     | 10    | 11    | 12    | 13    | 14    |
| Georgia       | 45757 | 46063 | 46711 | 47528 | 48280 | 48943 | 49371 | 49995 | 50769 | 51465 | 52332 | 53201 | 54178 | 54874 |
| Dougherty     | 1780  | 1784  | 1790  | 1794  | 1796  | 1803  | 1803  | 1806  | 1818  | 1820  | 1827  | 1828  | 1833  | 1837  |
| Metro Atlanta | 25683 | 25786 | 26295 | 26872 | 27334 | 27567 | 27600 | 28039 | 28433 | 28838 | 29348 | 29740 | 29977 | 30092 |
| Bartow        | 481   | 485   | 496   | 504   | 514   | 521   | 522   | 523   | 527   | 530   | 532   | 539   | 542   | 543   |
| Butts         | 228   | 234   | 237   | 240   | 242   | 243   | 244   | 244   | 253   | 254   | 255   | 242   | 243   | 245   |
| Carroll       | 526   | 524   | 535   | 568   | 578   | 580   | 580   | 585   | 587   | 591   | 593   | 602   | 611   | 614   |
| Cherokee      | 910   | 911   | 923   | 934   | 944   | 958   | 959   | 975   | 978   | 990   | 1000  | 1014  | 1017  | 1029  |
| Clayton       | 1234  | 1238  | 1260  | 1282  | 1310  | 1323  | 1328  | 1343  | 1362  | 1378  | 1399  | 1413  | 1427  | 1431  |
| Cobb          | 3052  | 3056  | 3097  | 3165  | 3223  | 3242  | 3249  | 3298  | 3337  | 3370  | 3471  | 3522  | 3557  | 3581  |
| Coweta        | 421   | 422   | 432   | 440   | 458   | 463   | 463   | 468   | 474   | 476   | 488   | 507   | 509   | 511   |
| Dawson        | 109   | 109   | 110   | 110   | 112   | 113   | 113   | 114   | 114   | 116   | 118   | 118   | 118   | 118   |
| DeKalb        | 3795  | 3803  | 3874  | 3939  | 3986  | 4008  | 4012  | 4054  | 4120  | 4186  | 4229  | 4282  | 4303  | 4311  |
| Douglas       | 546   | 549   | 556   | 571   | 583   | 592   | 592   | 601   | 612   | 624   | 634   | 641   | 651   | 655   |
| Fayette       | 235   | 237   | 239   | 241   | 244   | 245   | 245   | 247   | 254   | 254   | 258   | 259   | 260   | 261   |
| Forsyth       | 523   | 532   | 534   | 535   | 541   | 546   | 546   | 556   | 575   | 579   | 579   | 589   | 594   | 595   |
| Fulton        | 4621  | 4638  | 4688  | 4724  | 4790  | 4822  | 4823  | 4887  | 4925  | 4989  | 5031  | 5069  | 5100  | 5106  |
| Gwinnett      | 3870  | 3891  | 4063  | 4267  | 4372  | 4433  | 4440  | 4598  | 4692  | 4808  | 4980  | 5089  | 5141  | 5172  |
| Hall          | 2507  | 2508  | 2539  | 2566  | 2596  | 2615  | 2616  | 2642  | 2664  | 2686  | 2699  | 2727  | 2740  | 2747  |
| Haralson      | 45    | 47    | 49    | 50    | 51    | 52    | 52    | 52    | 54    | 56    | 56    | 57    | 57    | 57    |
| Heard         | 34    | 35    | 35    | 37    | 36    | 36    | 36    | 36    | 37    | 39    | 41    | 42    | 42    | 43    |
| Henry         | 693   | 695   | 716   | 742   | 751   | 756   | 756   | 767   | 779   | 787   | 810   | 829   | 839   | 841   |
| Jasper        | 40    | 39    | 40    | 45    | 46    | 47    | 48    | 49    | 51    | 51    | 55    | 56    | 56    | 56    |
| Lamar         | 71    | 71    | 73    | 75    | 76    | 76    | 76    | 76    | 76    | 78    | 79    | 79    | 79    | 79    |
| Meriwether    | 86    | 87    | 95    | 99    | 105   | 106   | 106   | 109   | 110   | 114   | 119   | 123   | 125   | 125   |
| Morgan        | 38    | 38    | 38    | 38    | 39    | 39    | 39    | 39    | 40    | 40    | 40    | 40    | 40    | 40    |
| Newton        | 361   | 370   | 376   | 382   | 388   | 389   | 389   | 395   | 396   | 402   | 407   | 412   | 415   | 415   |
| Paulding      | 328   | 330   | 334   | 340   | 347   | 351   | 352   | 354   | 371   | 382   | 397   | 401   | 402   | 405   |
| Pickens       | 48    | 48    | 50    | 50    | 50    | 51    | 52    | 52    | 53    | 57    | 59    | 59    | 65    | 65    |
| Pike          | 54    | 54    | 56    | 57    | 59    | 60    | 61    | 62    | 64    | 65    | 65    | 66    | 69    | 69    |
| Rockdale      | 285   | 289   | 297   | 302   | 304   | 308   | 308   | 314   | 320   | 325   | 329   | 333   | 338   | 340   |
| Spalding      | 277   | 277   | 280   | 281   | 292   | 294   | 294   | 296   | 301   | 302   | 308   | 309   | 313   | 314   |
| Walton        | 265   | 269   | 273   | 288   | 297   | 298   | 299   | 303   | 307   | 309   | 317   | 321   | 324   | 324   |

## Legends of Supplementary Figures: Results for Counties in Metro Atlanta, GA, USA.

**Figure S1.** Comparison between  $R_t$  for Bartow County, GA, March 2—June 14, 2020, estimated using the instantaneous reproduction number method implemented in EpiEstim package (red: 1-week window and blue: 2-week window) and that using the Generalized Growth Model (GGM) (black). Solid lines represent the median estimates and the dashed line represent the 2.5 and 97.5 quantiles.

**Figure S2.** Comparison between  $R_t$  for Butts County, GA, March 2—June 14, 2020, estimated using the instantaneous reproduction number method implemented in EpiEstim package (red: 1-week window and blue: 2-week window) and that using the Generalized Growth Model (GGM) (black). Solid lines represent the median estimates and the dashed line represent the 2.5 and 97.5 quantiles.

**Figure S3.** Comparison between  $R_t$  for Carroll County, GA, March 2—June 14, 2020, estimated using the instantaneous reproduction number method implemented in EpiEstim package (red: 1-week window and blue: 2-week window) and that using the Generalized Growth Model (GGM) (black). Solid lines represent the median estimates and the dashed line represent the 2.5 and 97.5 quantiles.

**Figure S4.** Comparison between  $R_t$  for Cherokee County, GA, March 2—June 14, 2020, estimated using the instantaneous reproduction number method implemented in EpiEstim package (red: 1-week window and blue: 2-week window) and that using the Generalized Growth Model (GGM) (black). Solid lines represent the median estimates and the dashed line represent the 2.5 and 97.5 quantiles.

**Figure S5.** Comparison between  $R_t$  for Clayton County, GA, March 2—June 14, 2020, estimated using the instantaneous reproduction number method implemented in EpiEstim package (red: 1-week window and blue: 2-week window) and that using the Generalized Growth Model (GGM) (black). Solid lines represent the median estimates and the dashed line represent the 2.5 and 97.5 quantiles.

**Figure S6.** Comparison between  $R_t$  for Cobb County, GA, March 2—June 14, 2020, estimated using the instantaneous reproduction number method implemented in EpiEstim package (red: 1-week window and blue: 2-week window) and that using the Generalized Growth Model (GGM) (black). Solid lines represent the median estimates and the dashed line represent the 2.5 and 97.5 quantiles.

**Figure S7.** Comparison between  $R_t$  for Coweta County, GA, March 2—June 14, 2020, estimated using the instantaneous reproduction number method implemented in EpiEstim package (red: 1-week window and blue: 2-week window) and that using the Generalized Growth Model (GGM) (black). Solid lines represent the median estimates and the dashed line represent the 2.5 and 97.5 quantiles.

**Figure S8.** Comparison between  $R_t$  for Dawson County, GA, March 2—June 14, 2020, estimated using the instantaneous reproduction number method implemented in EpiEstim package (red: 1-week window and blue: 2-week window) and that using the Generalized Growth Model (GGM) (black). Solid lines represent the median estimates and the dashed line represent the 2.5 and 97.5 quantiles.

**Figure S9.** Comparison between  $R_t$  for DeKalb County, GA, March 2—June 14, 2020, estimated using the instantaneous reproduction number method implemented in EpiEstim package (red: 1-week window and blue: 2-week window) and that using the Generalized Growth Model (GGM) (black). Solid lines represent the median estimates and the dashed line represent the 2.5 and 97.5 quantiles.

**Figure S10.** Comparison between  $R_t$  for Douglas County, GA, March 2—June 14, 2020, estimated using the instantaneous reproduction number method implemented in EpiEstim package (red: 1-week window

and blue: 2-week window) and that using the Generalized Growth Model (GGM) (black). Solid lines represent the median estimates and the dashed line represent the 2.5 and 97.5 quantiles.

**Figure S11.** Comparison between  $R_t$  for Fayette County, GA, March 2—June 14, 2020, estimated using the instantaneous reproduction number method implemented in EpiEstim package (red: 1-week window and blue: 2-week window) and that using the Generalized Growth Model (GGM) (black). Solid lines represent the median estimates and the dashed line represent the 2.5 and 97.5 quantiles.

**Figure S12.** Comparison between  $R_t$  for Forsyth County, GA, March 2—June 14, 2020, estimated using the instantaneous reproduction number method implemented in EpiEstim package (red: 1-week window and blue: 2-week window) and that using the Generalized Growth Model (GGM) (black). Solid lines represent the median estimates and the dashed line represent the 2.5 and 97.5 quantiles.

**Figure S13.** Comparison between  $R_t$  for Fulton County, GA, March 2—June 14, 2020, estimated using the instantaneous reproduction number method implemented in EpiEstim package (red: 1-week window and blue: 2-week window) and that using the Generalized Growth Model (GGM) (black). Solid lines represent the median estimates and the dashed line represent the 2.5 and 97.5 quantiles.

**Figure S14.** Comparison between  $R_t$  for Gwinnett County, GA, March 2—June 14, 2020, estimated using the instantaneous reproduction number method implemented in EpiEstim package (red: 1-week window and blue: 2-week window) and that using the Generalized Growth Model (GGM) (black). Solid lines represent the median estimates and the dashed line represent the 2.5 and 97.5 quantiles.

**Figure S15.** Comparison between  $R_t$  for Hall County, GA, March 2—June 14, 2020, estimated using the instantaneous reproduction number method implemented in EpiEstim package (red: 1-week window and blue: 2-week window) and that using the Generalized Growth Model (GGM) (black). Solid lines represent the median estimates and the dashed line represent the 2.5 and 97.5 quantiles.

**Figure S16.** Comparison between  $R_t$  for Haralson County, GA, March 2—June 14, 2020, estimated using the instantaneous reproduction number method implemented in EpiEstim package (red: 1-week window and blue: 2-week window) and that using the Generalized Growth Model (GGM) (black). Solid lines represent the median estimates and the dashed line represent the 2.5 and 97.5 quantiles.

**Figure S17.** Comparison between  $R_t$  for Heard County, GA, March 2—June 14, 2020, estimated using the instantaneous reproduction number method implemented in EpiEstim package (red: 1-week window and blue: 2-week window) and that using the Generalized Growth Model (GGM) (black). Solid lines represent the median estimates and the dashed line represent the 2.5 and 97.5 quantiles.

**Figure S18.** Comparison between  $R_t$  for Henry County, GA, March 2—June 14, 2020, estimated using the instantaneous reproduction number method implemented in EpiEstim package (red: 1-week window and blue: 2-week window) and that using the Generalized Growth Model (GGM) (black). Solid lines represent the median estimates and the dashed line represent the 2.5 and 97.5 quantiles.

**Figure S19.** Comparison between  $R_t$  for Jasper County, GA, March 2—June 14, 2020, estimated using the instantaneous reproduction number method implemented in EpiEstim package (red: 1-week window and blue: 2-week window) and that using the Generalized Growth Model (GGM) (black). Solid lines represent the median estimates and the dashed line represent the 2.5 and 97.5 quantiles.

**Figure S20.** Comparison between  $R_t$  for Lamar County, GA, March 2—June 14, 2020, estimated using the instantaneous reproduction number method implemented in EpiEstim package (red: 1-week window

and blue: 2-week window) and that using the Generalized Growth Model (GGM) (black). Solid lines represent the median estimates and the dashed line represent the 2.5 and 97.5 quantiles.

**Figure S21.** Comparison between  $R_t$  for Meriwether County, GA, March 2—June 14, 2020, estimated using the instantaneous reproduction number method implemented in EpiEstim package (red: 1-week window and blue: 2-week window) and that using the Generalized Growth Model (GGM) (black). Solid lines represent the median estimates and the dashed line represent the 2.5 and 97.5 quantiles.

**Figure S22.** Comparison between  $R_t$  for Morgan County, GA, March 2—June 14, 2020, estimated using the instantaneous reproduction number method implemented in EpiEstim package (red: 1-week window and blue: 2-week window) and that using the Generalized Growth Model (GGM) (black). Solid lines represent the median estimates and the dashed line represent the 2.5 and 97.5 quantiles.

**Figure S23.** Comparison between  $R_t$  for Newton County, GA, March 2—June 14, 2020, estimated using the instantaneous reproduction number method implemented in EpiEstim package (red: 1-week window and blue: 2-week window) and that using the Generalized Growth Model (GGM) (black). Solid lines represent the median estimates and the dashed line represent the 2.5 and 97.5 quantiles.

**Figure S24.** Comparison between  $R_t$  for Paulding County, GA, March 2—June 14, 2020, estimated using the instantaneous reproduction number method implemented in EpiEstim package (red: 1-week window and blue: 2-week window) and that using the Generalized Growth Model (GGM) (black). Solid lines represent the median estimates and the dashed line represent the 2.5 and 97.5 quantiles.

**Figure S25.** Comparison between  $R_t$  for Pickens County, GA, March 2—June 14, 2020, estimated using the instantaneous reproduction number method implemented in EpiEstim package (red: 1-week window and blue: 2-week window) and that using the Generalized Growth Model (GGM) (black). Solid lines represent the median estimates and the dashed line represent the 2.5 and 97.5 quantiles.

**Figure S26.** Comparison between  $R_t$  for Pike County, GA, March 2—June 14, 2020, estimated using the instantaneous reproduction number method implemented in EpiEstim package (red: 1-week window and blue: 2-week window) and that using the Generalized Growth Model (GGM) (black). Solid lines represent the median estimates and the dashed line represent the 2.5 and 97.5 quantiles.

**Figure S27.** Comparison between  $R_t$  for Rockdale County, GA, March 2—June 14, 2020, estimated using the instantaneous reproduction number method implemented in EpiEstim package (red: 1-week window and blue: 2-week window) and that using the Generalized Growth Model (GGM) (black). Solid lines represent the median estimates and the dashed line represent the 2.5 and 97.5 quantiles.

**Figure S28.** Comparison between  $R_t$  for Spalding County, GA, March 2—June 14, 2020, estimated using the instantaneous reproduction number method implemented in EpiEstim package (red: 1-week window and blue: 2-week window) and that using the Generalized Growth Model (GGM) (black). Solid lines represent the median estimates and the dashed line represent the 2.5 and 97.5 quantiles.

**Figure S29.** Comparison between  $R_t$  for Walton County, GA, March 2—June 14, 2020, estimated using the instantaneous reproduction number method implemented in EpiEstim package (red: 1-week window and blue: 2-week window) and that using the Generalized Growth Model (GGM) (black). Solid lines represent the median estimates and the dashed line represent the 2.5 and 97.5 quantiles.



# Bartow

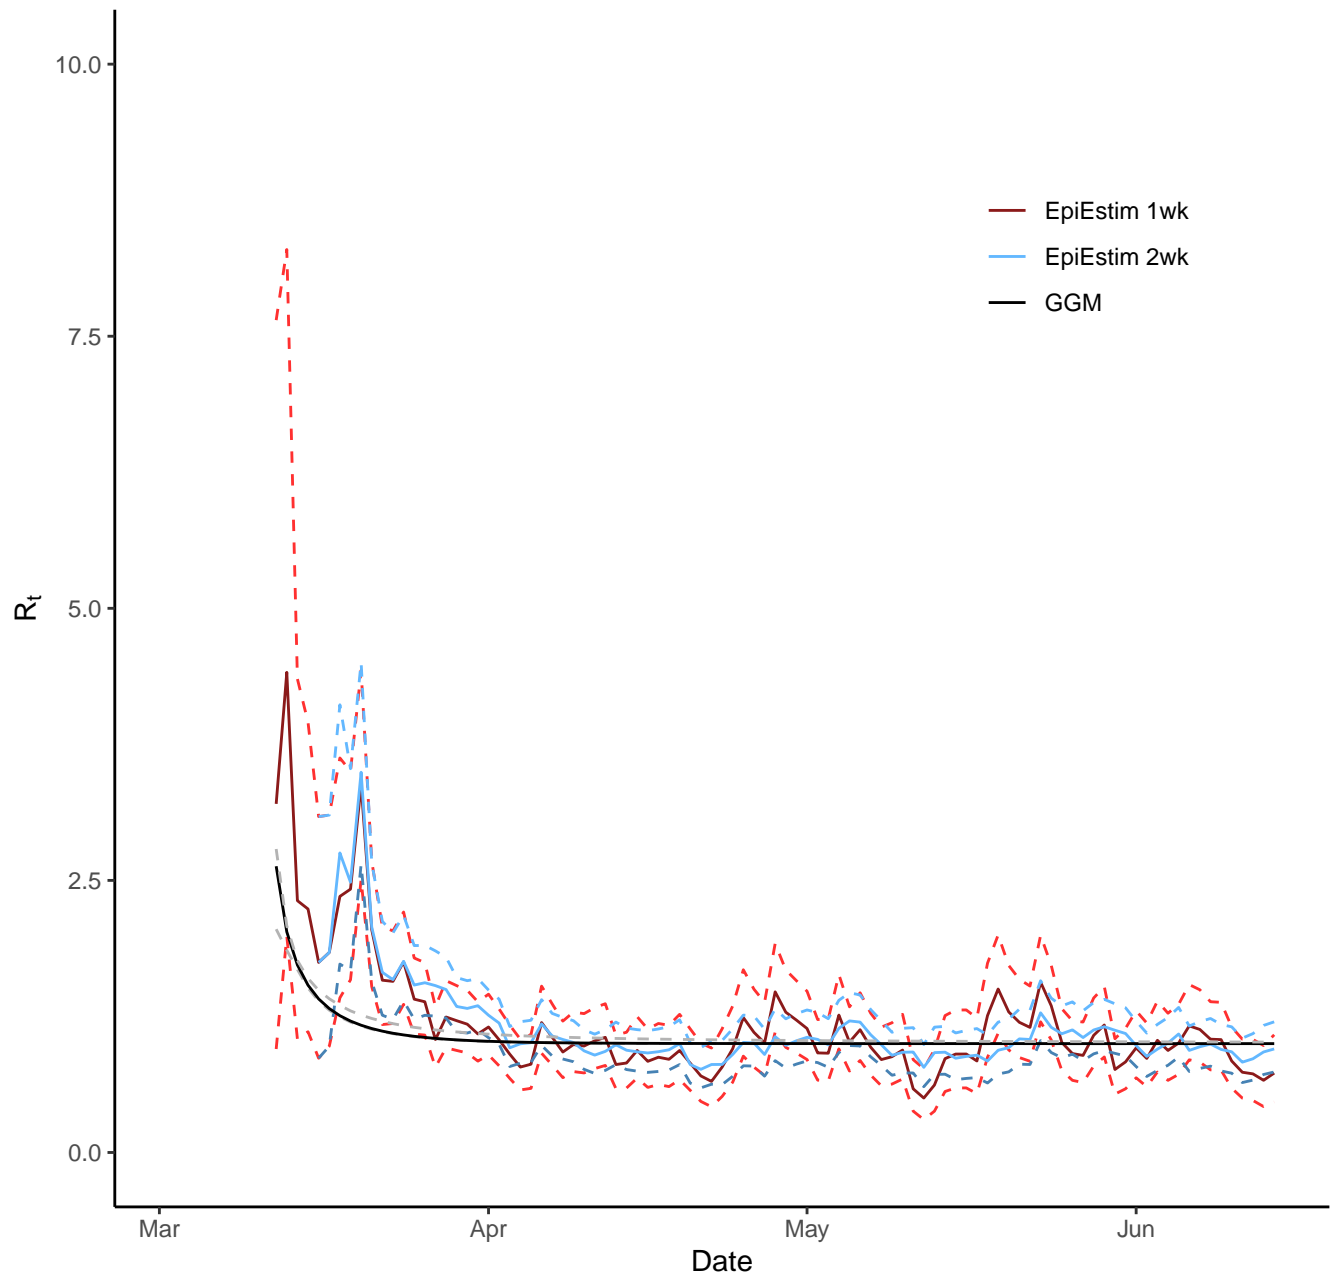

# Butts

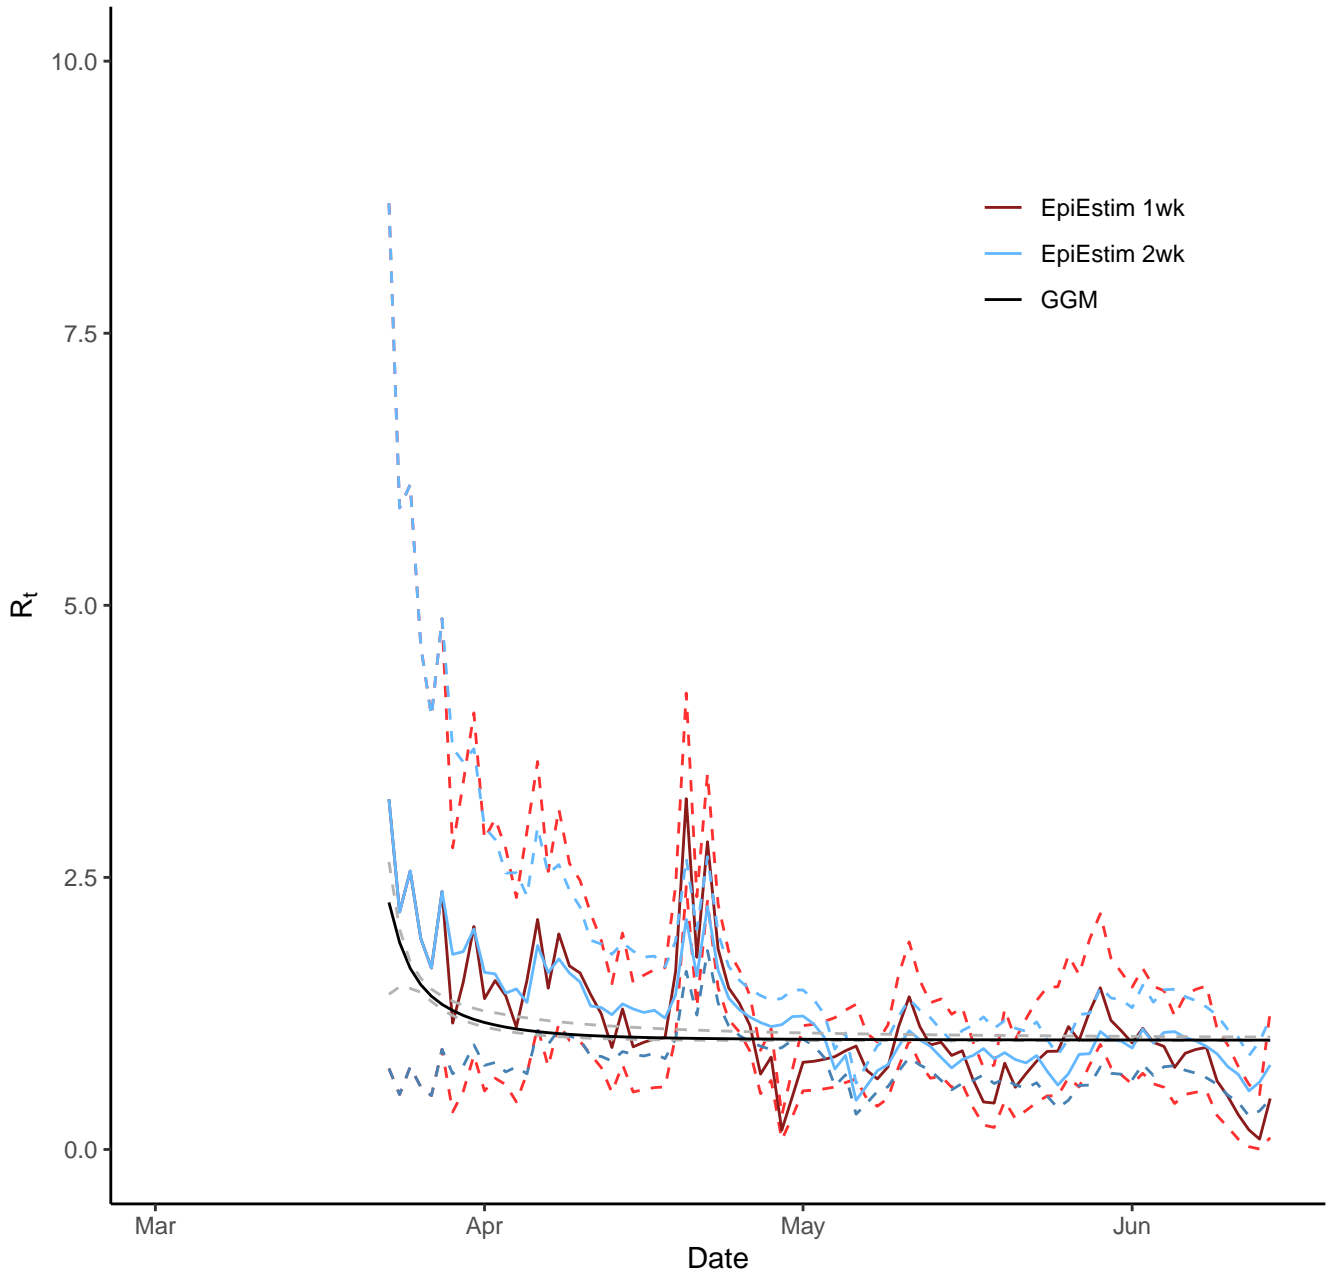

# Carroll

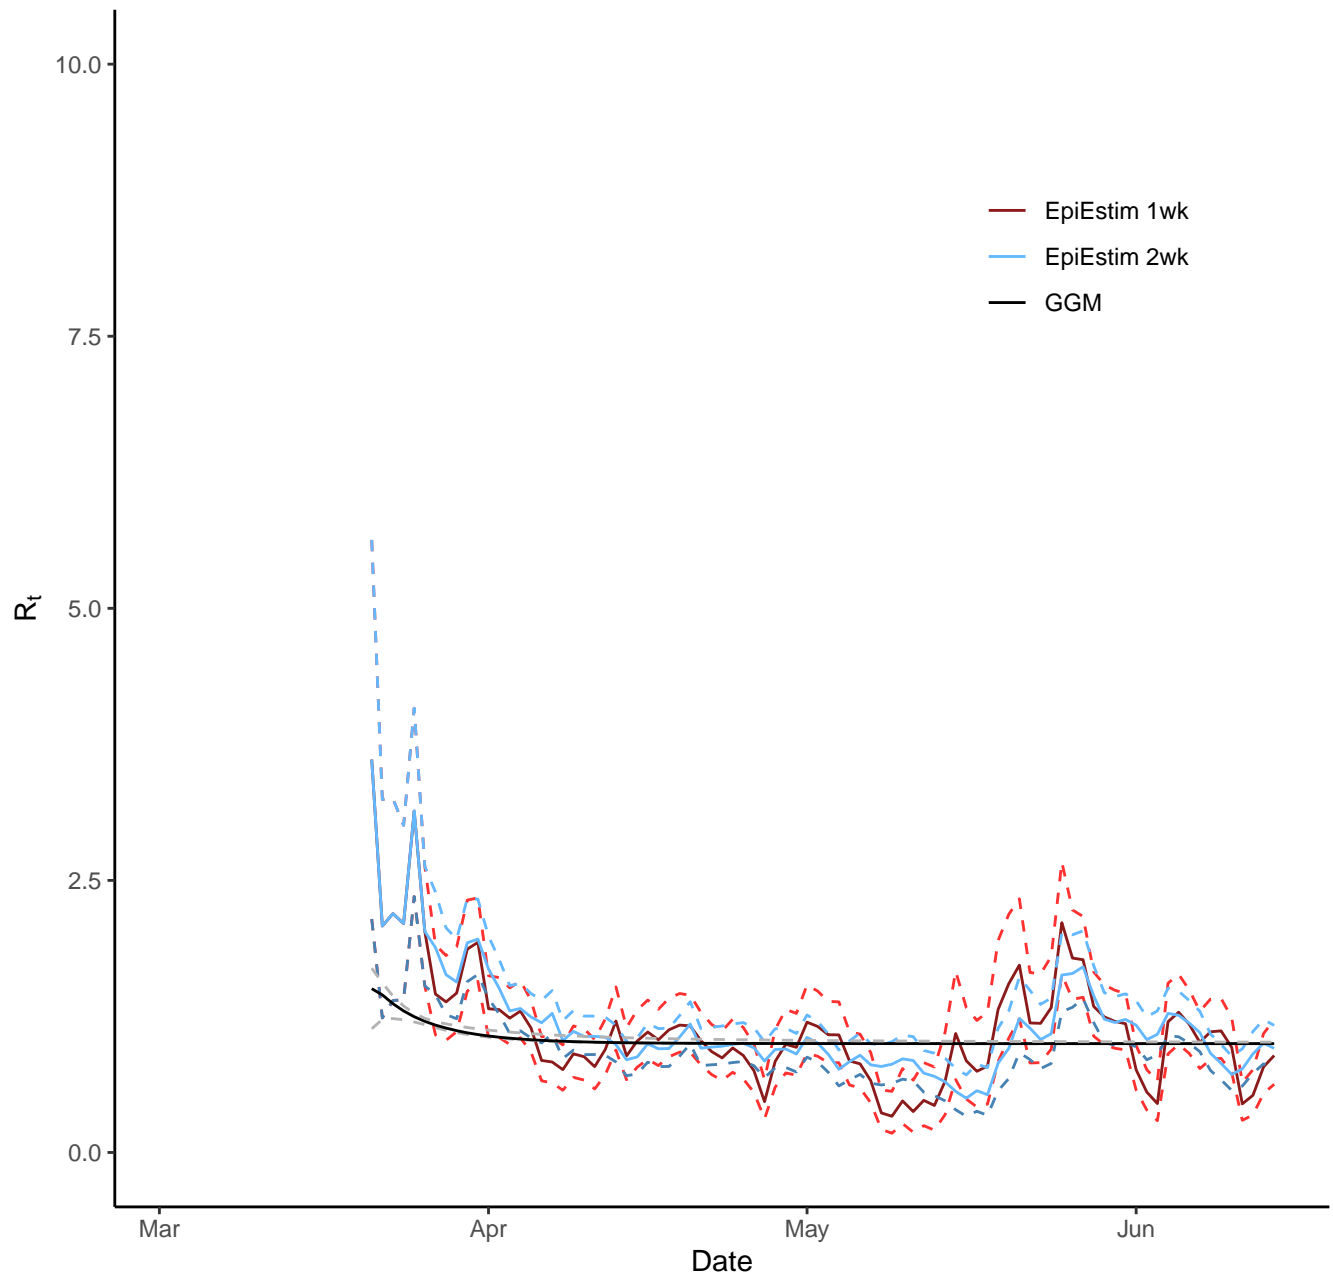

# Cherokee

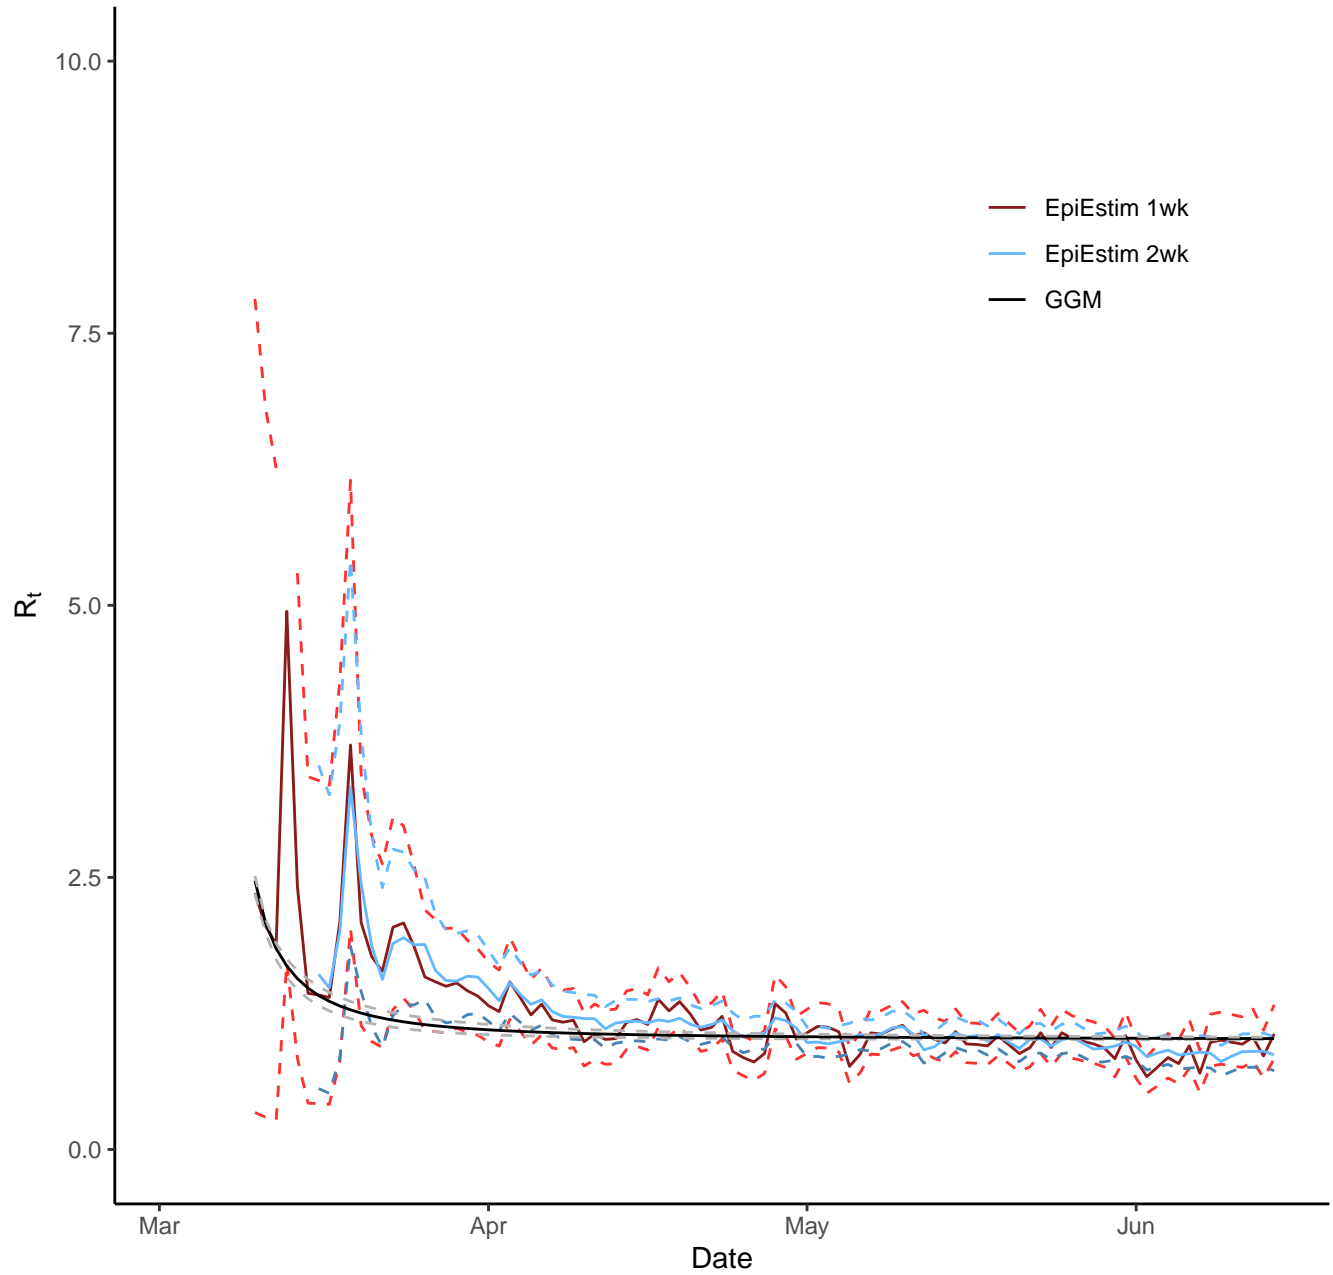

# Clayton

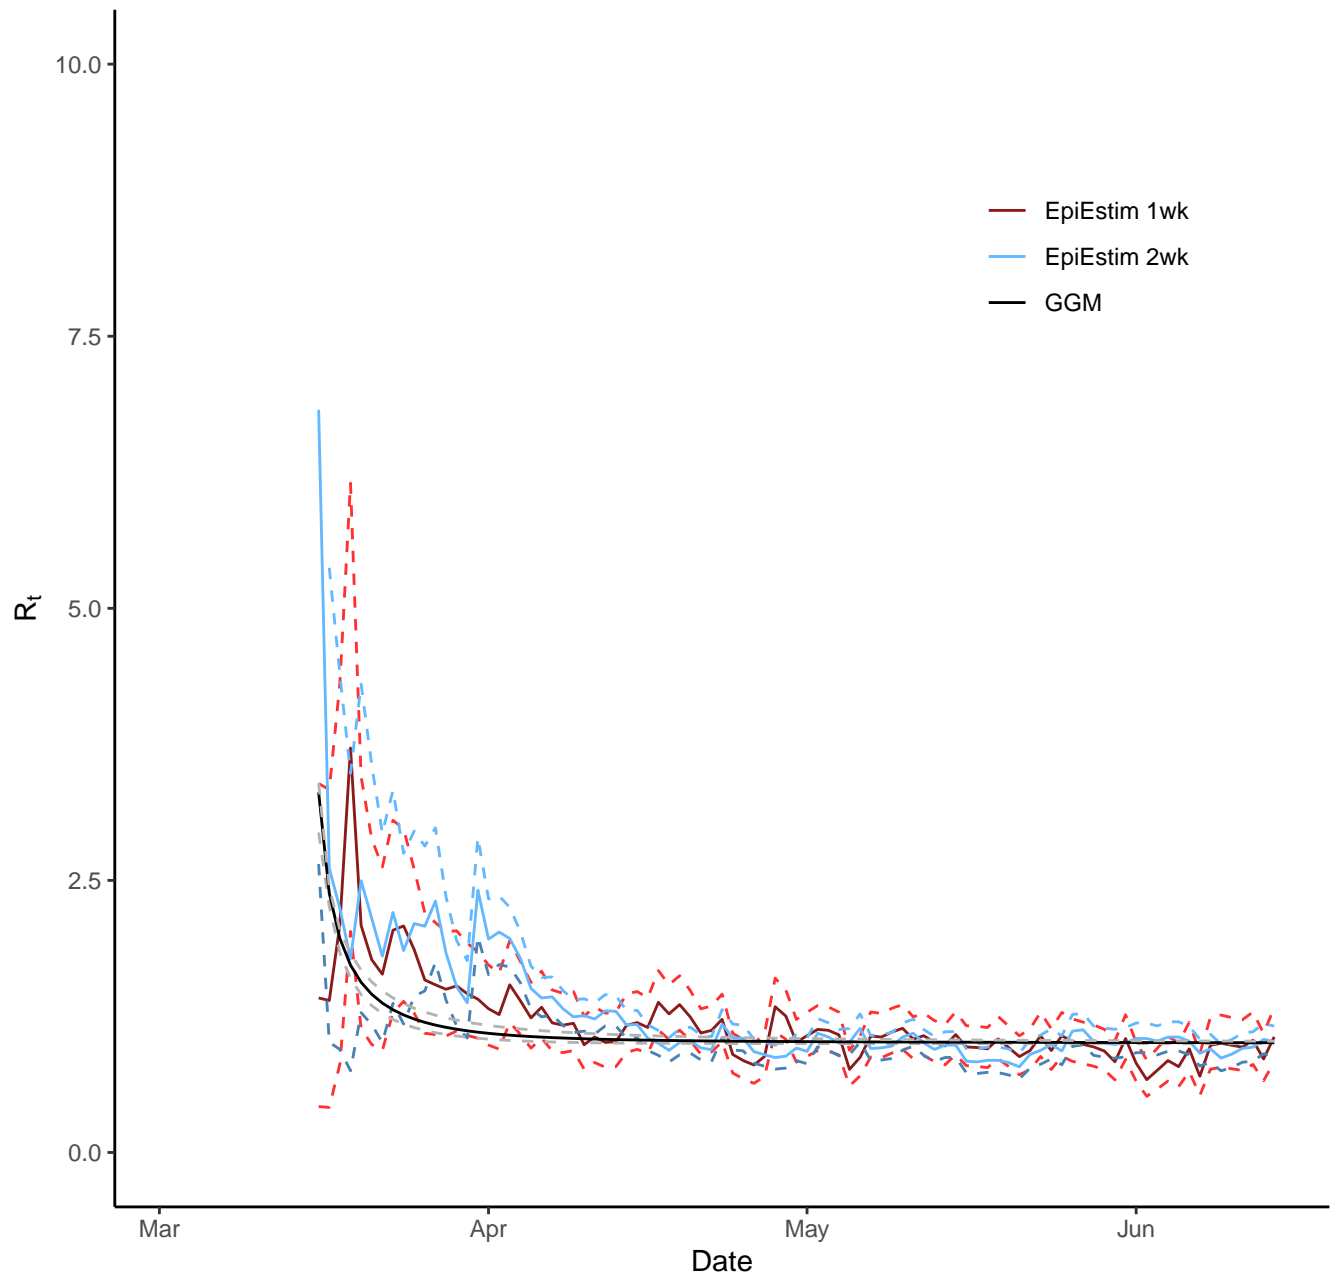

Cobb

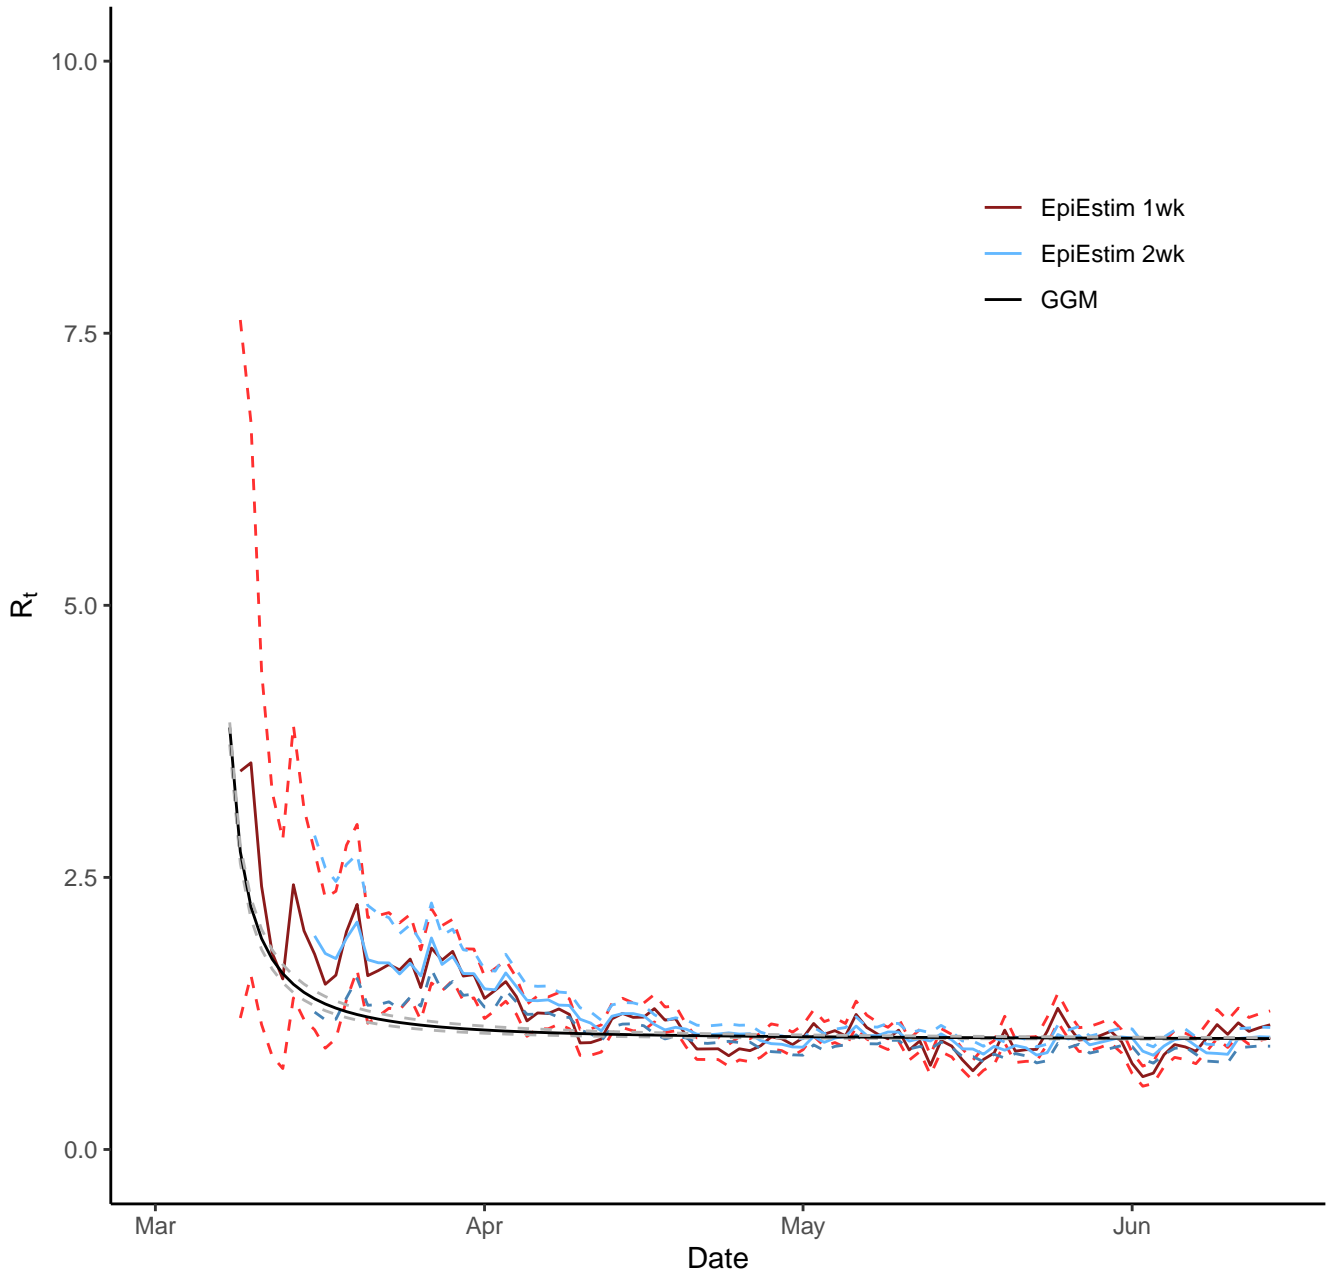

# Coweta

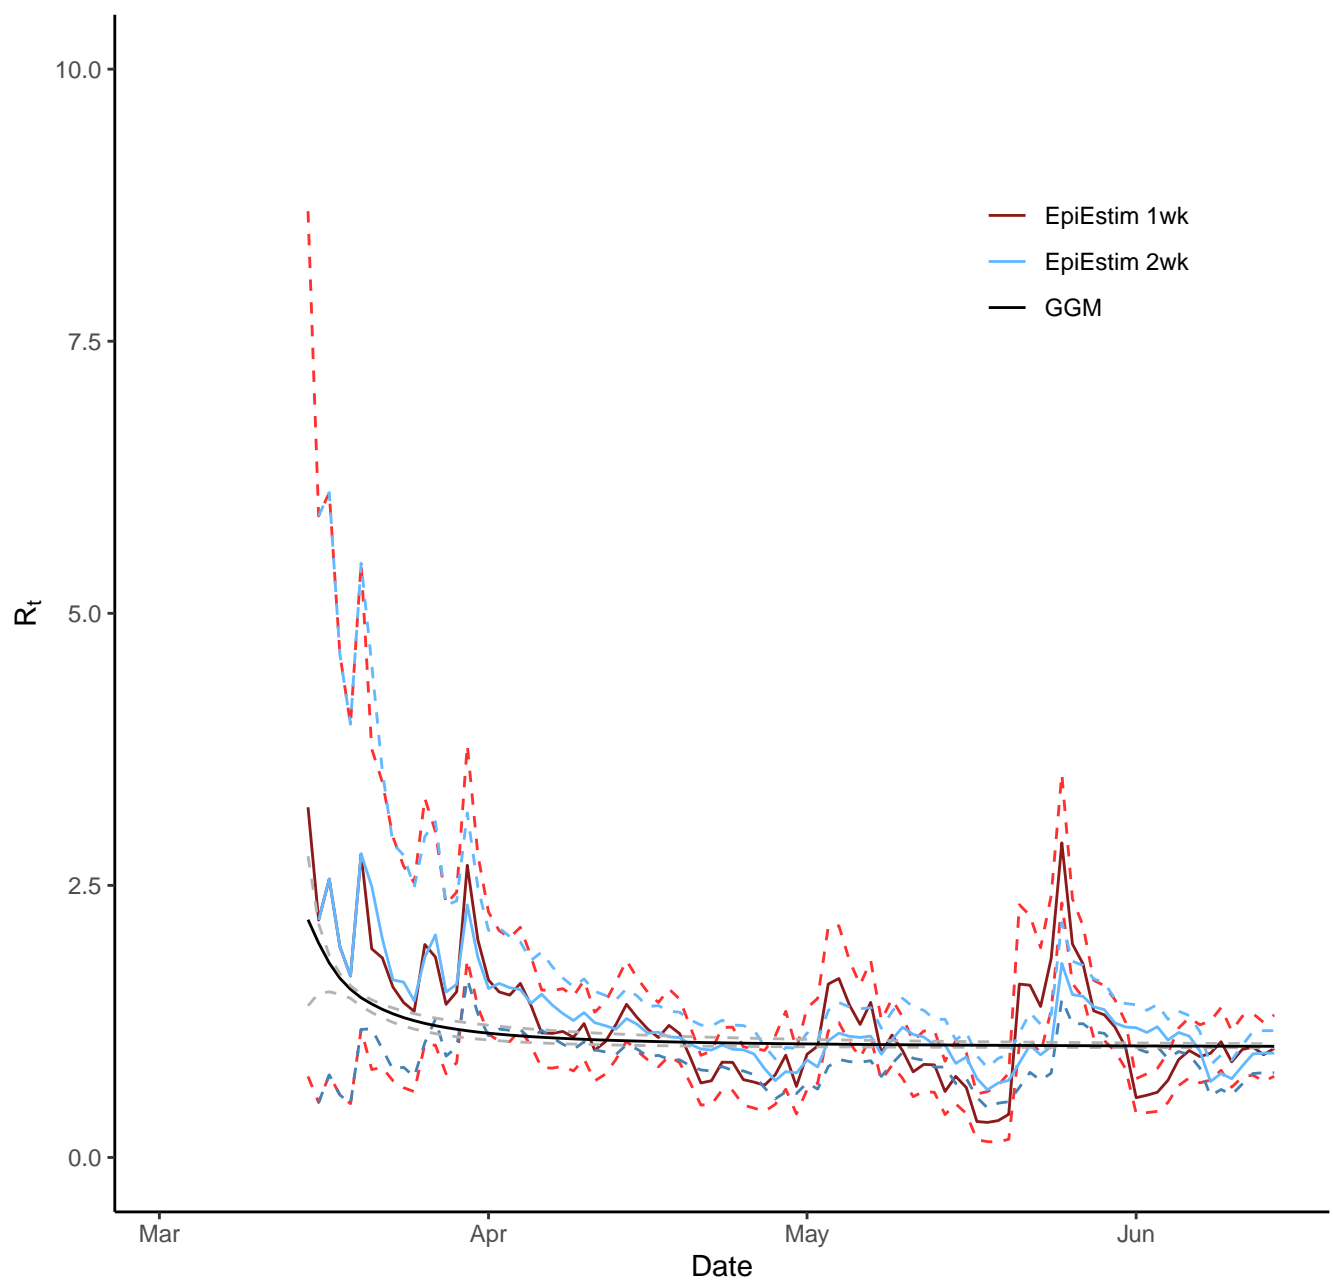

# Dawson

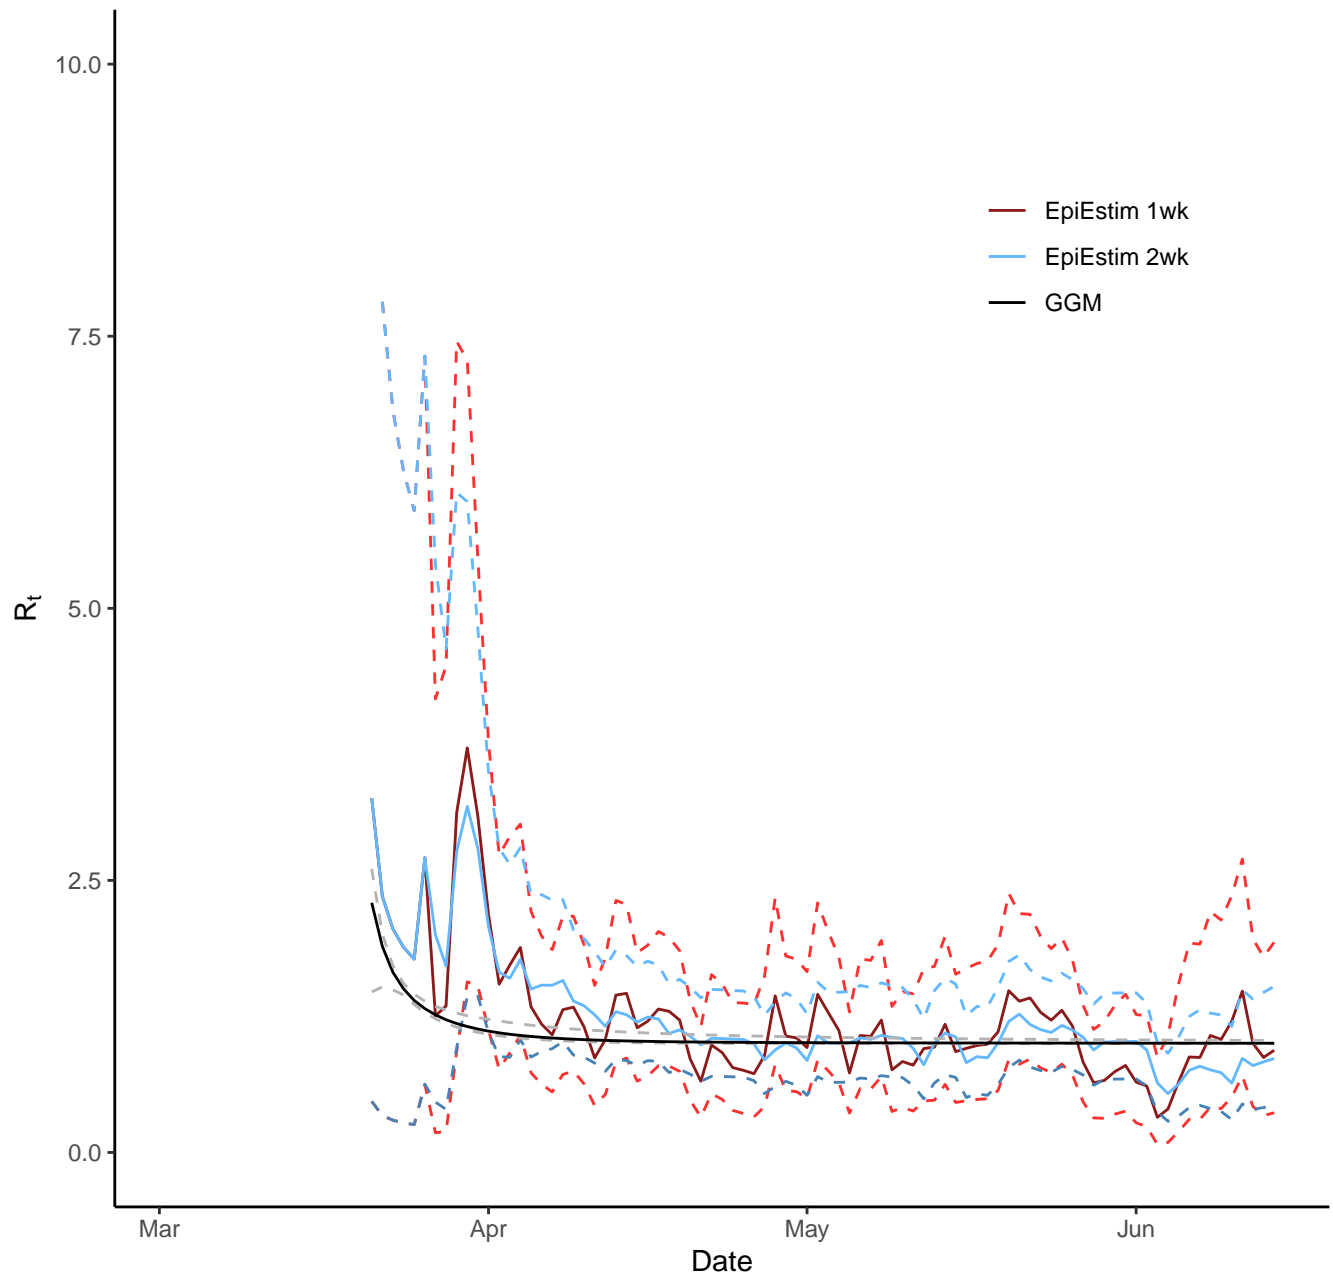



# DeKalb

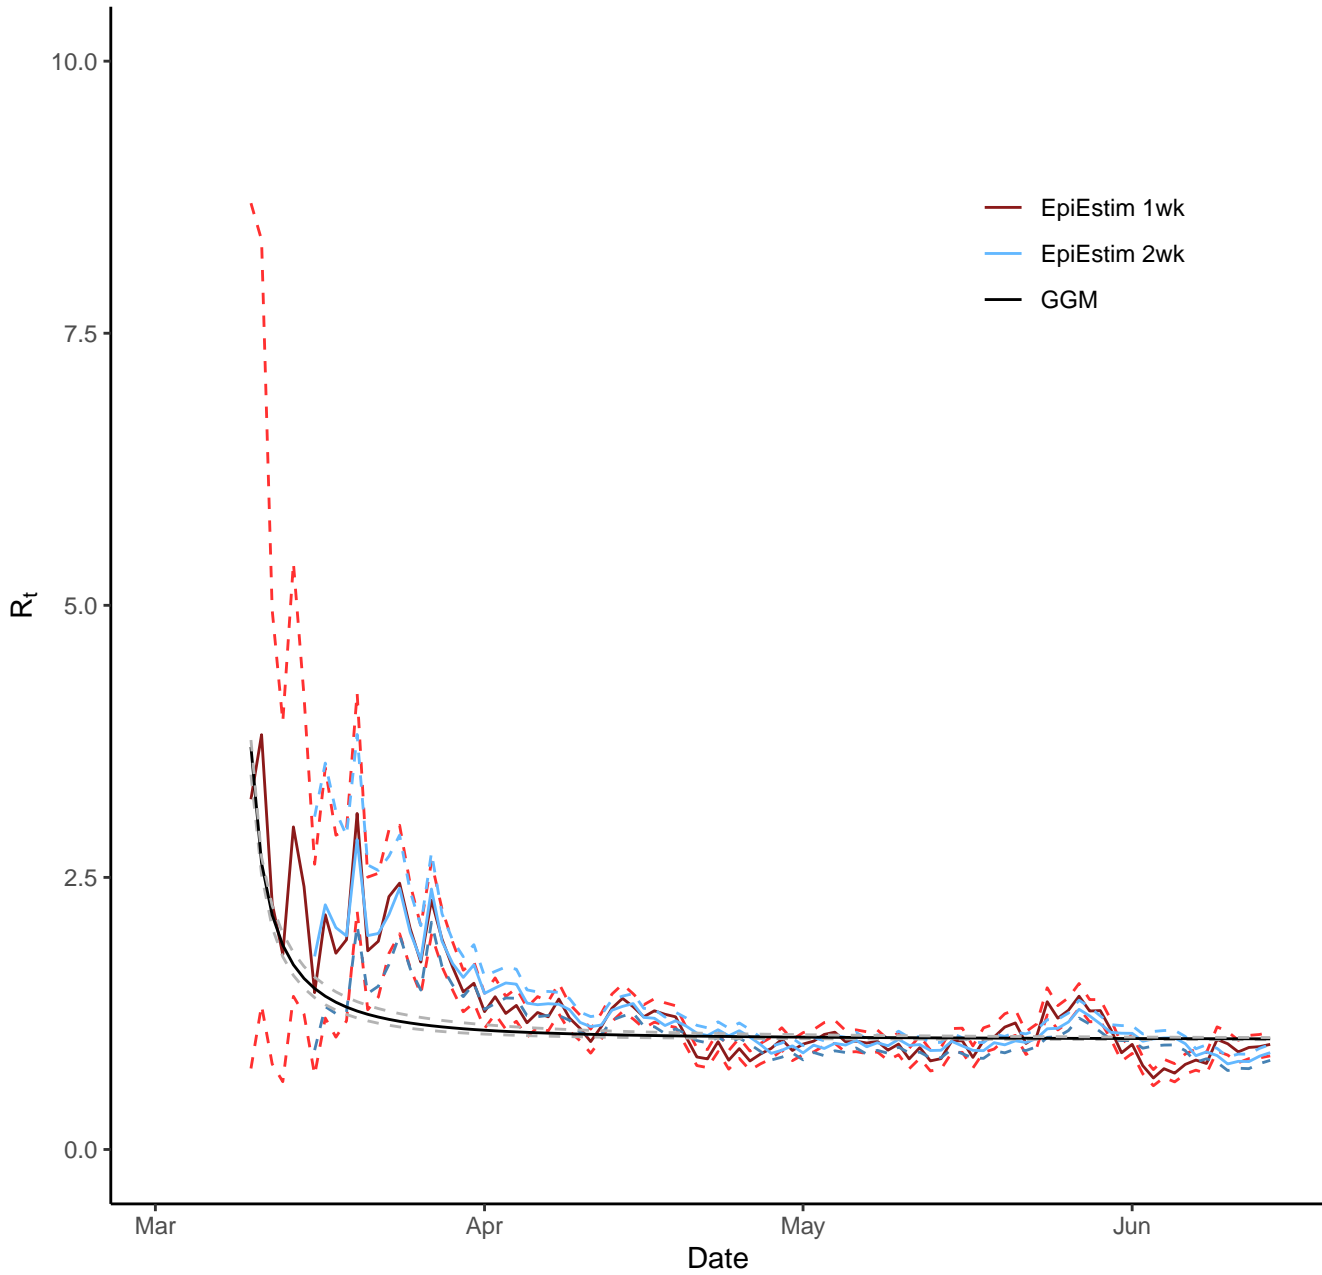

# Douglas

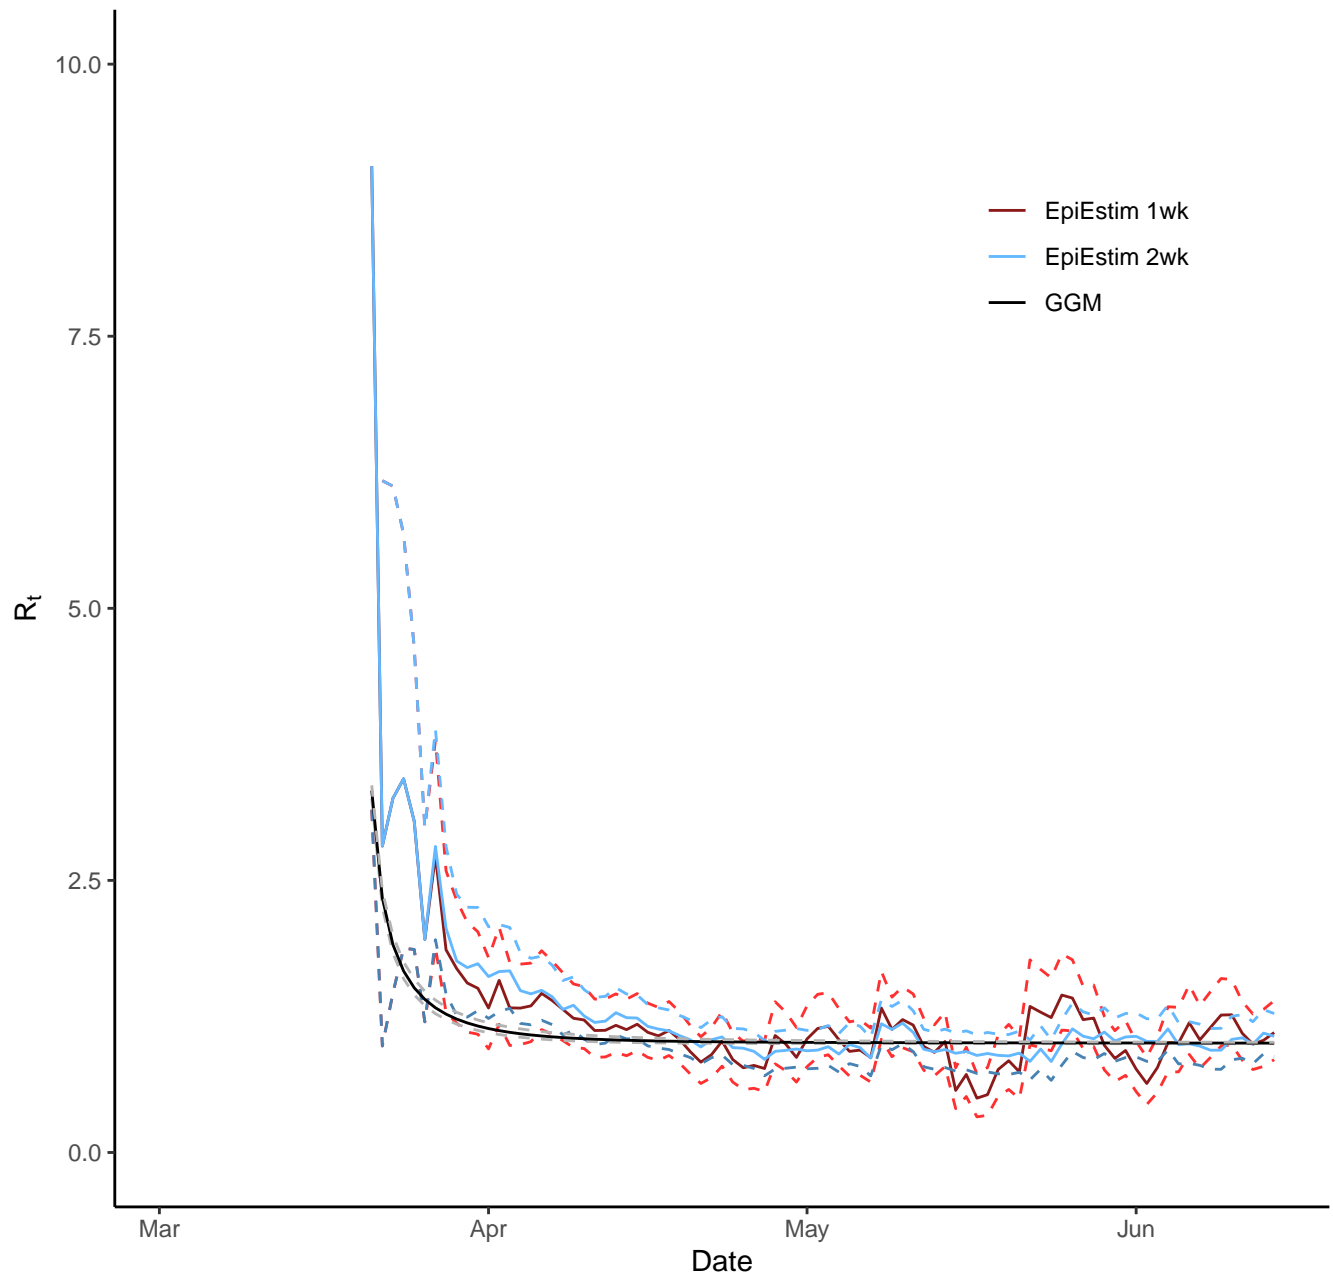

# Fayette

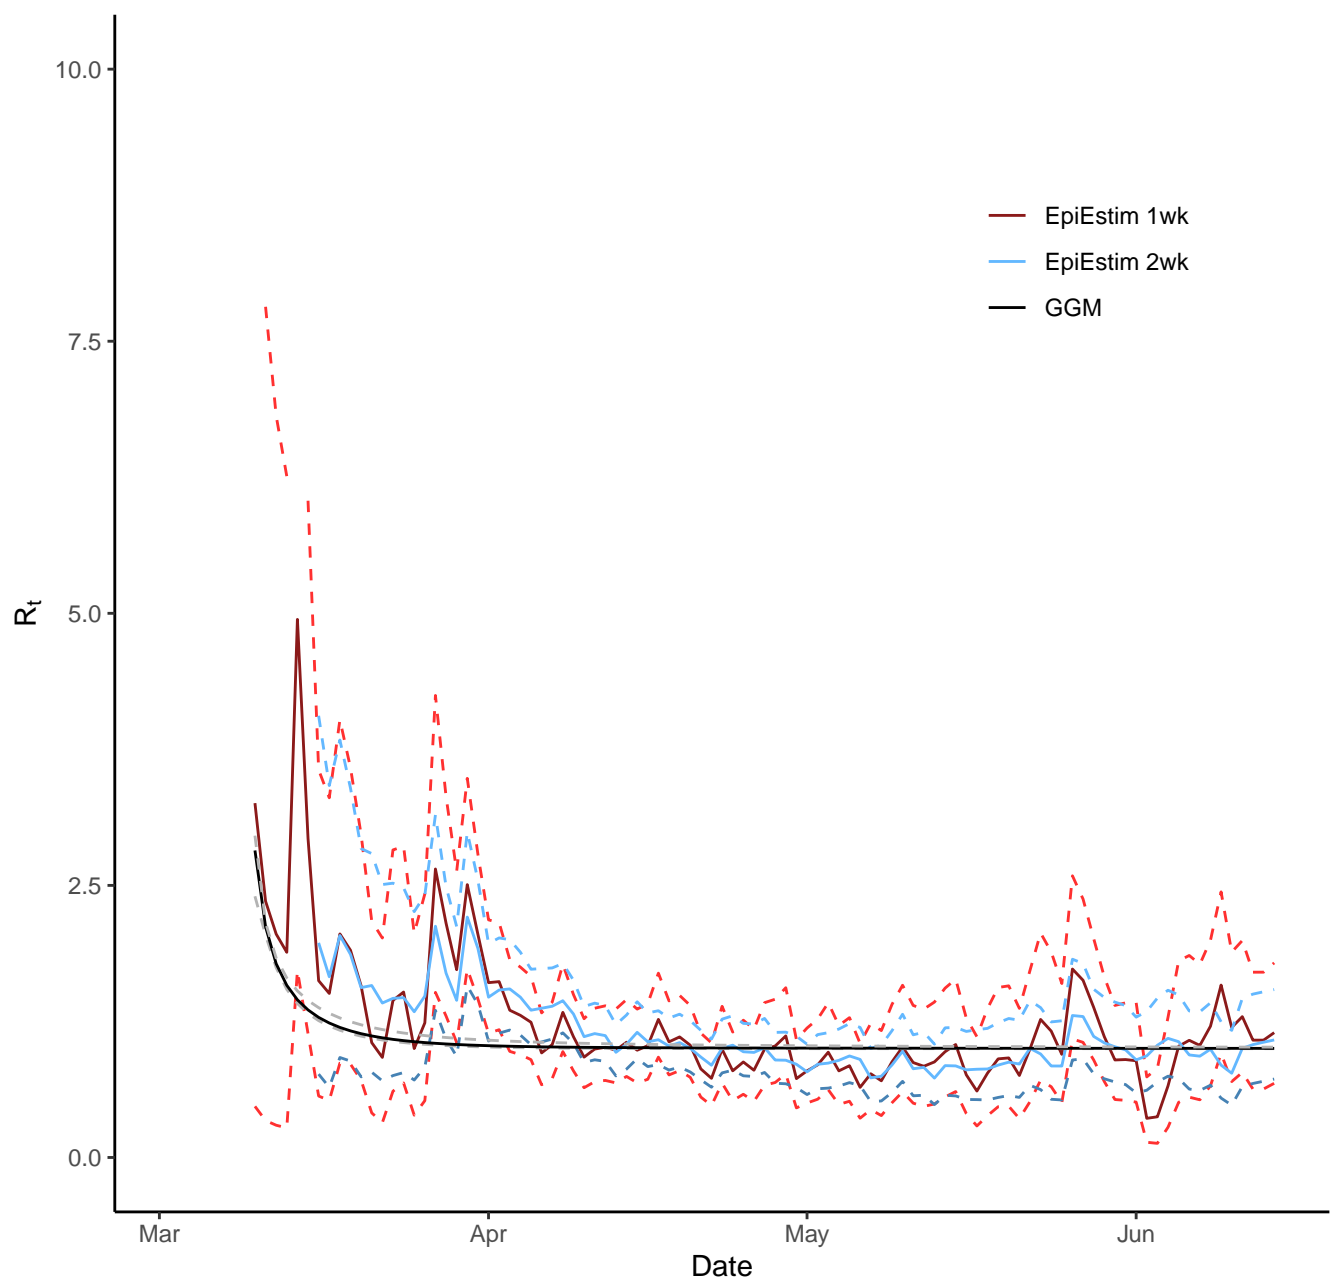

# Forsyth

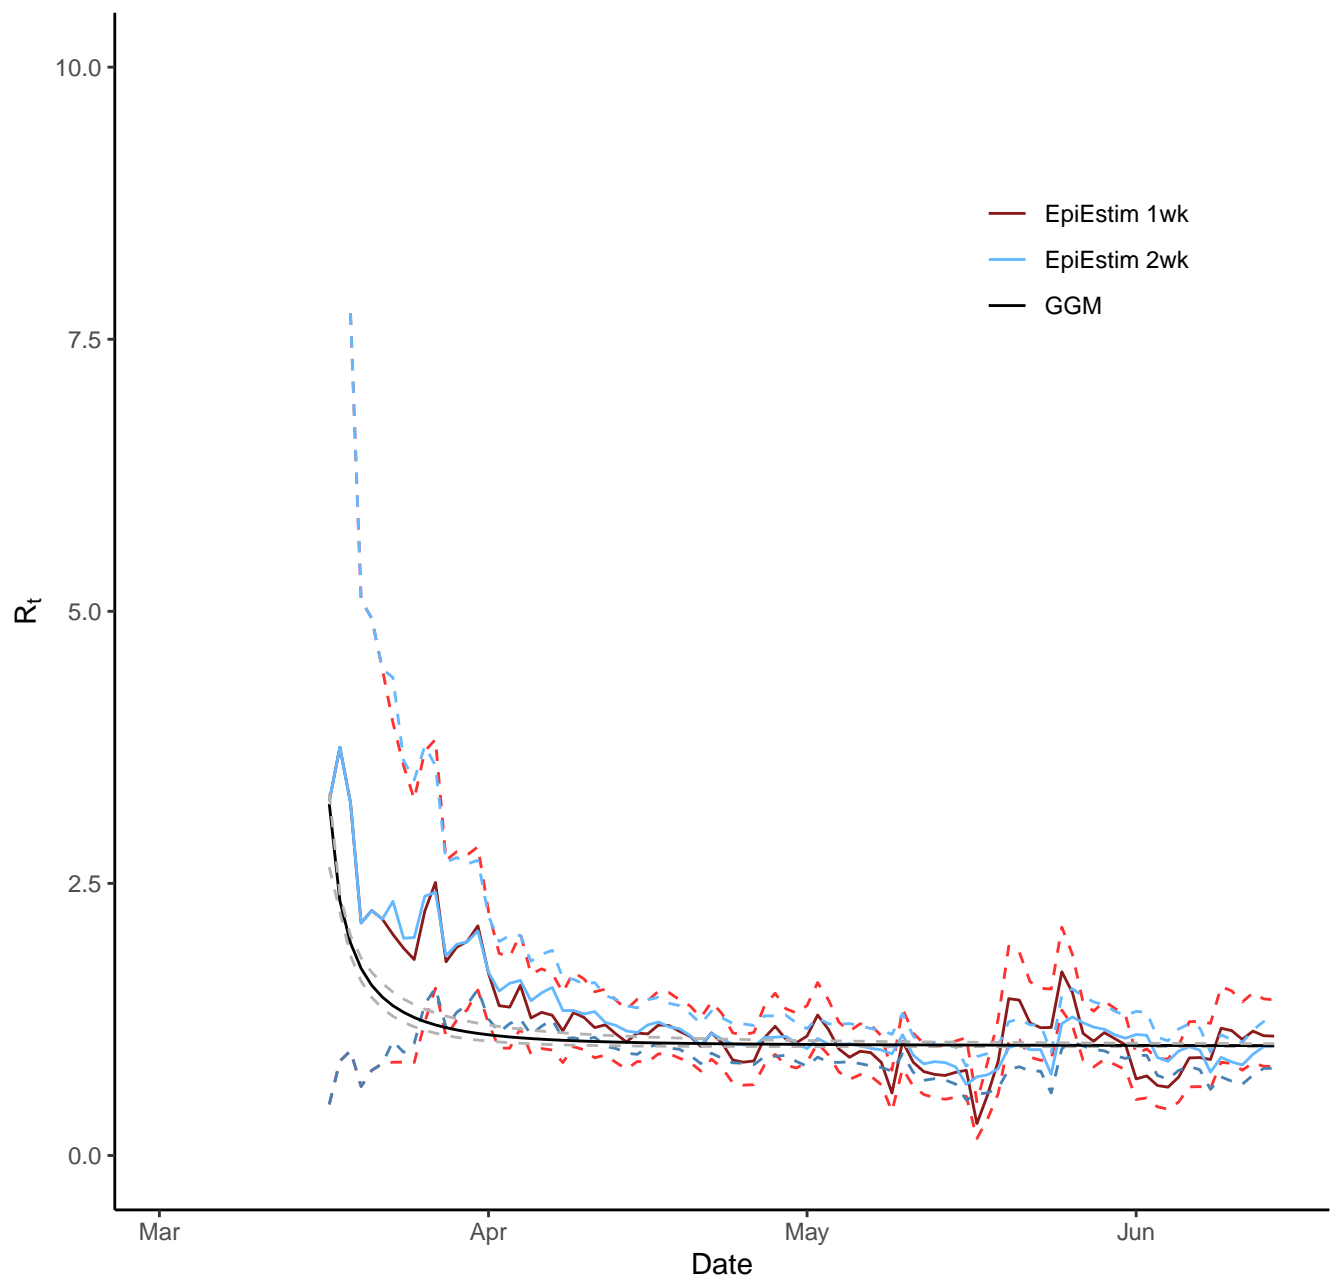

# Fulton

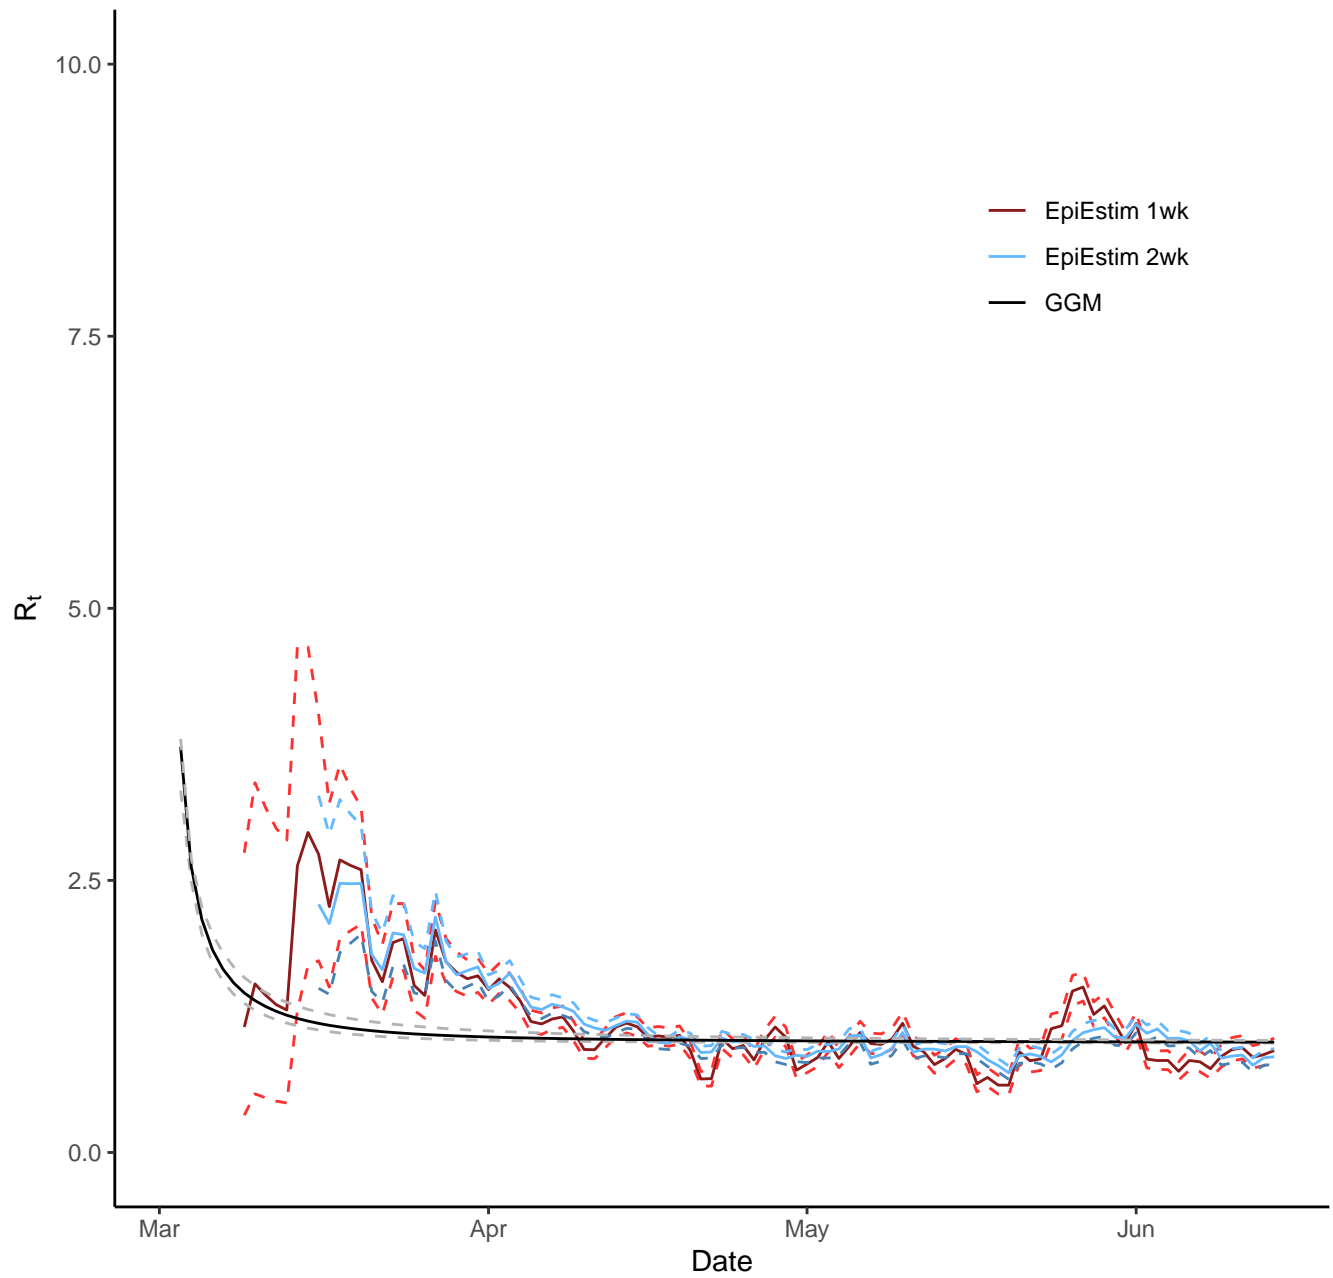

# Gwinnett

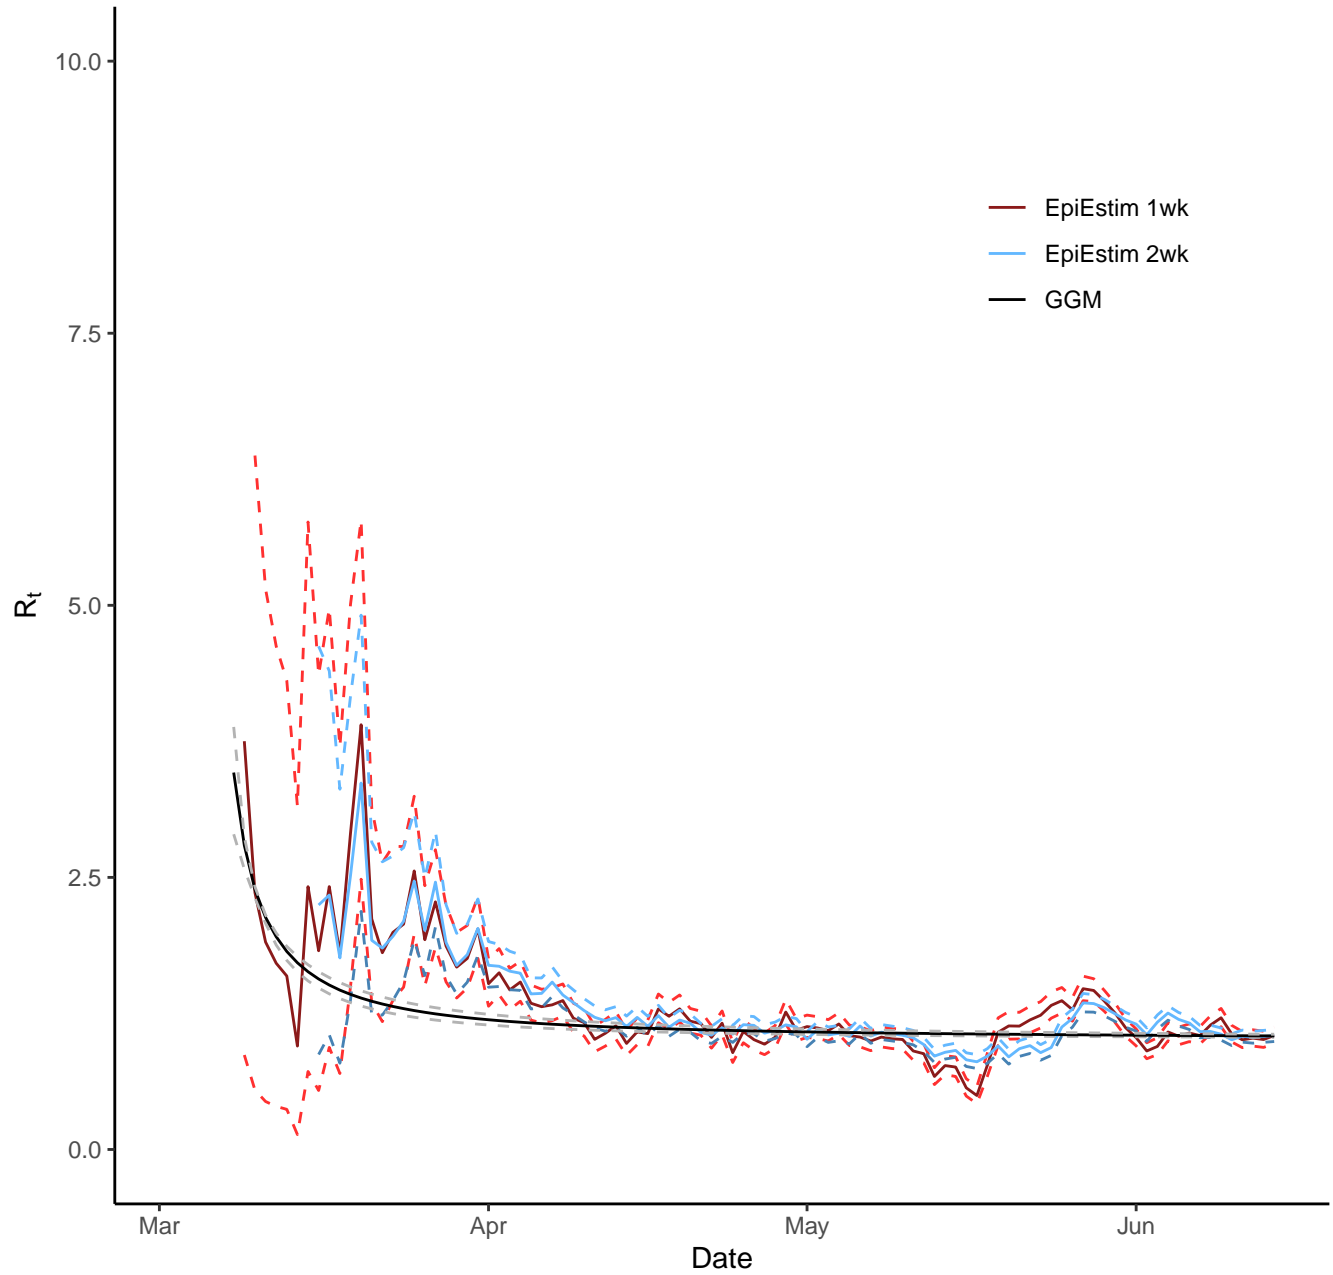

# Hall

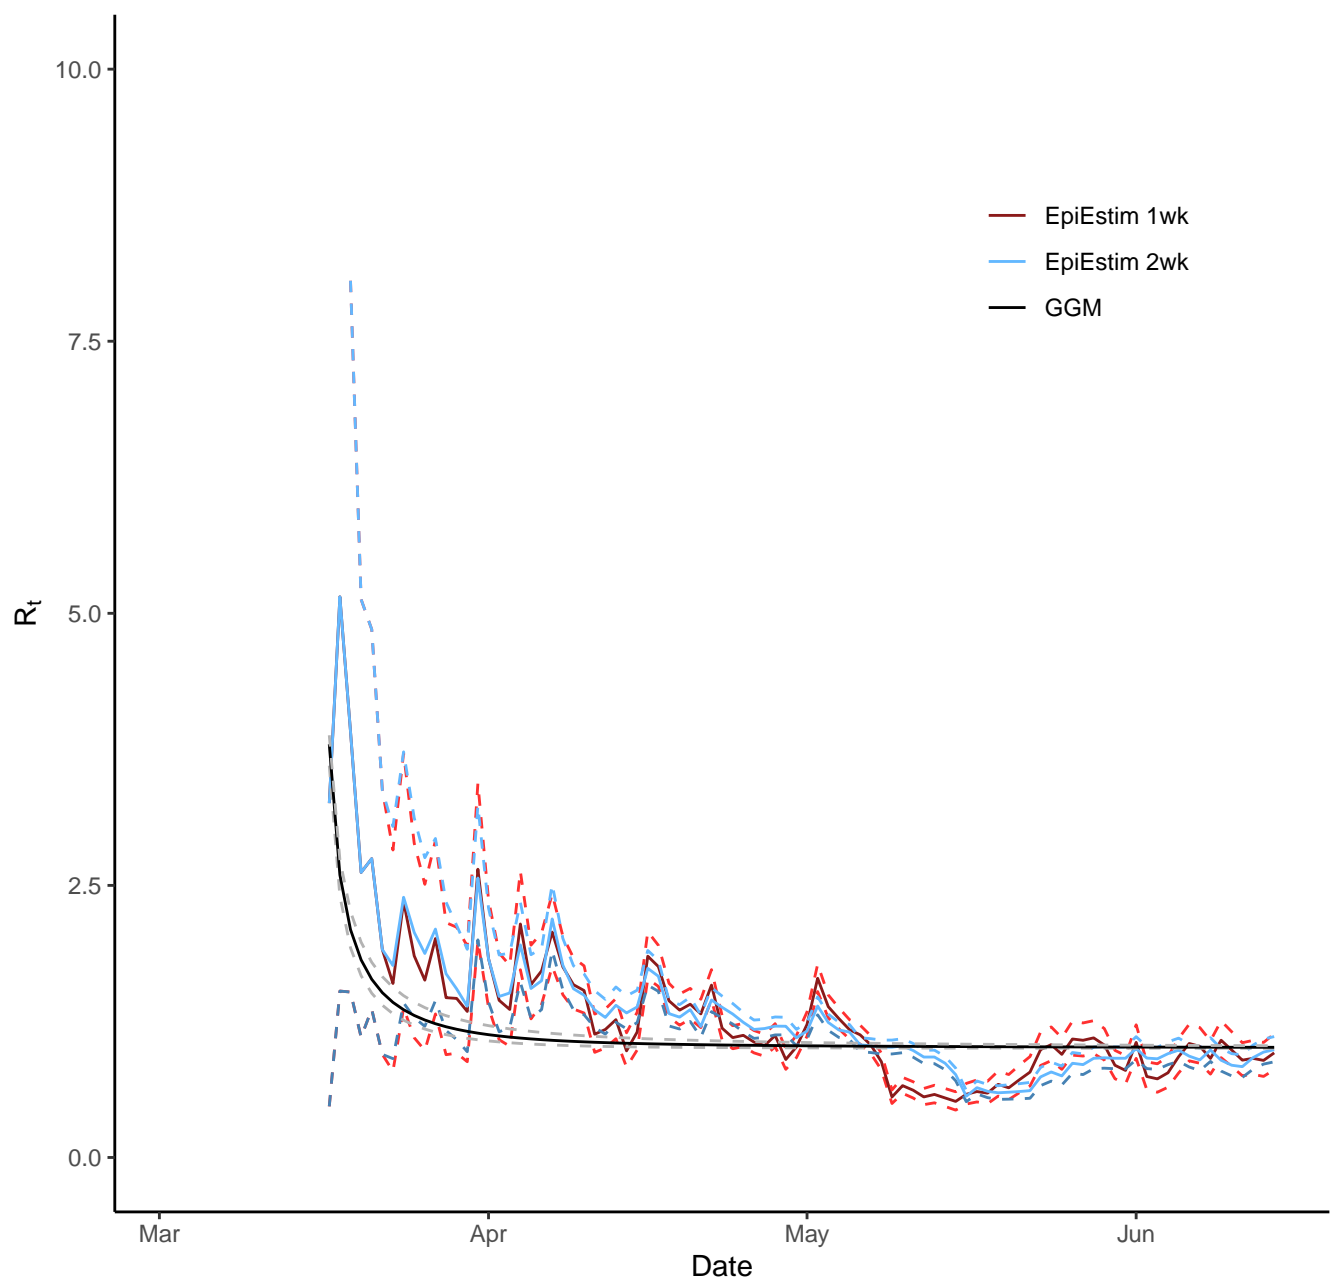

# Haralson

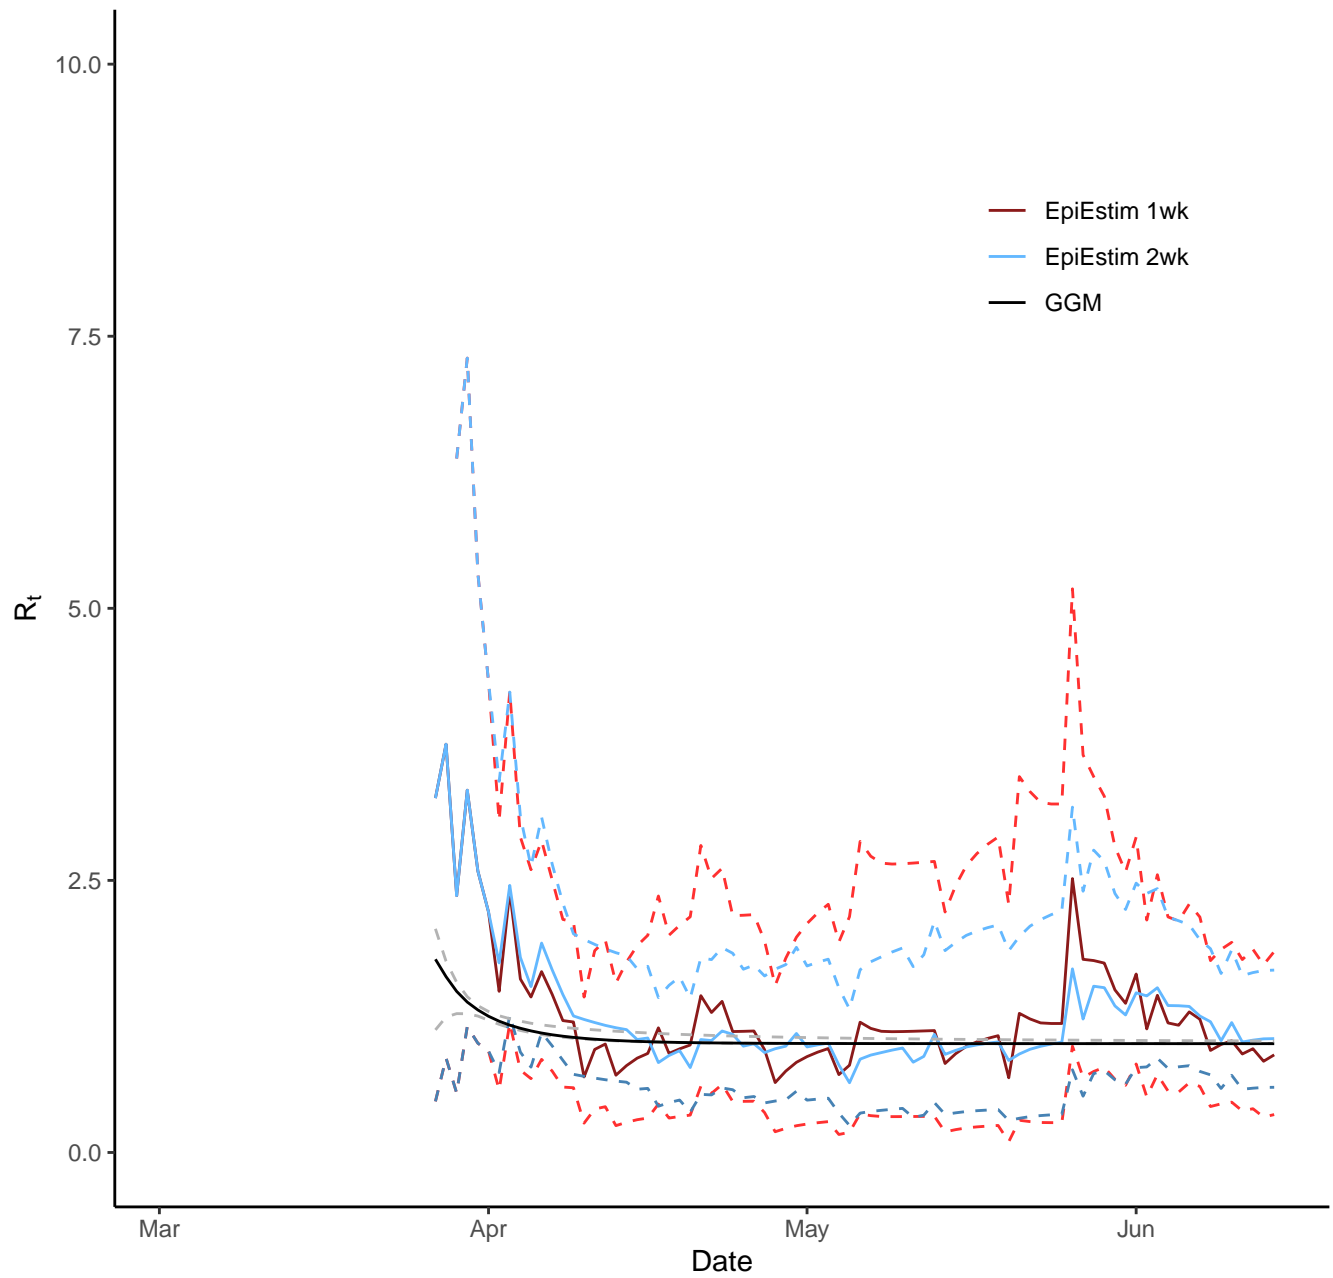



# Heard

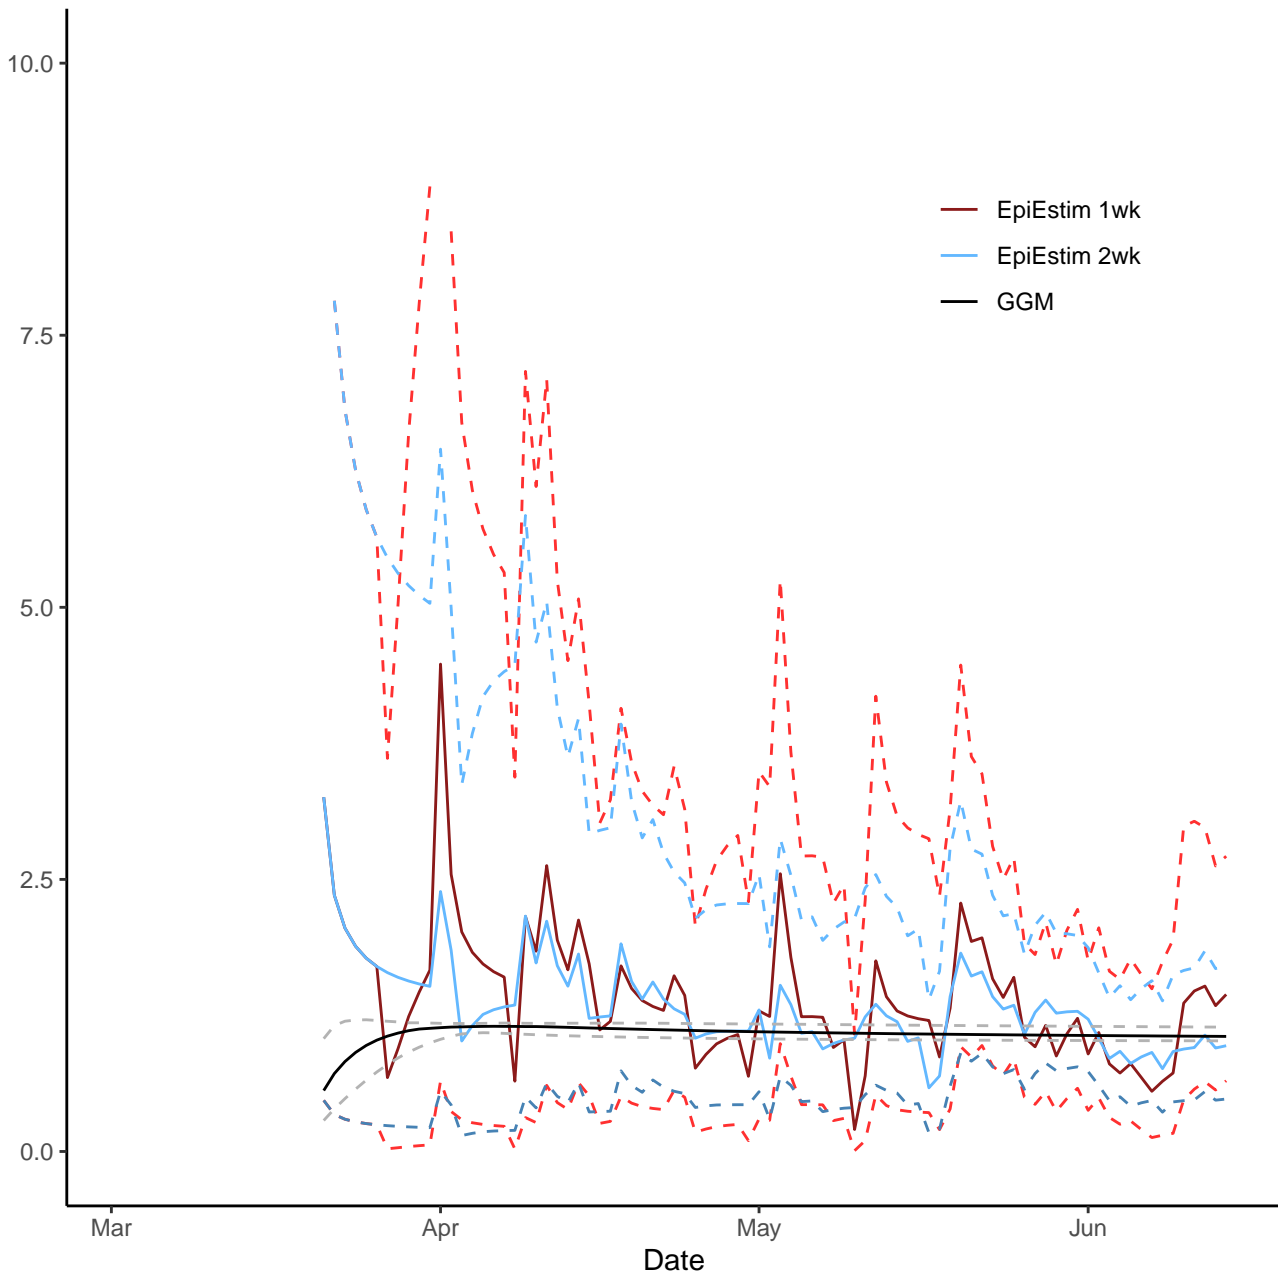

Henry

10.0

7.5

5.0

2.5

0.0

- EpiEstim 1wk
- EpiEstim 2wk
- GGM

$R_t$

Mar

Apr

May

Jun

Date

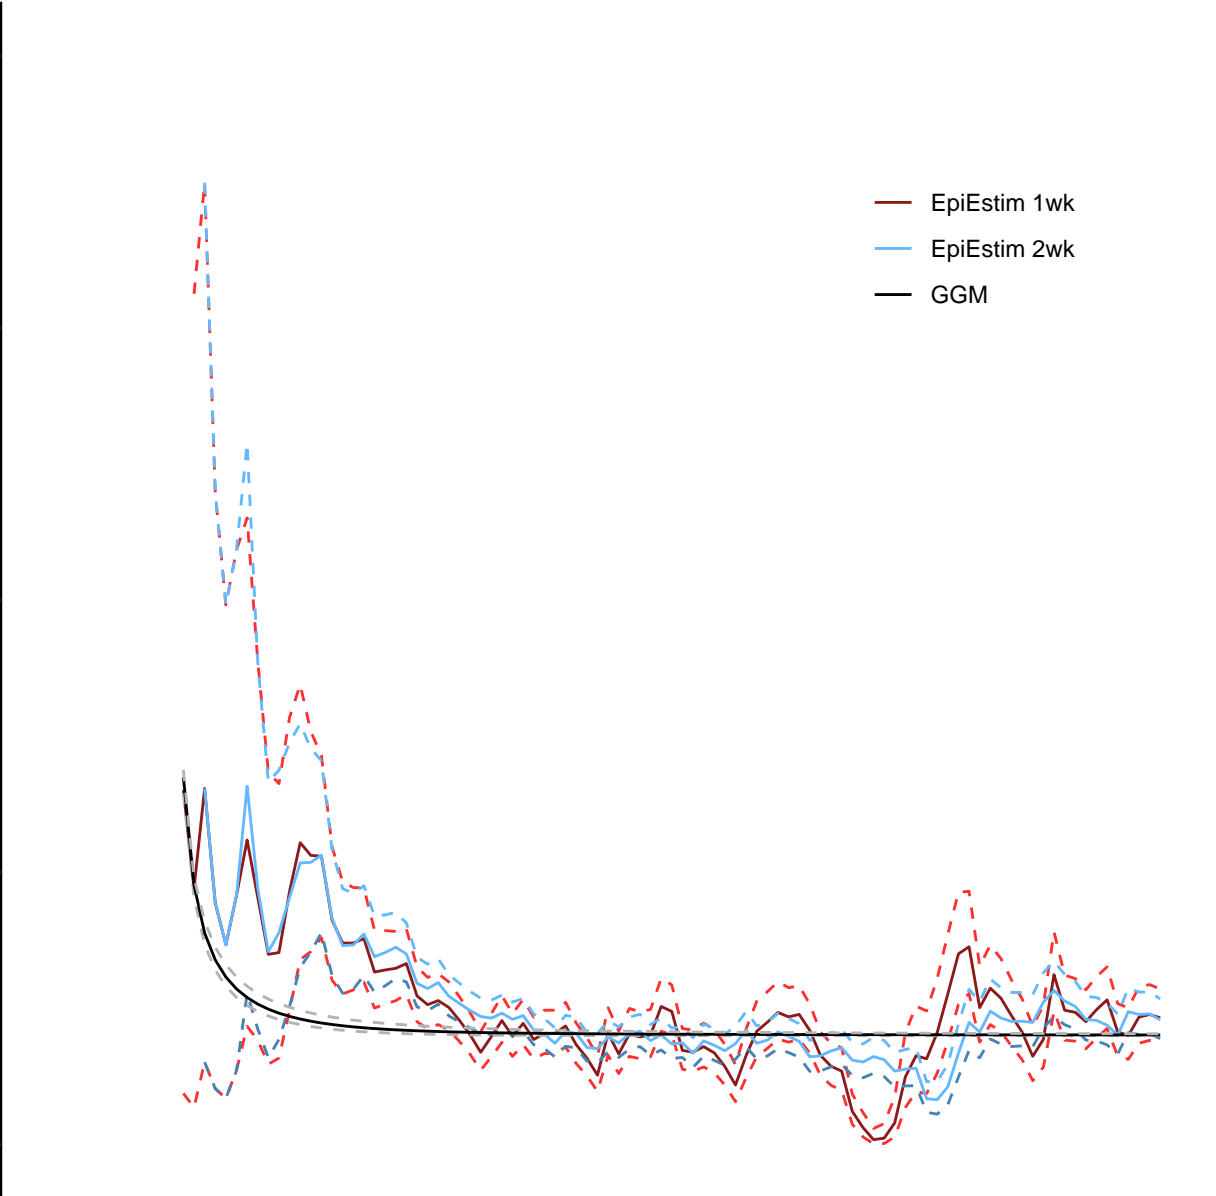

# Jasper

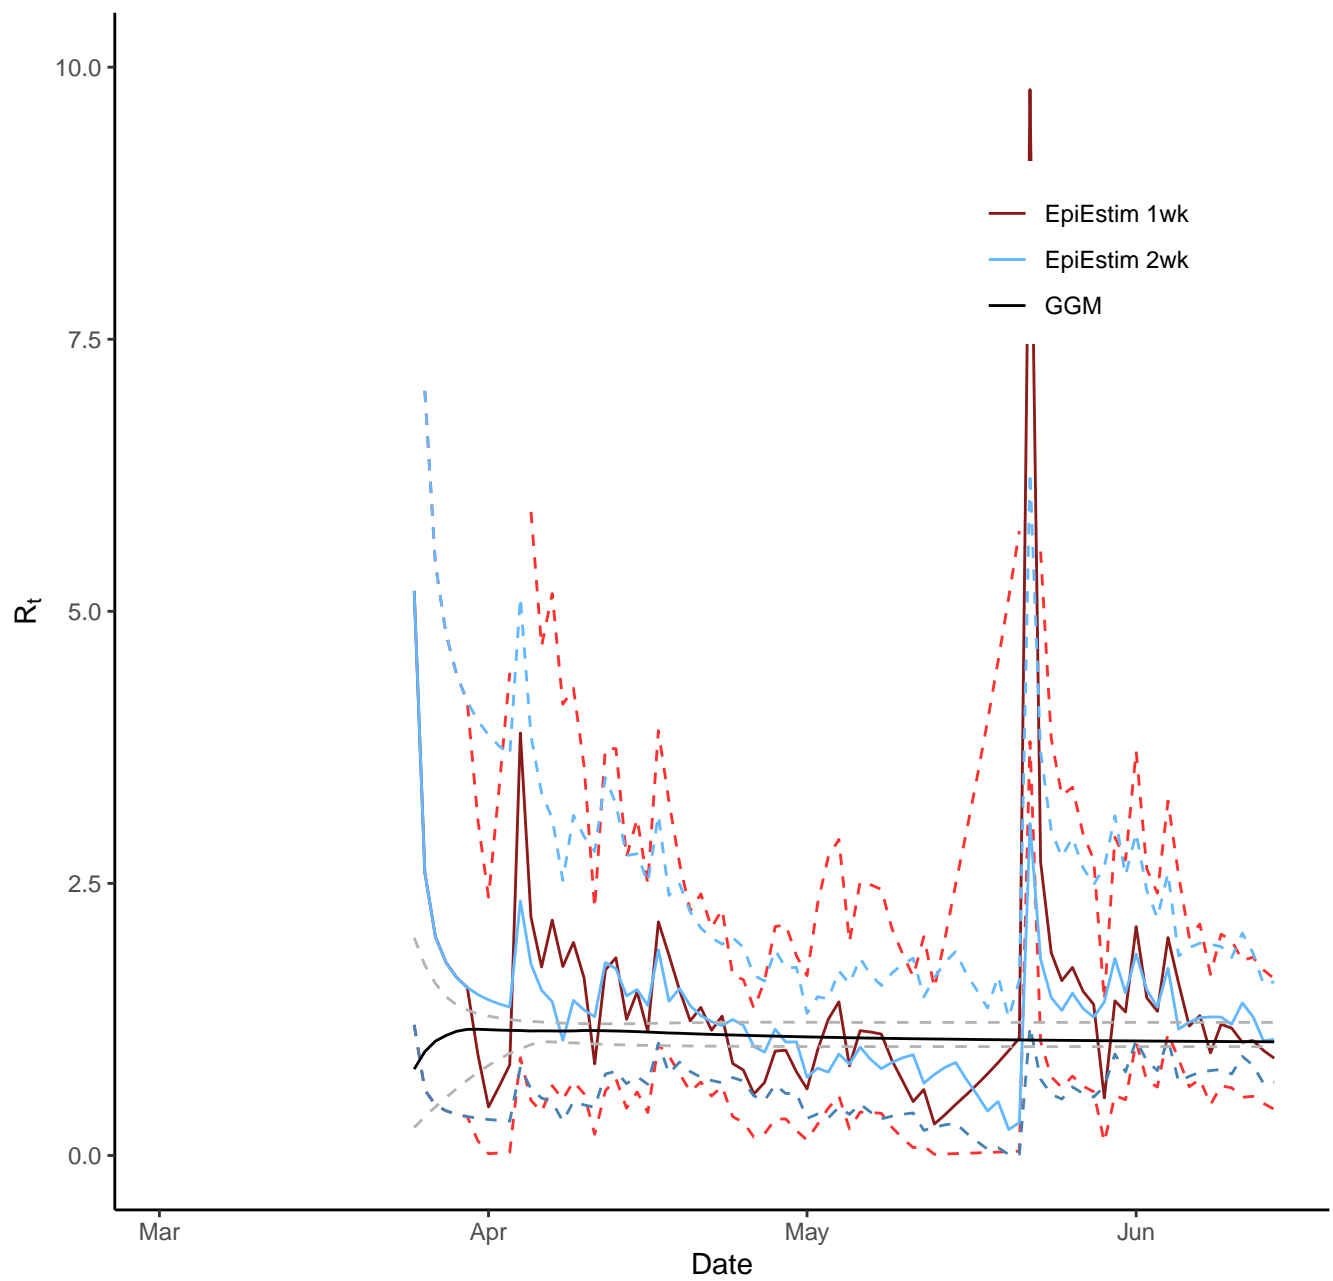

# Lamar

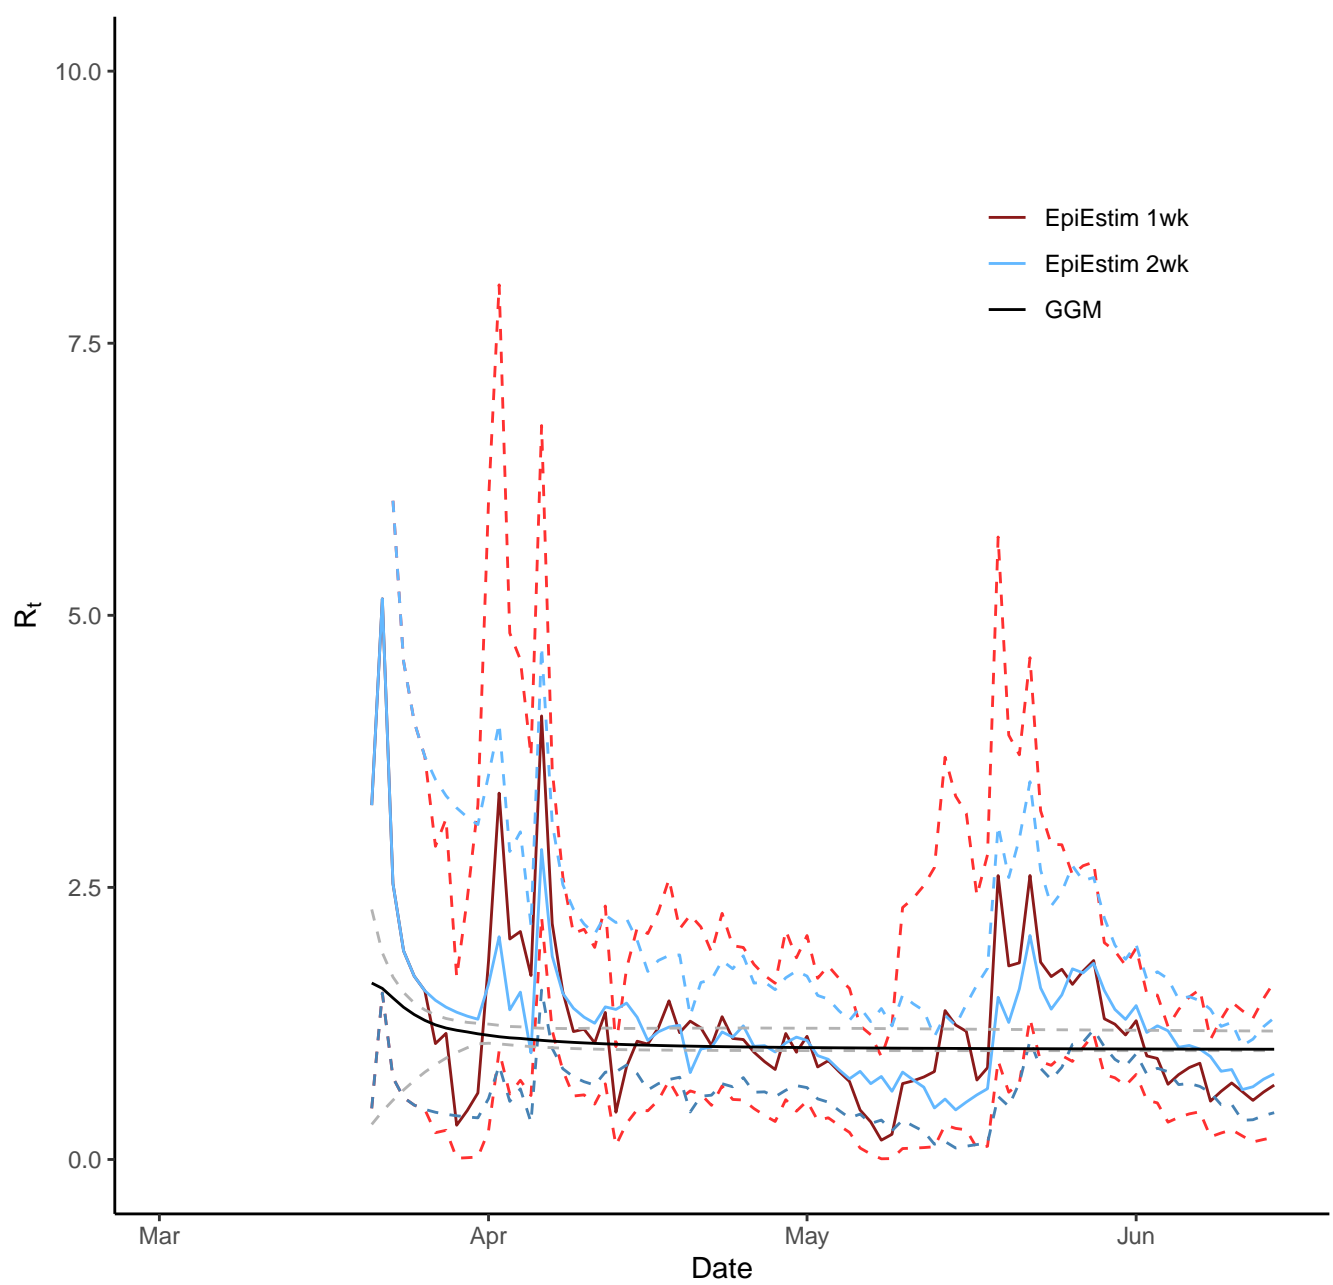

# Meriwether

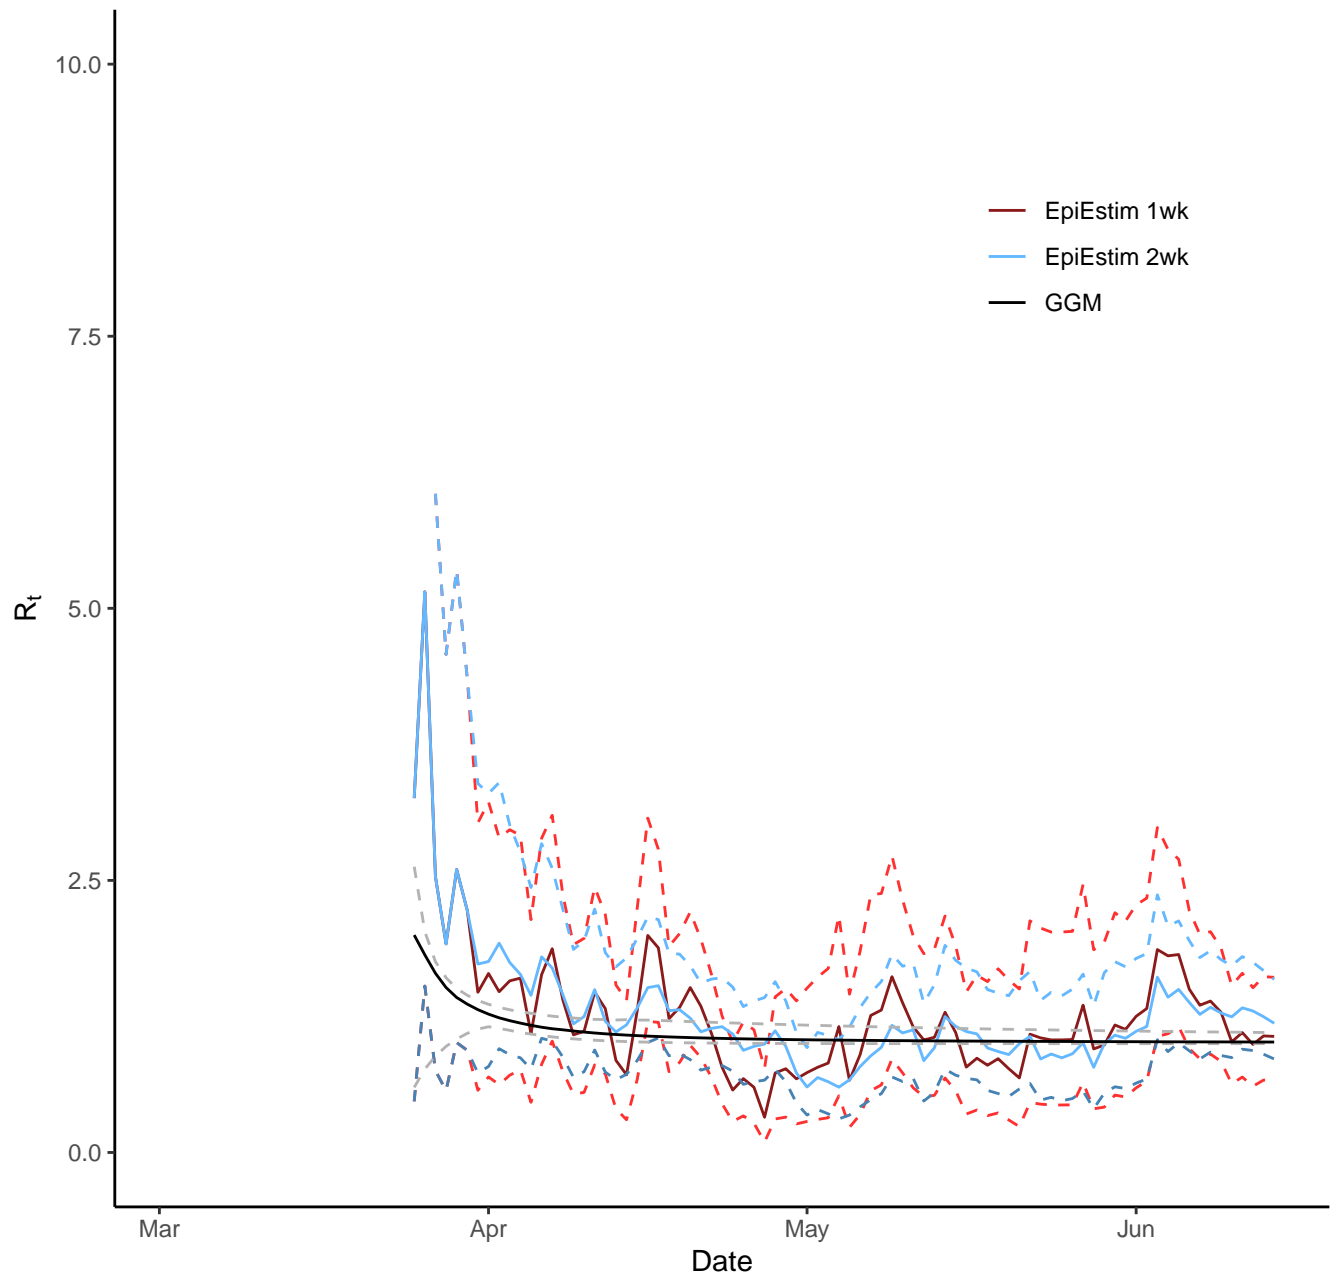

# Morgan

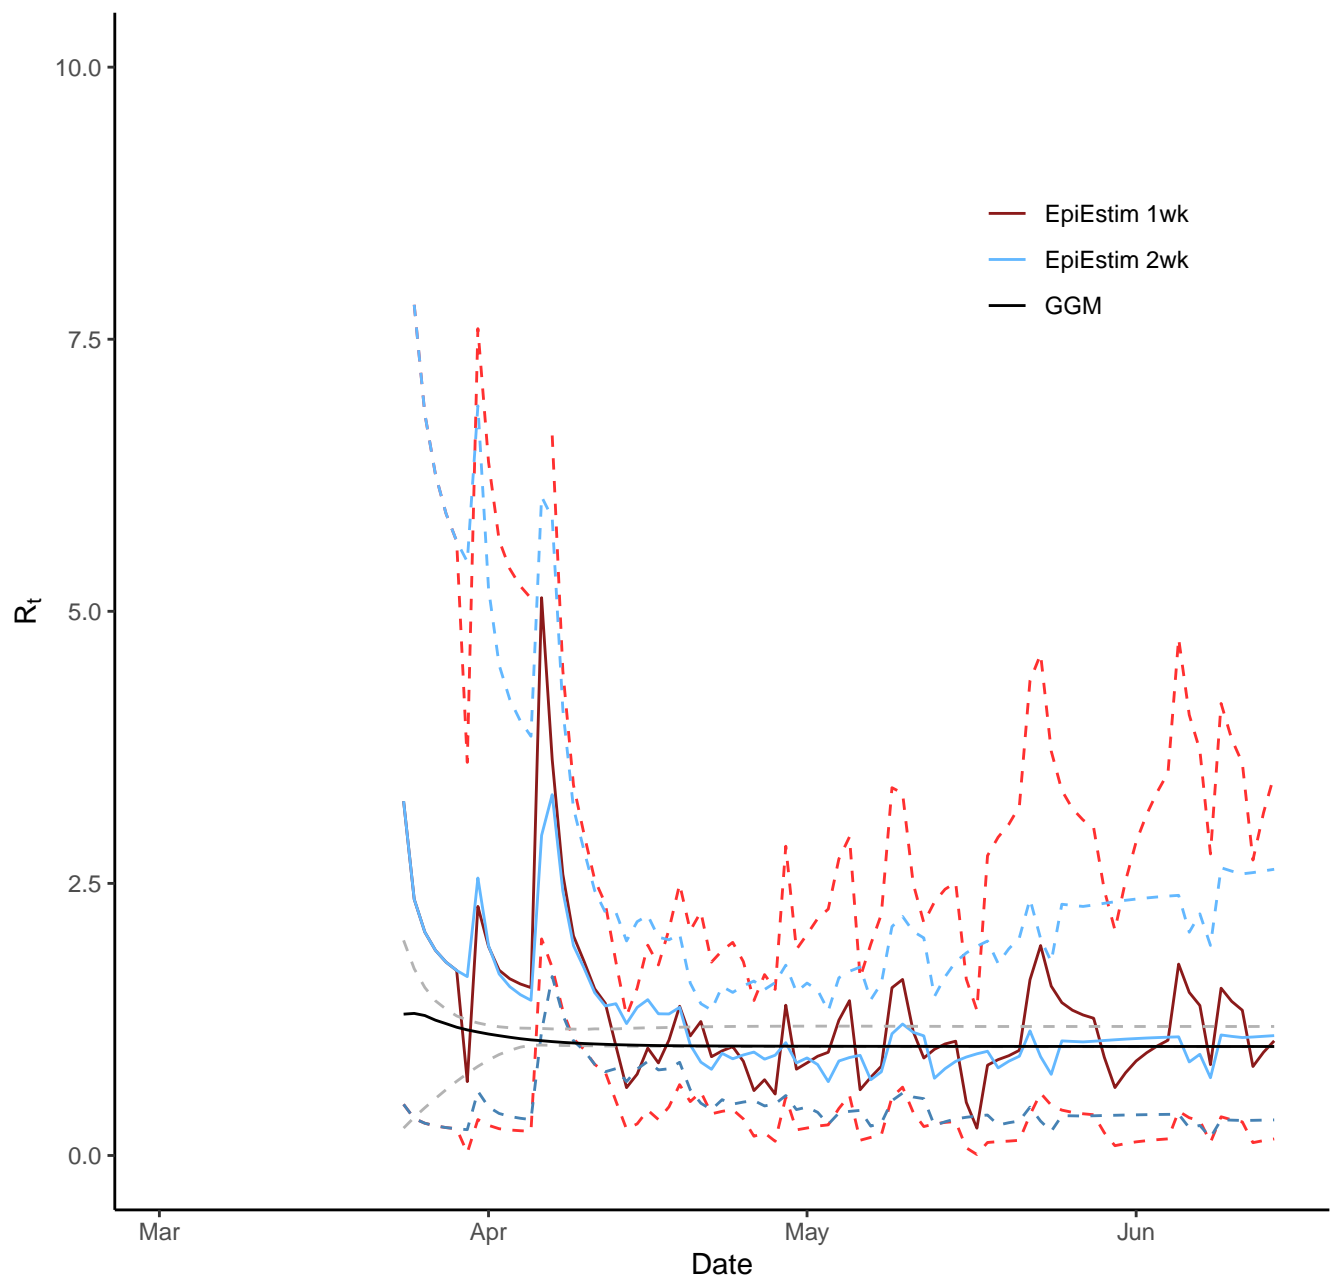

# Newton

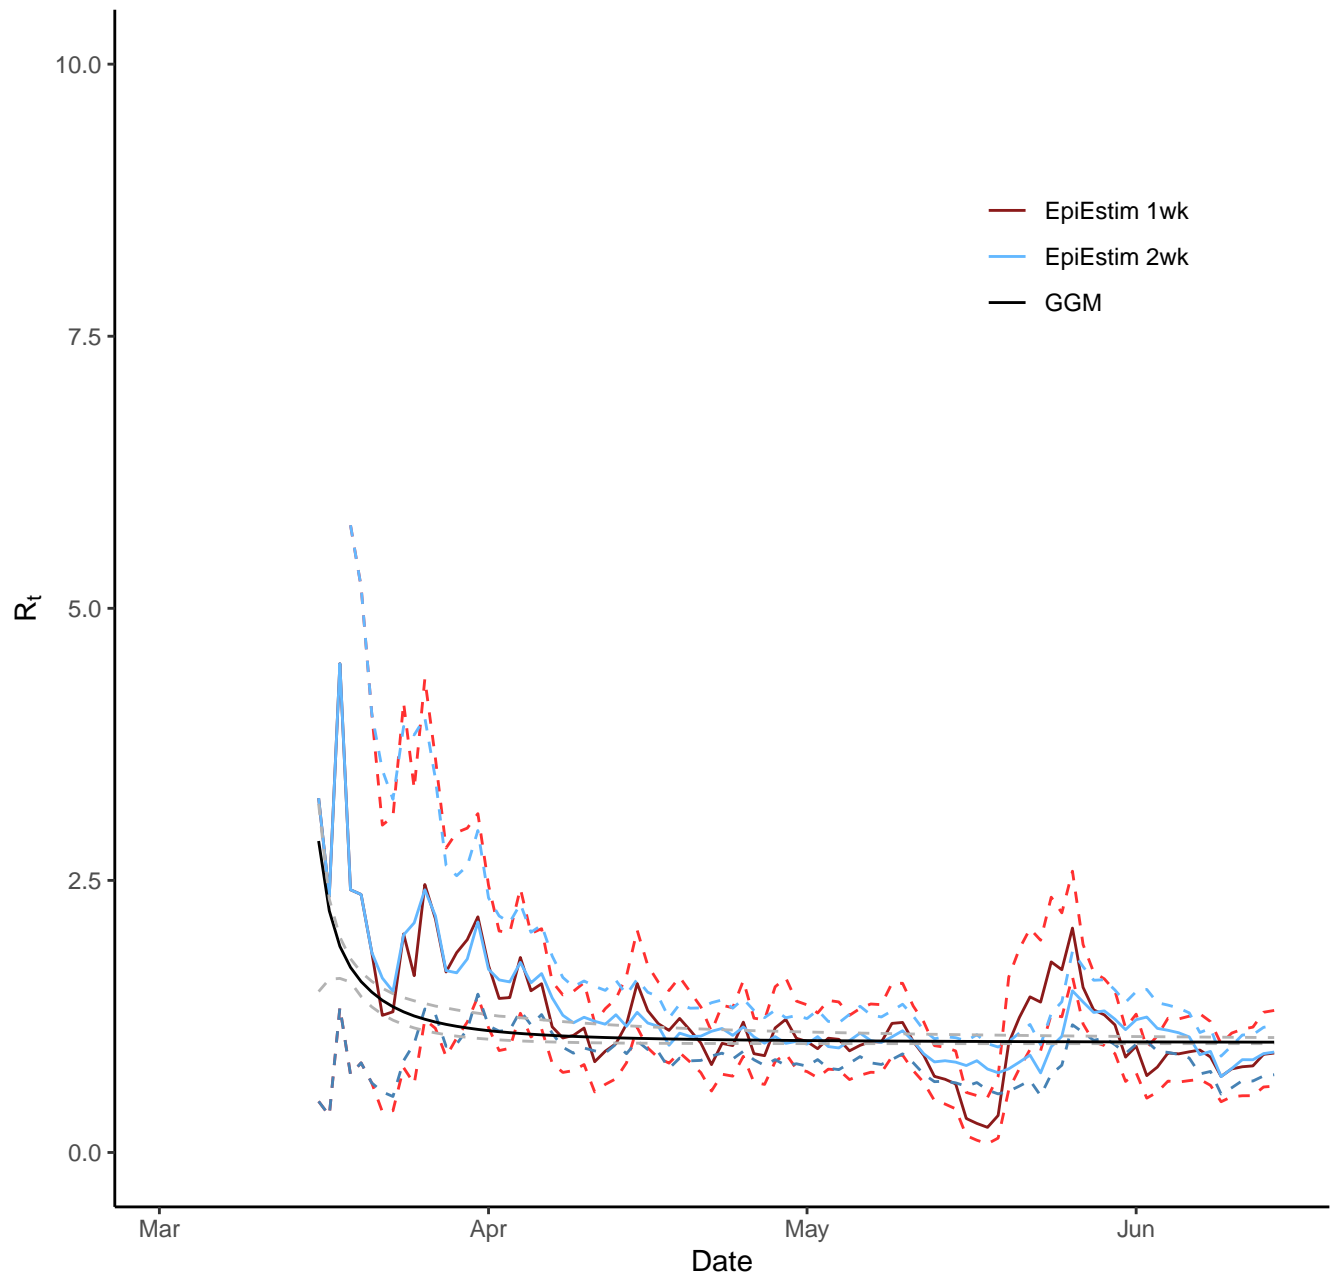

# Paulding

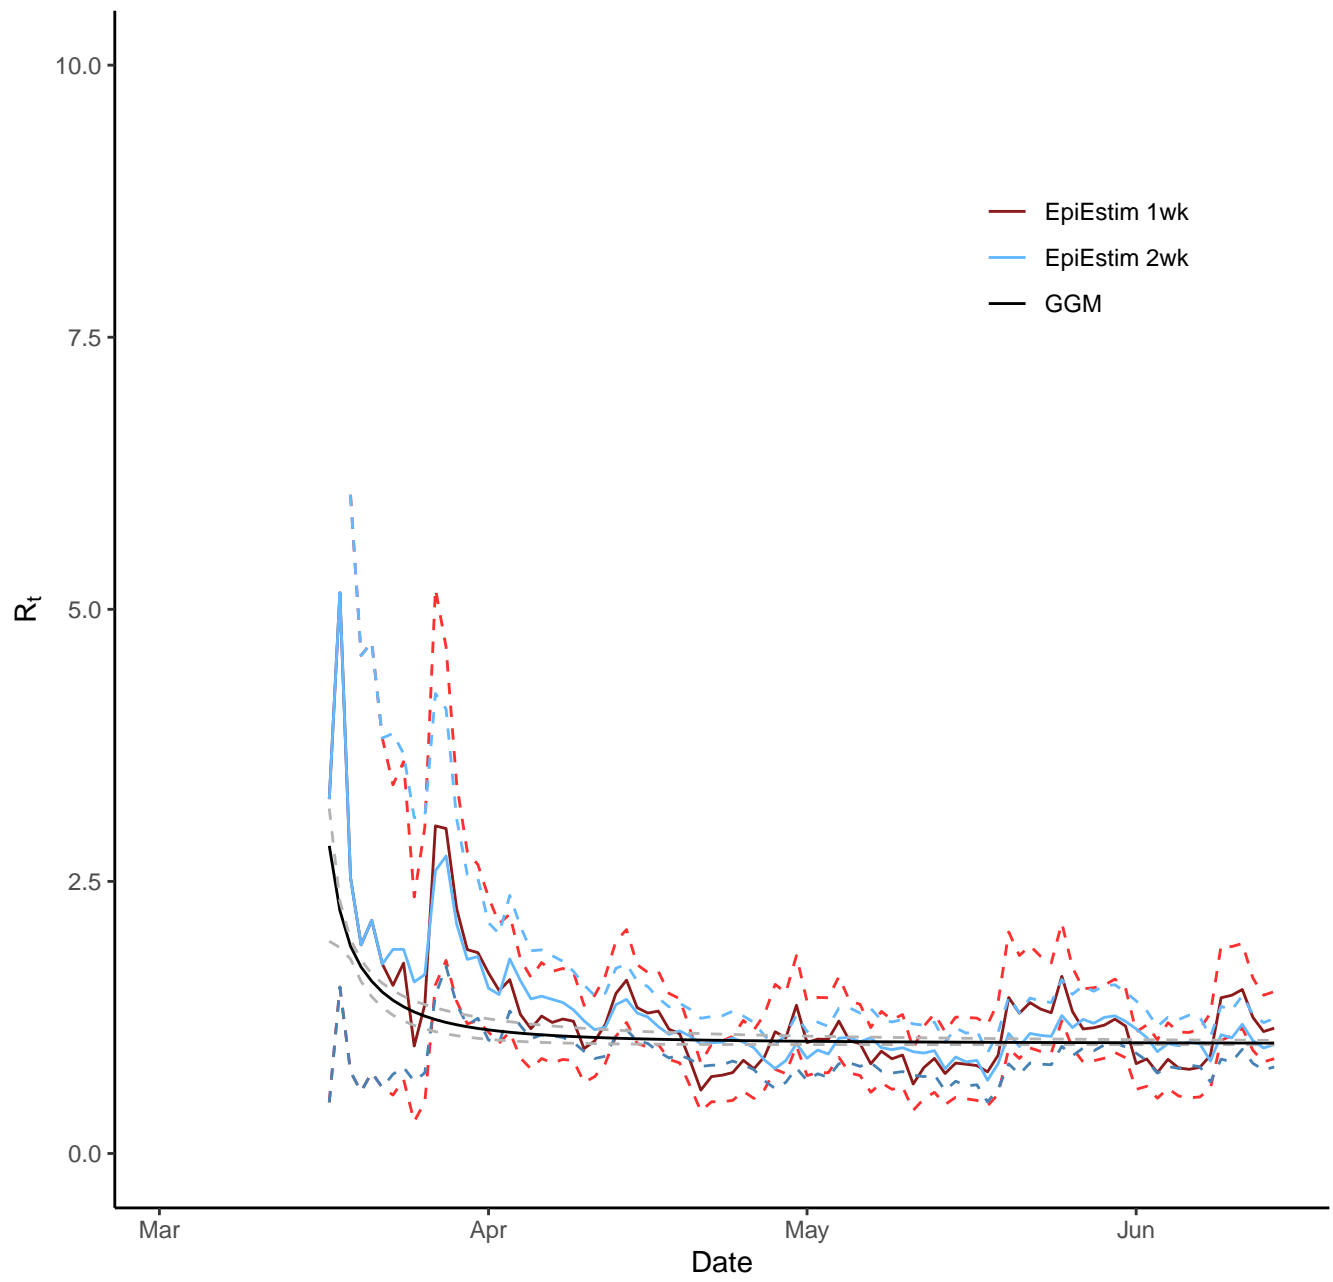



# Pickens

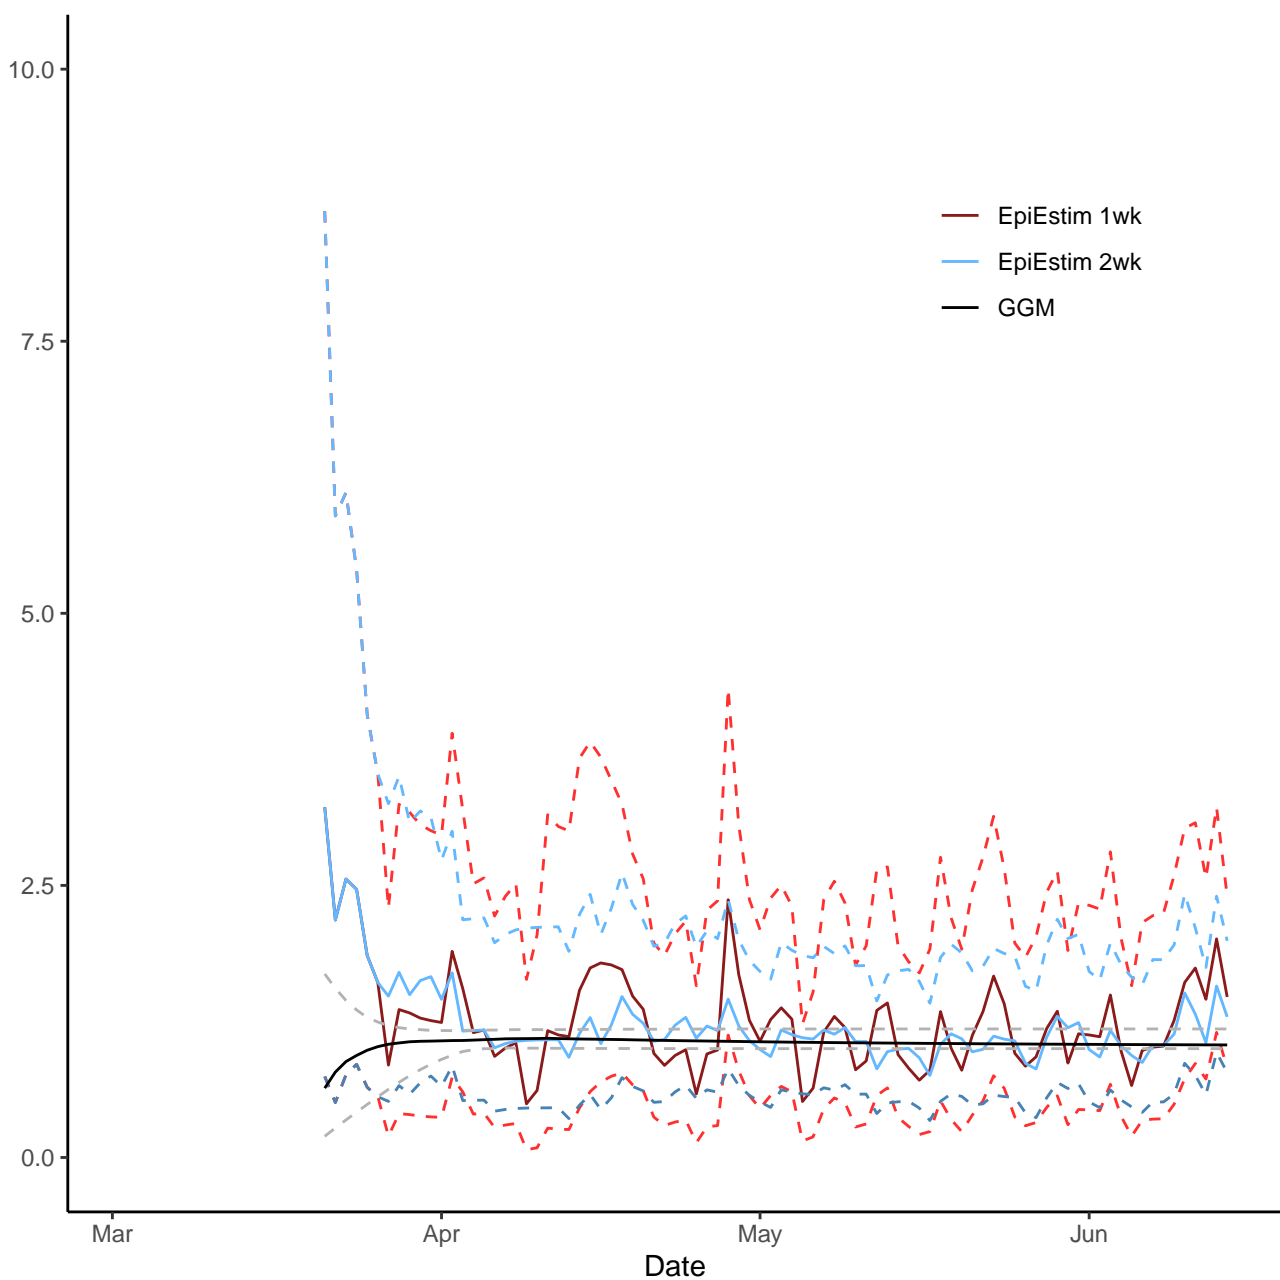

# Pike

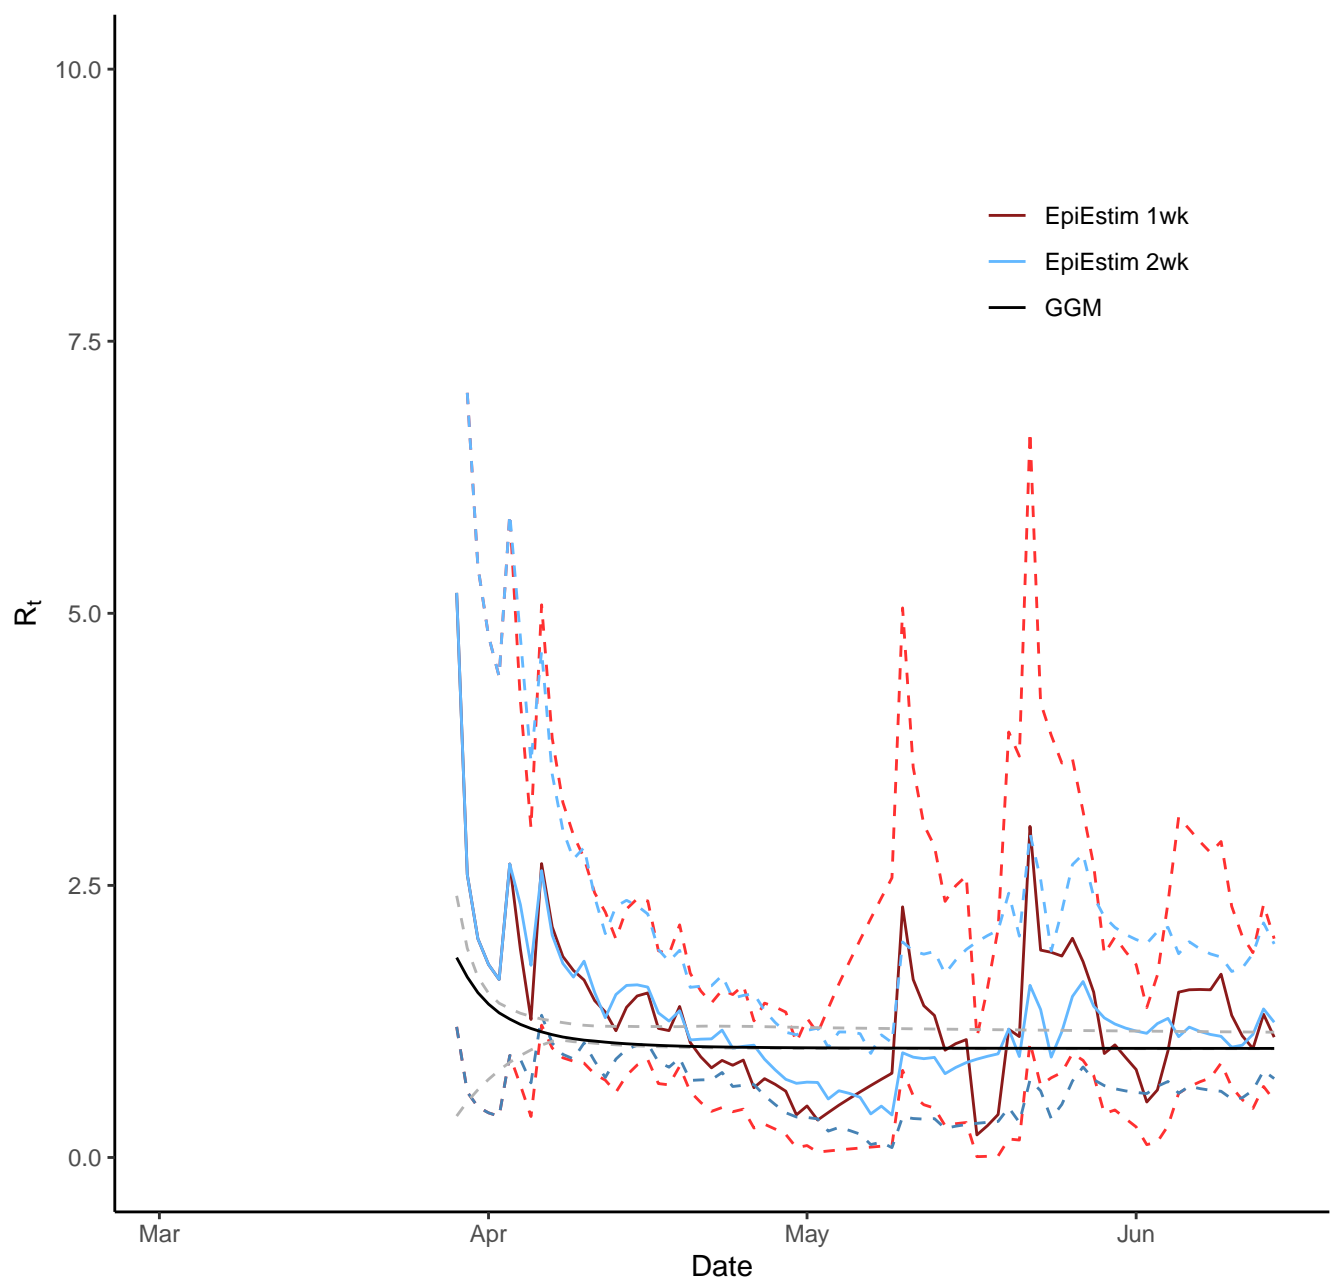

# Rockdale

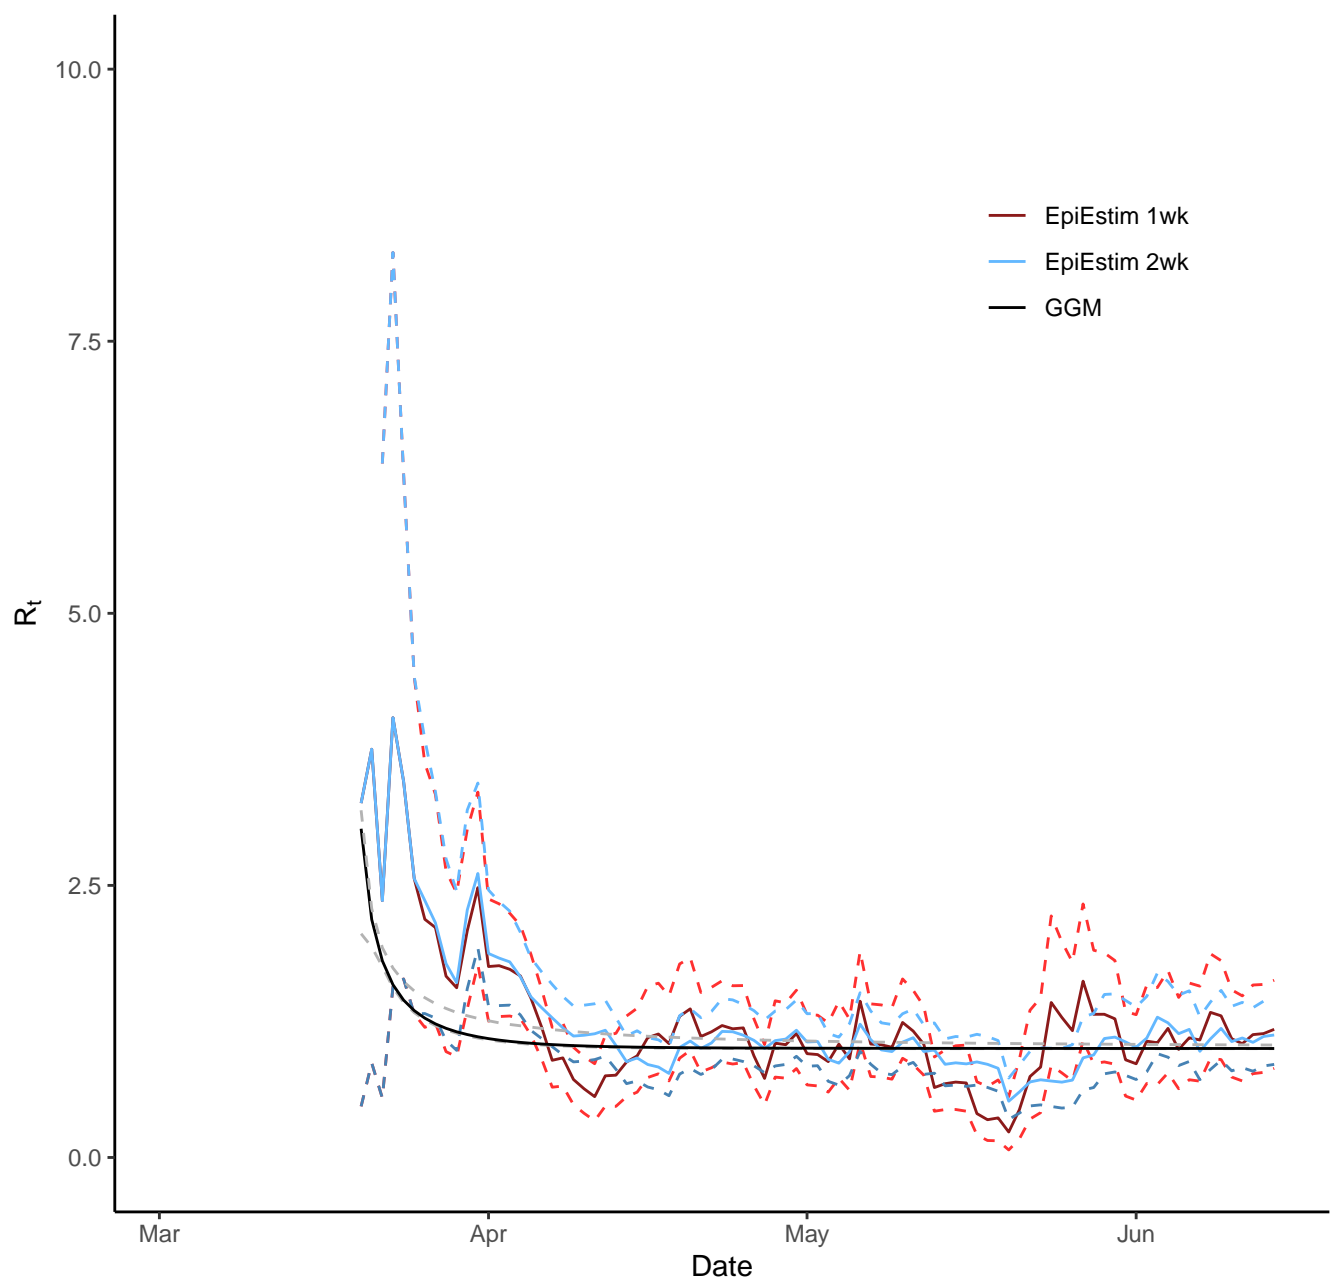

# Spalding

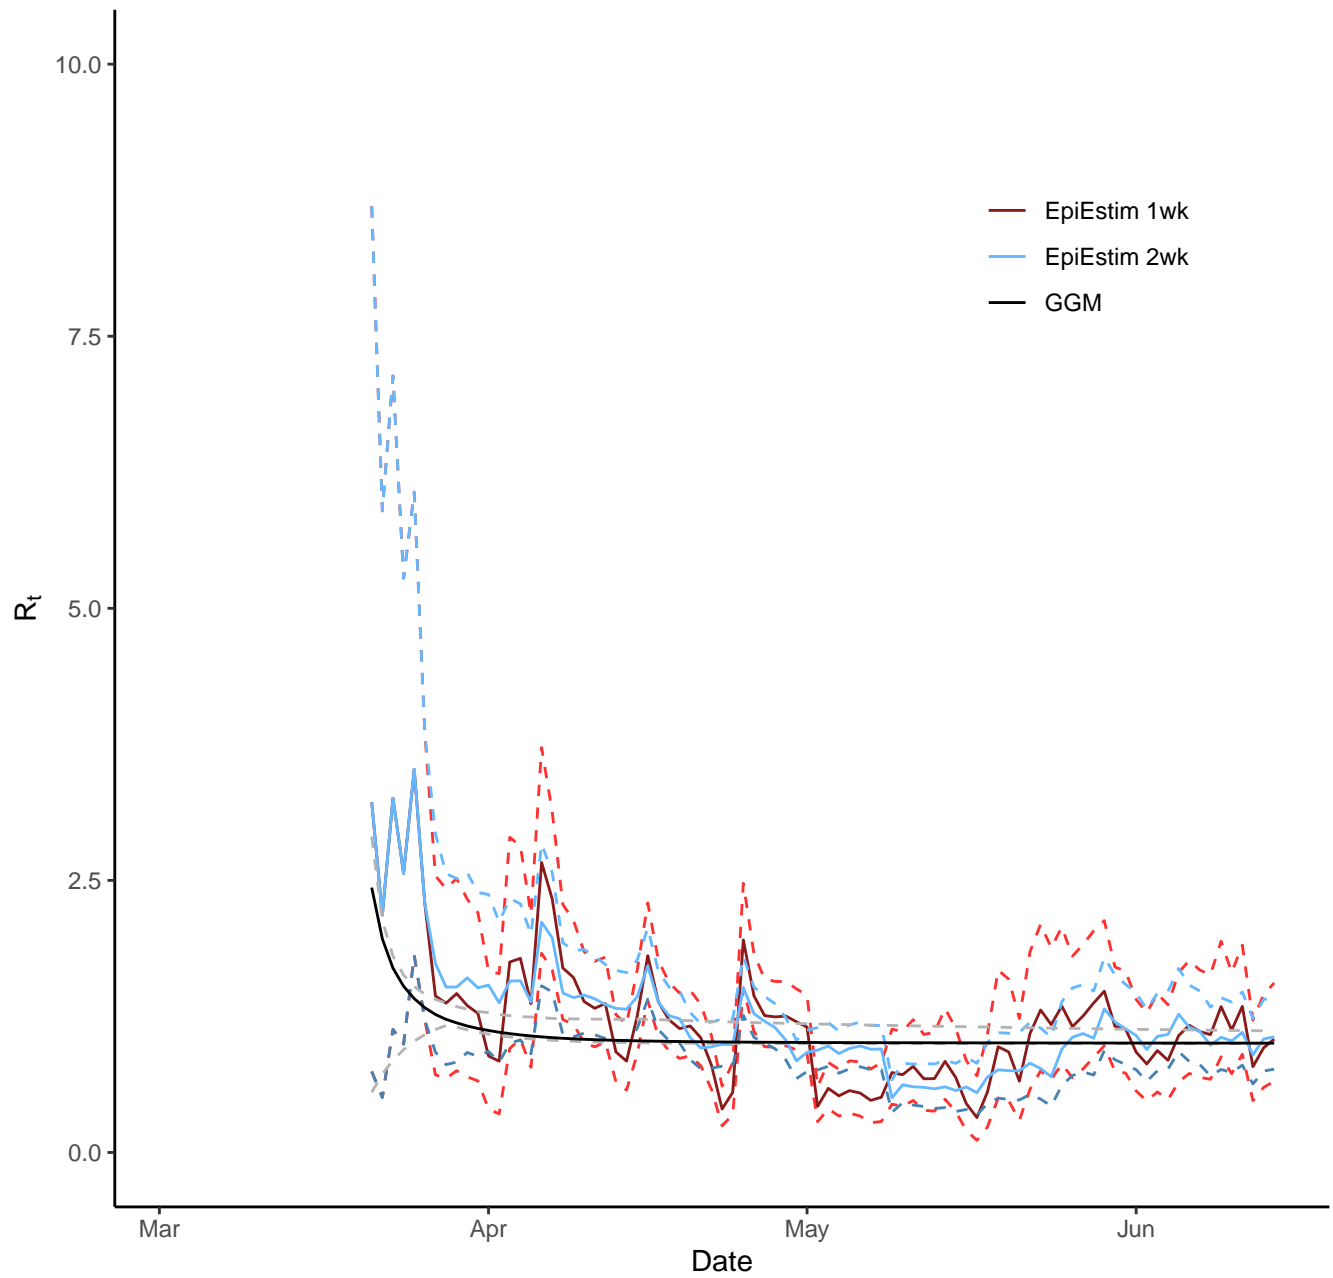

# Walton

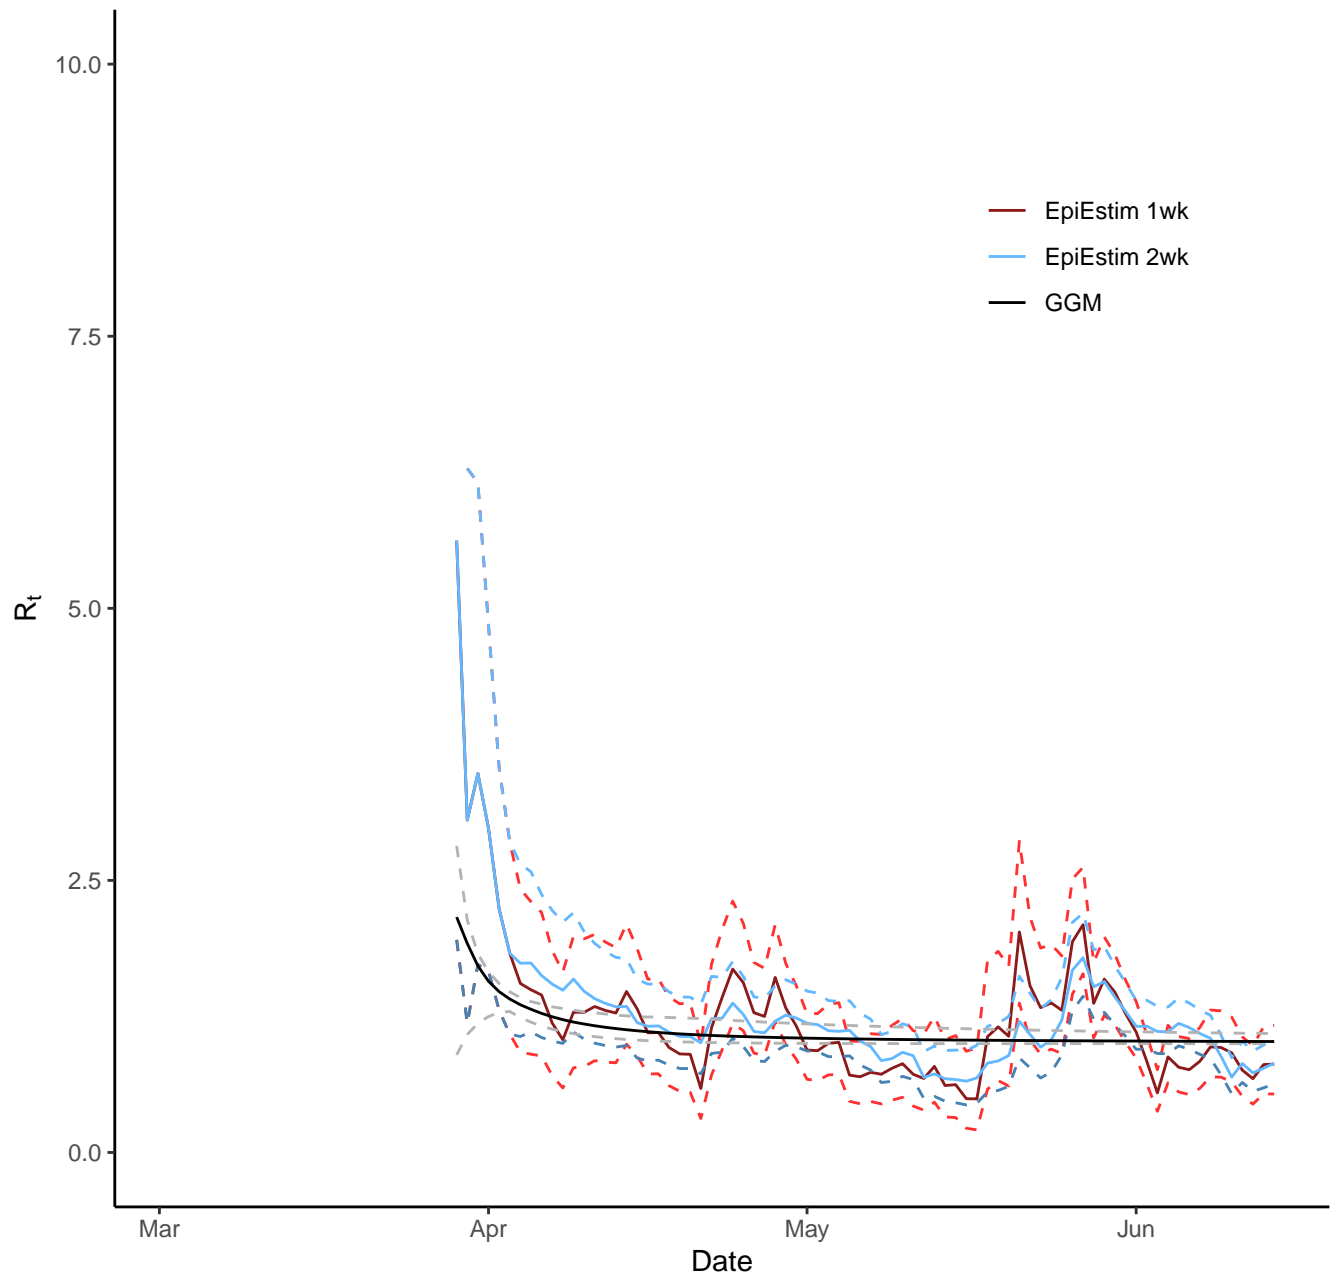

Source: https://medrxiv.org/content/10.1101/2020.05.19.20107219v2.full.pdf
